# Supplementary material for: High-entropy alloy nanopatterns by prescribed metallization of DNA origami templates
Source: PubMed Central journal article supplement (PMC10060391; doi:10.1038/s41467-023-37333-y), 2023-03-29
Supplement: 41467_2023_37333_MOESM1_ESM.pdf [file 41467_2023_37333_MOESM1_ESM.pdf]

*Supplementary information for*

# High-entropy alloy nanopatterns by prescribed metallization of DNA origami templates

**Mo Xie<sup>1,2†</sup>, Weina Fang<sup>3,4†</sup>, Zhibei Qu<sup>5†</sup>, Yang Hu<sup>1</sup>, Yichi Zhang<sup>6</sup>, Jie Chao<sup>1</sup>, Jiye Shi<sup>2</sup>, Lihua Wang<sup>2</sup>, Lianhui Wang<sup>1</sup>, Yang Tian<sup>3</sup>, Chunhai Fan<sup>6\*</sup>, Huajie Liu<sup>4\*</sup>**

<sup>1</sup>State Key Laboratory of Organic Electronics and Information Displays & Jiangsu Key Laboratory for Biosensors, Institute of Advanced Materials (IAM), Jiangsu National Synergetic Innovation Center for Advanced Materials (SICAM), Nanjing University of Posts and Telecommunications, 9 Wenyuan Road, Nanjing 210023, China.

<sup>2</sup>Division of Physical Biology, CAS Key Laboratory of Interfacial Physics and Technology, Shanghai Institute of Applied Physics, Chinese Academy of Sciences, Shanghai 201800, China.

<sup>3</sup>Shanghai Key Laboratory of Green Chemistry and Chemical Processes, Department of Chemistry, School of Chemistry and Molecular Engineering, East China Normal University, Dongchuan Road 500, Shanghai 200241, China.

<sup>4</sup>School of Chemical Science and Engineering, Shanghai Research Institute for Intelligent Autonomous Systems, Key Laboratory of Advanced Civil Engineering Materials of Ministry of Education, Tongji University, Shanghai 200092, China.

<sup>5</sup>Department of Medicinal Chemistry, School of Pharmacy, Fudan University, 826 Zhangheng Road, Shanghai 201203, China.

<sup>6</sup>School of Chemistry and Chemical Engineering, Frontiers Science Center for Transformative Molecules and National Center for Translational Medicine, Shanghai Jiao Tong University, Shanghai 200240, China.

†These authors contributed equally: Mo Xie, Weina Fang, Zhibei Qu.

\*E-mail: fanchunhai@sjtu.edu.cn; liuhuajie@tongji.edu.cn

This file includes:

Supplementary Figures 1 to 52

Supplementary Table 1 to 2

Supplementary Notes: DNA sequences

Supplementary References

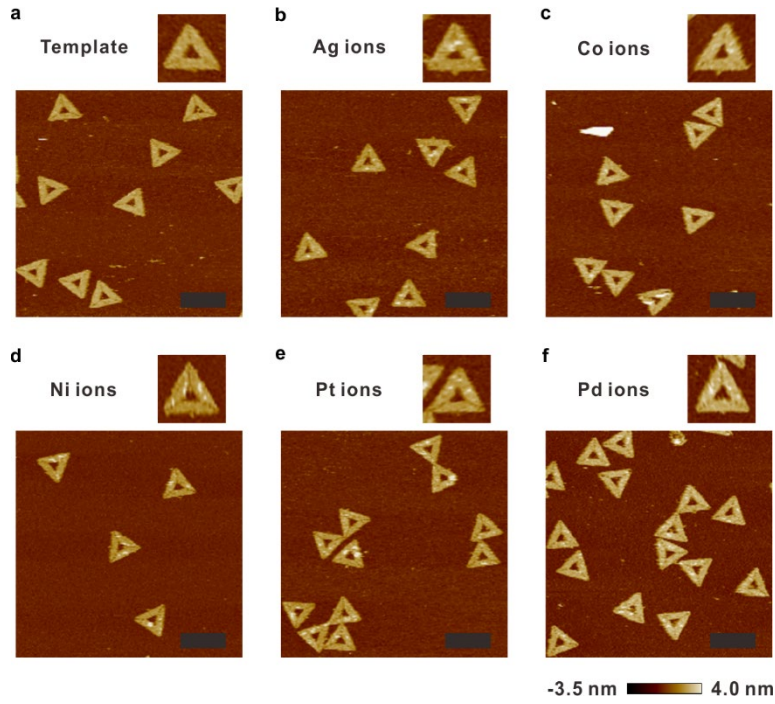

**Supplementary Figure 1.** Metal ions interact with pcDNA on triangular DNA origami template, causing condensation of pcDNA. AFM images of origami samples treated with different metal ions: (a) DNA origami template without treatment, (b) Ag ions, (c) Co ions, (d) Ni ions, (e) Pt ions, (f) Pd ions. Scale bars: 200 nm. Colour scales of all AFM images: from -3.5 nm to 4.0 nm.

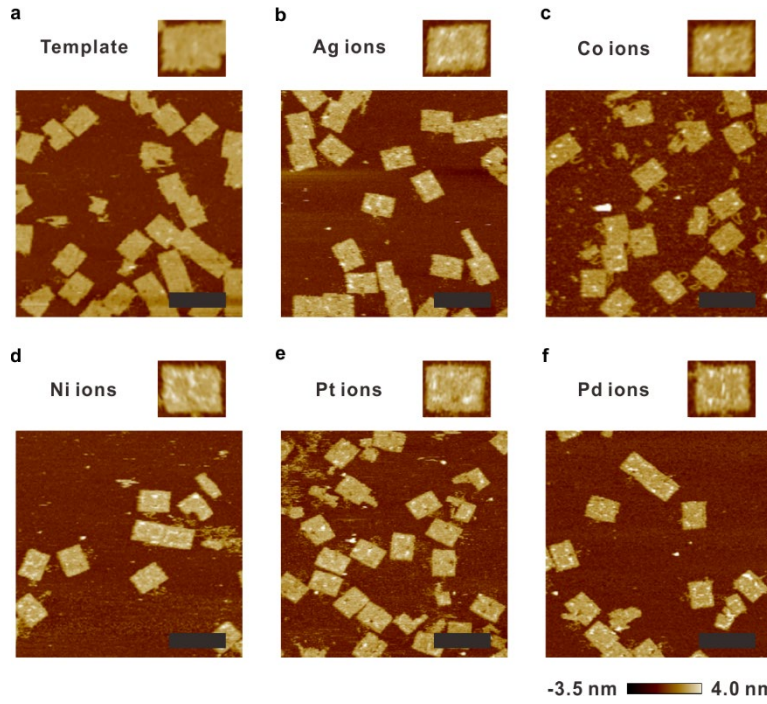

**Supplementary Figure 2.** Metal ions interact with pcDNA on digit 8 of rectangular DNA origami template, causing condensation of pcDNA. AFM images of origami samples treated with different metal ions: (a) DNA origami template without treatment, (b) Ag ions, (c) Co ions, (d) Ni ions, (e) Pt ions, (f) Pd ions. Scale bars: 200 nm. Colour scales of all AFM images: from -3.5 nm to 4.0 nm.

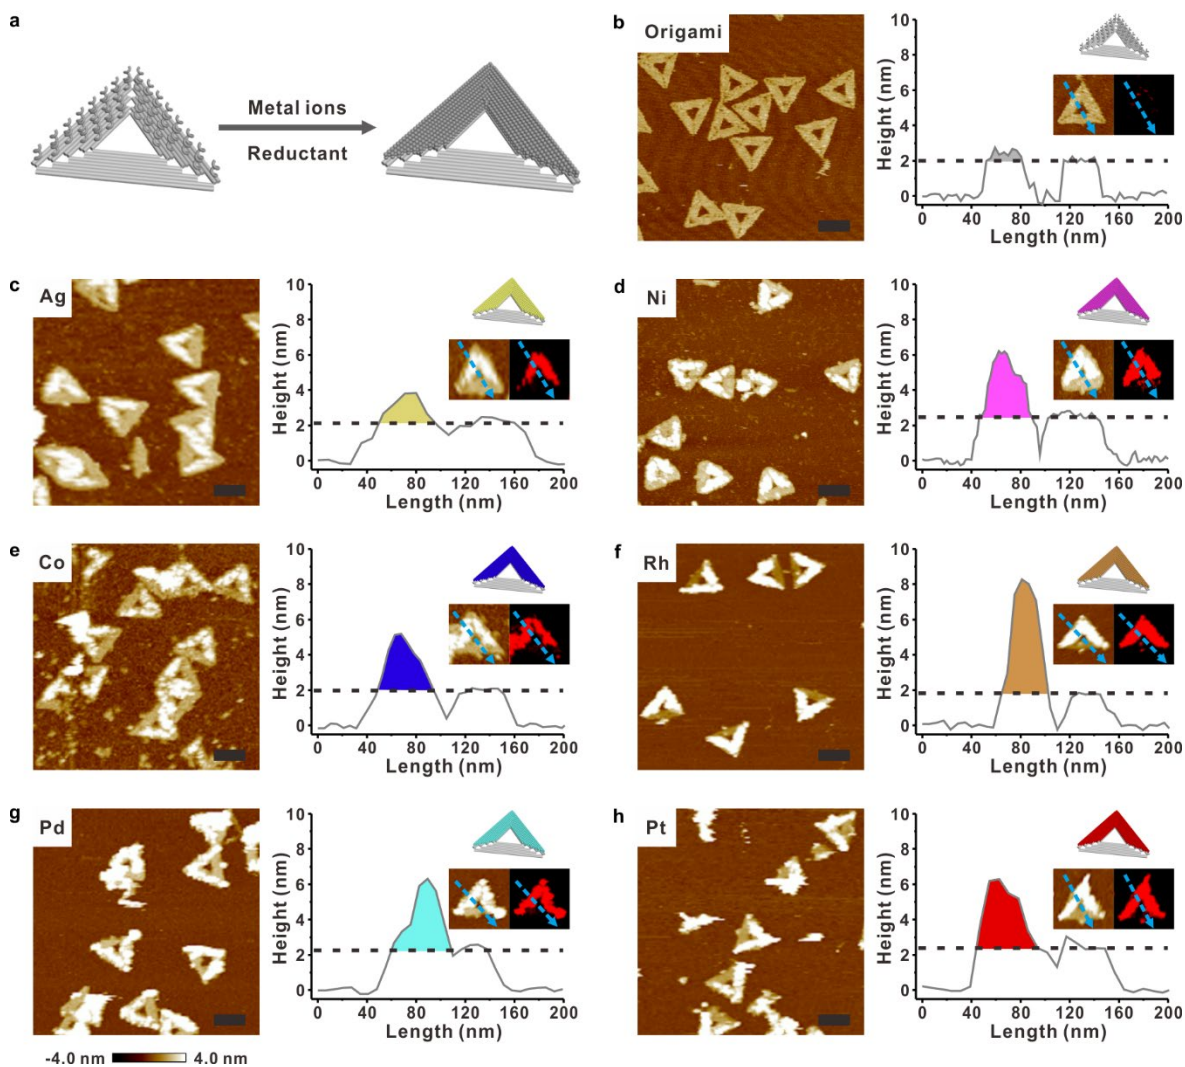

**Supplementary Figure 3.** AFM images of each unary metal nanoparticles on two sides of triangular DNA origami template and the corresponding height analysis. (a) Scheme depicting the template before and after metallization. (b) Triangular DNA origami structure with pcDNA strands (pcDNA average height:  $\sim 0.5$  nm (above the origami surface, hereinafter are the same), average FWHM:  $\sim 33.1$  nm). Each metallization unary nanopatterns: (c) Ag (Ag nanoparticles average height:  $\sim 2.1$  nm, average FWHM:  $\sim 35.5$  nm). (d) Ni (Ni nanoparticles average height:  $\sim 3.8$  nm, average FWHM:  $\sim 35.6$  nm). (e) Co (Co nanoparticles average height:  $\sim 2.1$  nm, average FWHM:  $\sim 36.6$  nm). (f) Rh (Rh nanoparticles average height:  $\sim 6.2$  nm, average FWHM:  $\sim 31.0$  nm). (g) Pd (Pd nanoparticles average height:  $\sim 4.1$  nm, average FWHM:  $\sim 34.3$  nm). (h) Pt (Pt nanoparticles average height:  $\sim 6.2$  nm, average FWHM:  $\sim 39.1$  nm). Scale bar: 100 nm. Colour scales of all AFM images: from  $-4.0$  nm to  $4.0$  nm. Source data are provided as a Source Data file.



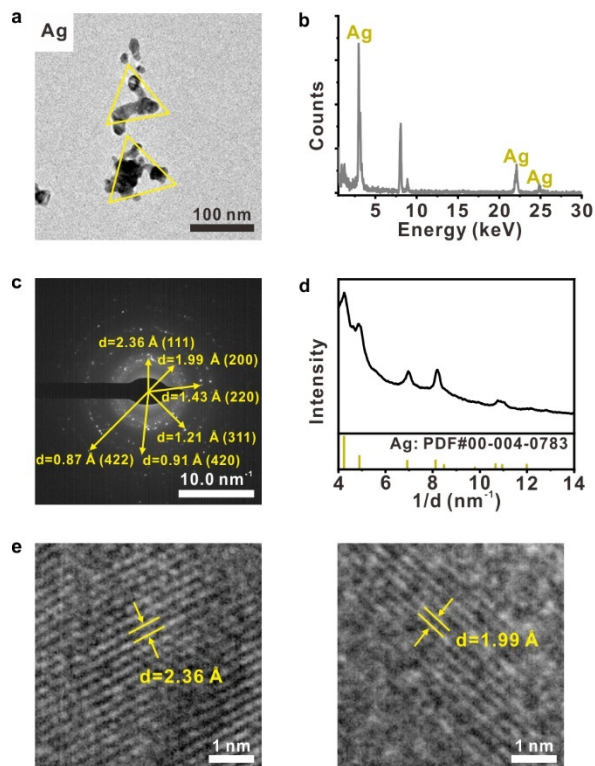

**Supplementary Figure 4.** TEM characterization of elements on two sides of triangular DNA origami template after DCIMP processes of silver unary system. (a) TEM image of V-shaped silver pattern. (b) EDX spectrum analysis. (c) Selected area electron diffraction (SAED) image presents ring diffraction pattern of a polycrystalline silver specimen. (d) Diffraction pattern intensity profile of silver specimen. (e) High-resolution TEM (HR-TEM) image of a region of Ag nanoparticle. Source data are provided as a Source Data file.

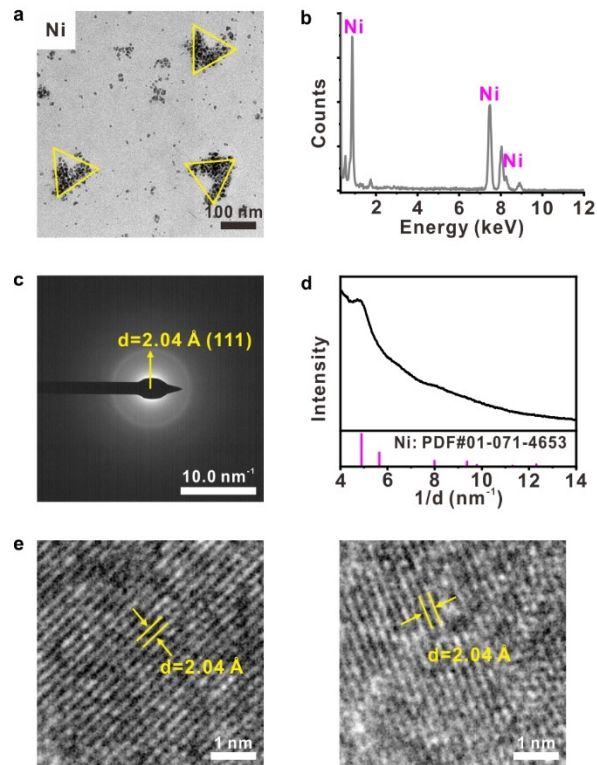

**Supplementary Figure 5.** TEM characterization of elements on two sides of triangular DNA origami template after DCIMP processes of nickel unary system. (a) TEM image of V-shaped nickel pattern. (b) EDX spectrum analysis. (c) SAED image presents ring diffraction pattern of a polycrystalline nickel specimen. (d) Diffraction pattern intensity profile of nickel specimen. (e) HR-TEM image of a region of Ni nanoparticle. Source data are provided as a Source Data file.

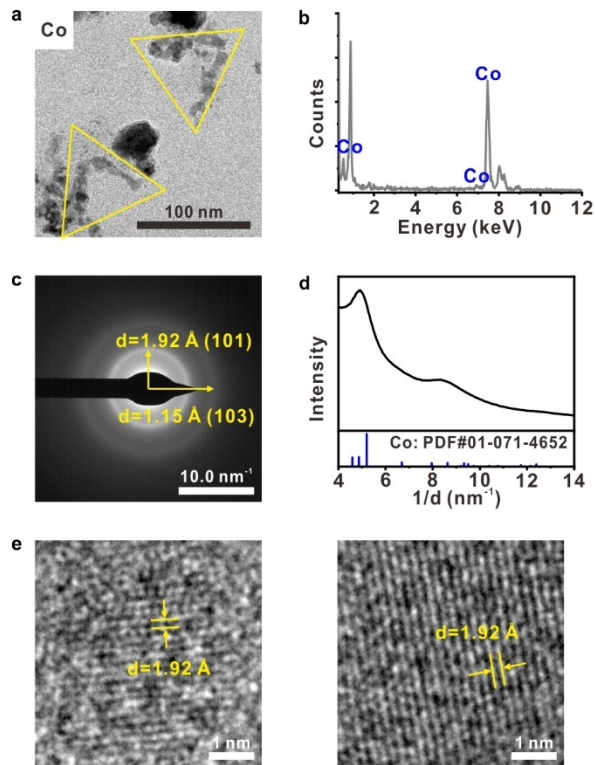

**Supplementary Figure 6.** TEM characterization of elements on two sides of triangular DNA origami template after DCIMP processes of cobalt unary system. (a) TEM image of V-shaped cobalt pattern. (b) EDX spectrum analysis. (c) SAED image presents ring diffraction pattern of a polycrystalline cobalt specimen. (d) Diffraction pattern intensity profile of cobalt specimen. (e) HR-TEM image of a region of Co nanoparticle. Source data are provided as a Source Data file.

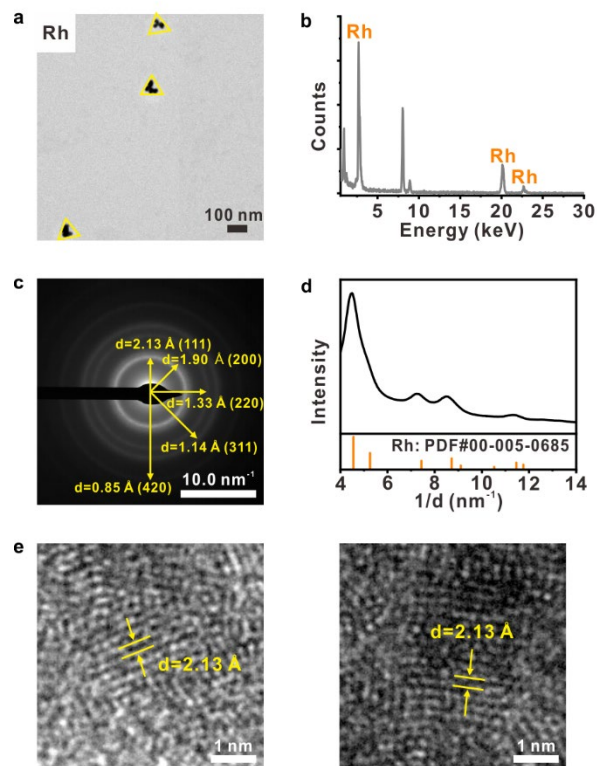

**Supplementary Figure 7.** TEM characterization of elements on two sides of triangular DNA origami template after DCIMP processes of rhodium unary system. (a) TEM image of V-shaped rhodium pattern. (b) EDX spectrum analysis. (c) SAED image presents ring diffraction pattern of a polycrystalline rhodium specimen. (d) Diffraction pattern intensity profile of rhodium specimen. (e) HR-TEM image of a region of Rh nanoparticle. Source data are provided as a Source Data file.

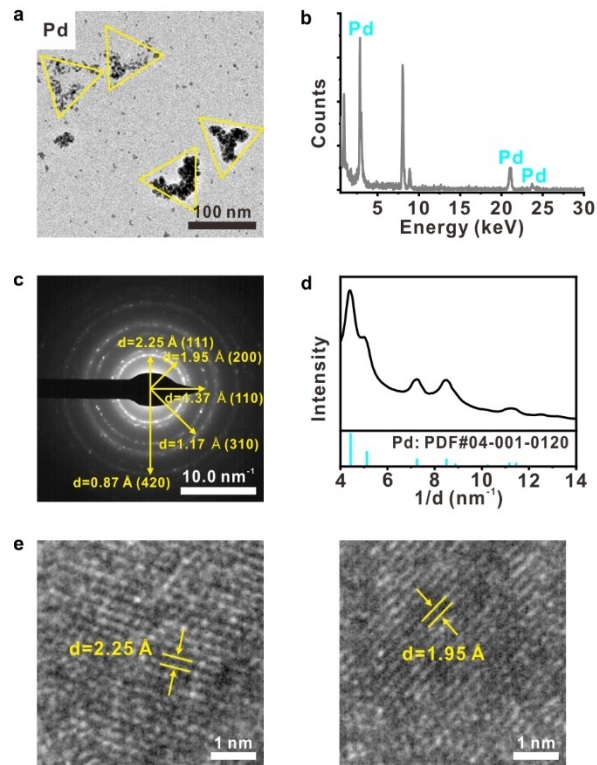

**Supplementary Figure 8.** TEM characterization of elements on two sides of triangular DNA origami template after DCIMP processes of palladium unary system. (a) TEM image of V-shaped palladium pattern. (b) EDX spectrum analysis. (c) SAED image presents ring diffraction pattern of a polycrystalline palladium specimen. (d) Diffraction pattern intensity profile of palladium specimen. (e) HR-TEM image of a region of Pd nanoparticle. Source data are provided as a Source Data file.



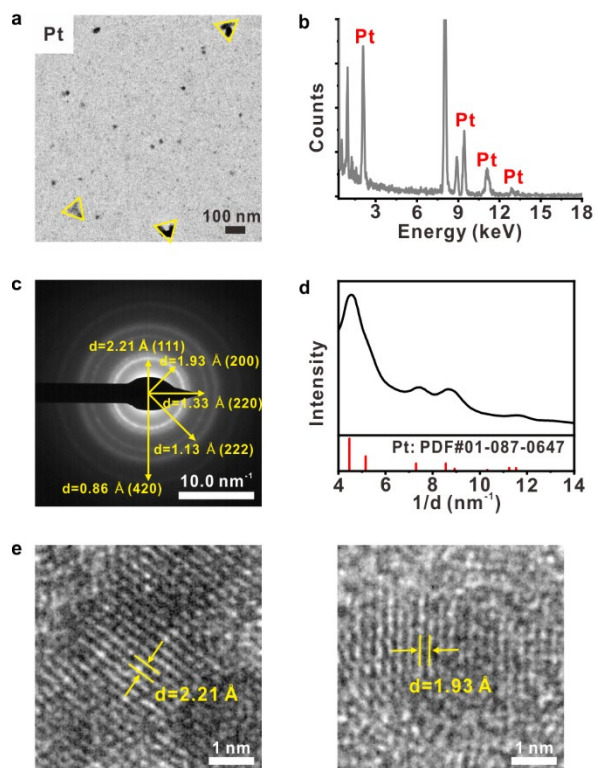

**Supplementary Figure 9.** TEM characterization of elements on two sides of triangular DNA origami template after DCIMP processes of platinum unary system. (a) TEM image of V-shaped platinum pattern. (b) EDX spectrum analysis. (c) SAED image presents ring diffraction pattern of a polycrystalline platinum specimen. (d) Diffraction pattern intensity profile of platinum specimen. (e) HR-TEM image of a region of Pt nanoparticle. Source data are provided as a Source Data file.

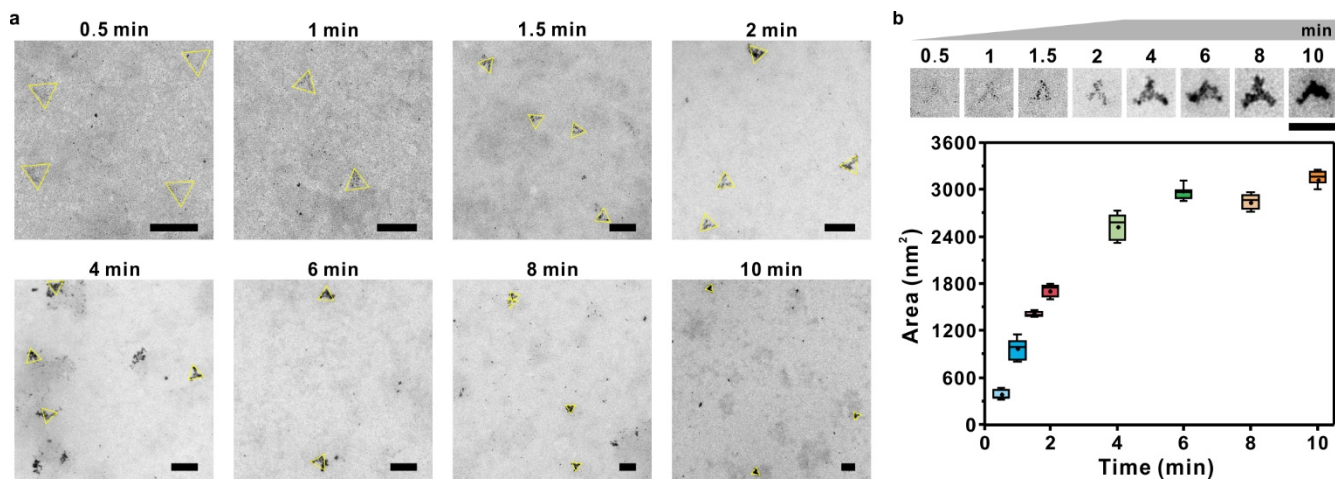

**Supplementary Figure 10.** Pd morphological evolutions on triangular DNA origami template at different reaction time points. (a) TEM image. (b) Representative structure and quantitative analysis of the Pd area at different reaction time points (N=5, error bars: SD). Scale bars: 200 nm. Source data are provided as a Source Data file.

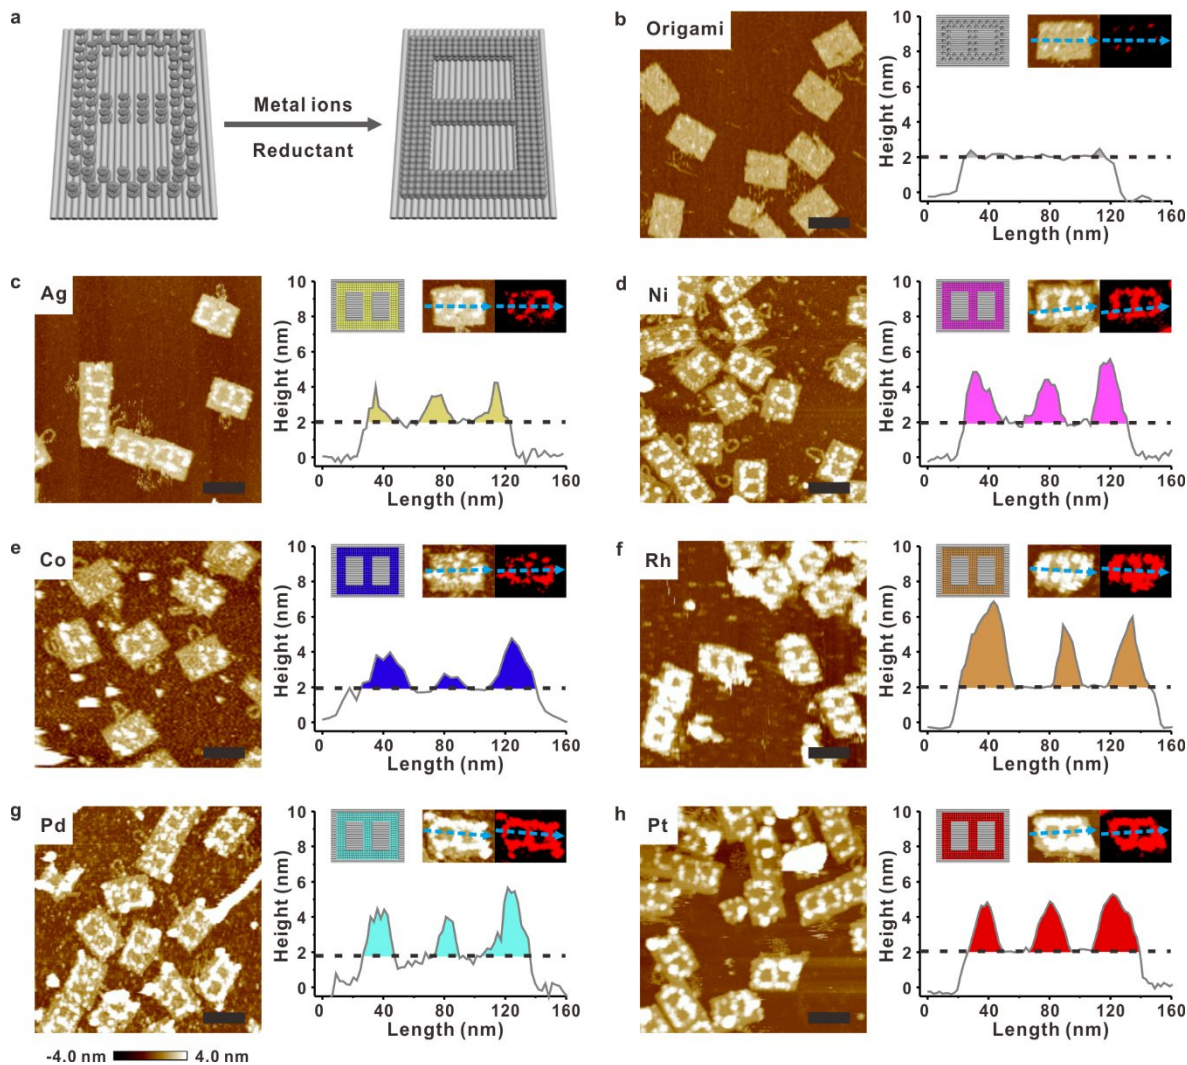

**Supplementary Figure 11.** AFM images of each unary metal nanoparticles on digit 8 of rectangular DNA origami template and the corresponding height analysis. (a) Scheme depicting the template before and after metallization. (b) Rectangular DNA origami structure with digit 8 parttened pcDNA strands (pcDNA average height:  $\sim 0.4$  nm (above the origami surface, hereinafter are the same), average FWHM:  $\sim 4.6$  nm). Each metallization unary nanopatterns: (c) Ag (Ag nanoparticles average height:  $\sim 2.0$  nm, average FWHM:  $\sim 8.8$  nm). (d) Ni (Ni nanoparticles average height:  $\sim 2.9$  nm, average FWHM:  $\sim 14.2$  nm). (e) Co (Co nanoparticles average height:  $\sim 2.0$  nm, average FWHM:  $\sim 15.9$  nm). (f) Rh (Rh nanoparticles average height:  $\sim 4.1$  nm, average FWHM:  $\sim 16.6$  nm). (g) Pd (Pd nanoparticles average height:  $\sim 2.9$  nm, average FWHM:  $\sim 13.4$  nm). (h)Pt (Pt nanoparticles average height:  $\sim 3.0$  nm, average FWHM:  $\sim 16.3$  nm). Scale bar: 100 nm. Colour scales of all AFM images: from  $-4.0$  nm to  $4.0$  nm. Source data are provided as a Source Data file.

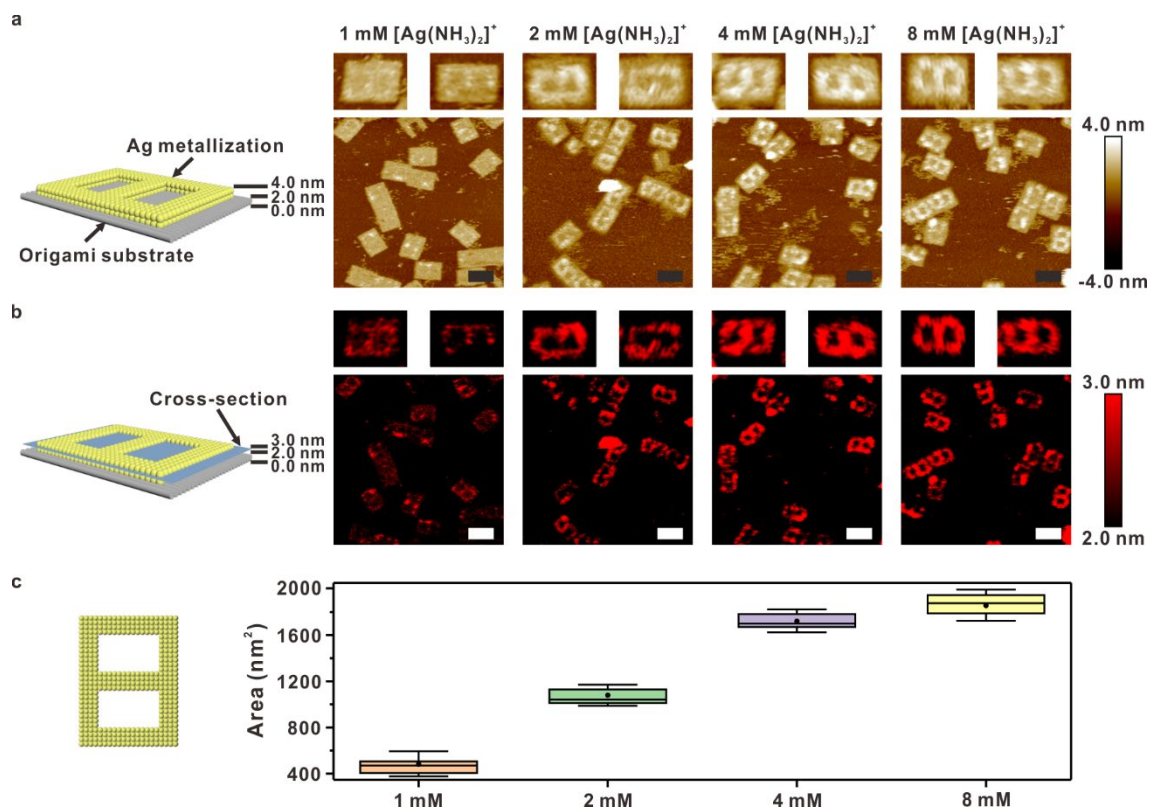

**Supplementary Figure 12.** Silver nanopatterns constructed on digit 8 templates with different concentrations of silver precursor ( $[\text{Ag}(\text{NH}_3)_2]^+$ ). Reductant concentration: 20 mM Formaldehyde. Reaction time: 10 min. (a) AFM images of Ag metallization on origami substrate. (b) Tomography images of silver nanopatterns areas above the origami surface. Tomographic of cross-sectional areas at 2 nm to 3 nm height. (c) Quantitative analysis of metal area (N=5, error bars: SD). Scale bars: 100 nm. Source data are provided as a Source Data file.

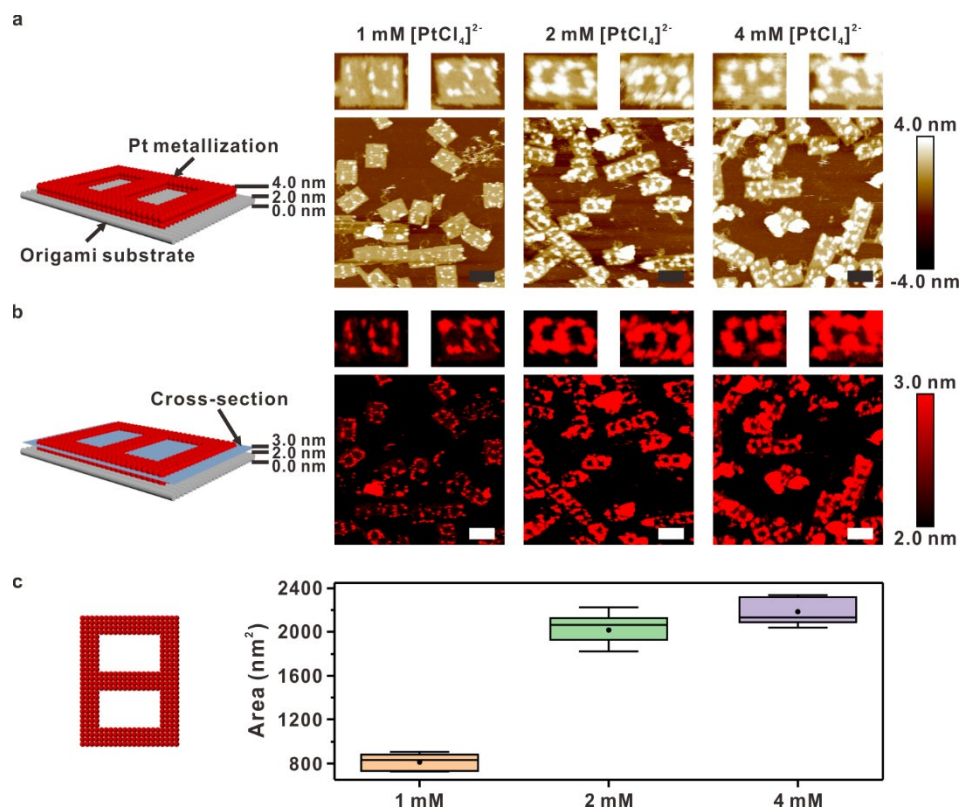

**Supplementary Figure 13.** Platinum nanopatterns constructed on digit 8 patterns with different concentrations of platinum precursor ( $[\text{PtCl}_4]^{2-}$ ). Reductant concentration: 20 mM DMAB. Reaction time: 10 min. (a) AFM images of Pt metallization on origami substrate. (b) Tomography images of platinum nanopatterns areas above the origami surface. Tomographic of cross-sectional areas at 2 nm to 3 nm height. (c) Quantitative analysis of metal area (N=5, error bars: SD). Scale bars: 100 nm. Source data are provided as a Source Data file.



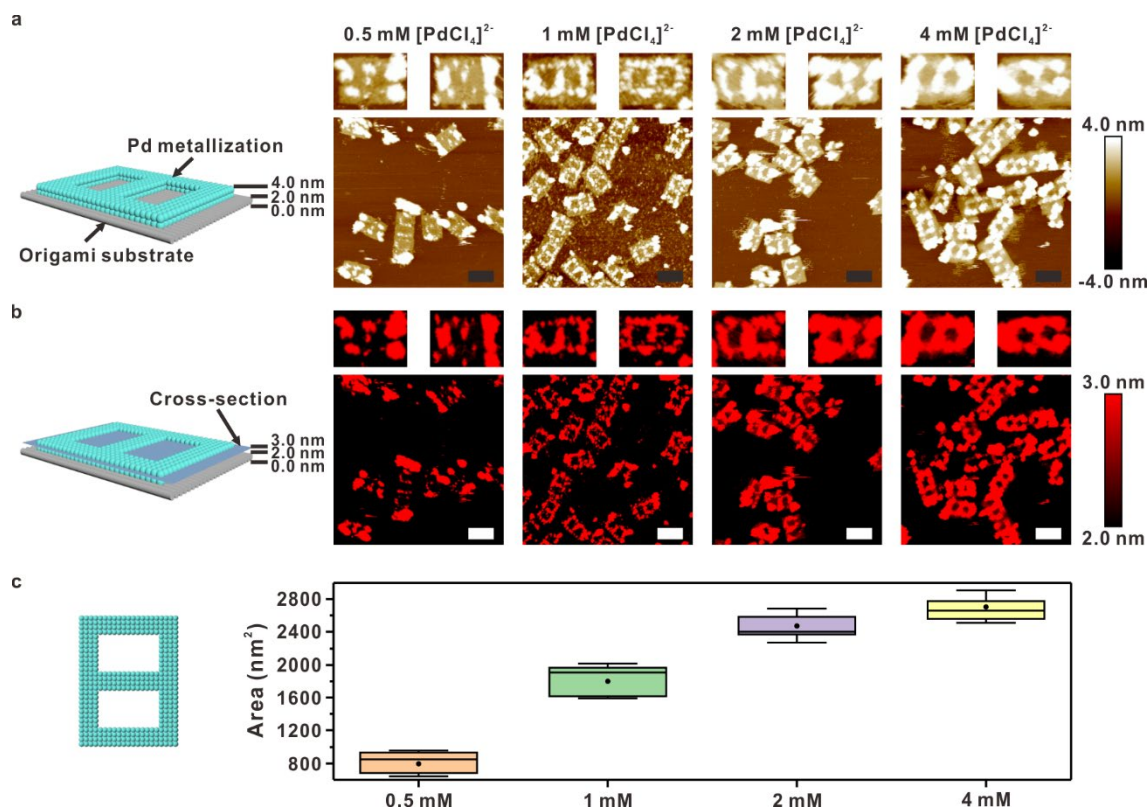

**Supplementary Figure 14.** Palladium nanopatterns constructed on digit 8 patterns with different concentrations of palladium precursor ( $[\text{PdCl}_4]^{2-}$ ). Reductant concentration: 20 mM DMAB. Reaction time: 10 min. (a) AFM images of Pd metallization on origami substrate. (b) Tomography images of palladium nanopatterns areas above the origami surface. Tomographic of cross-sectional areas at 2 nm to 3 nm height. (c) Quantitative analysis of metal area (N=5, error bars: SD). Scale bars: 100 nm. Source data are provided as a Source Data file.

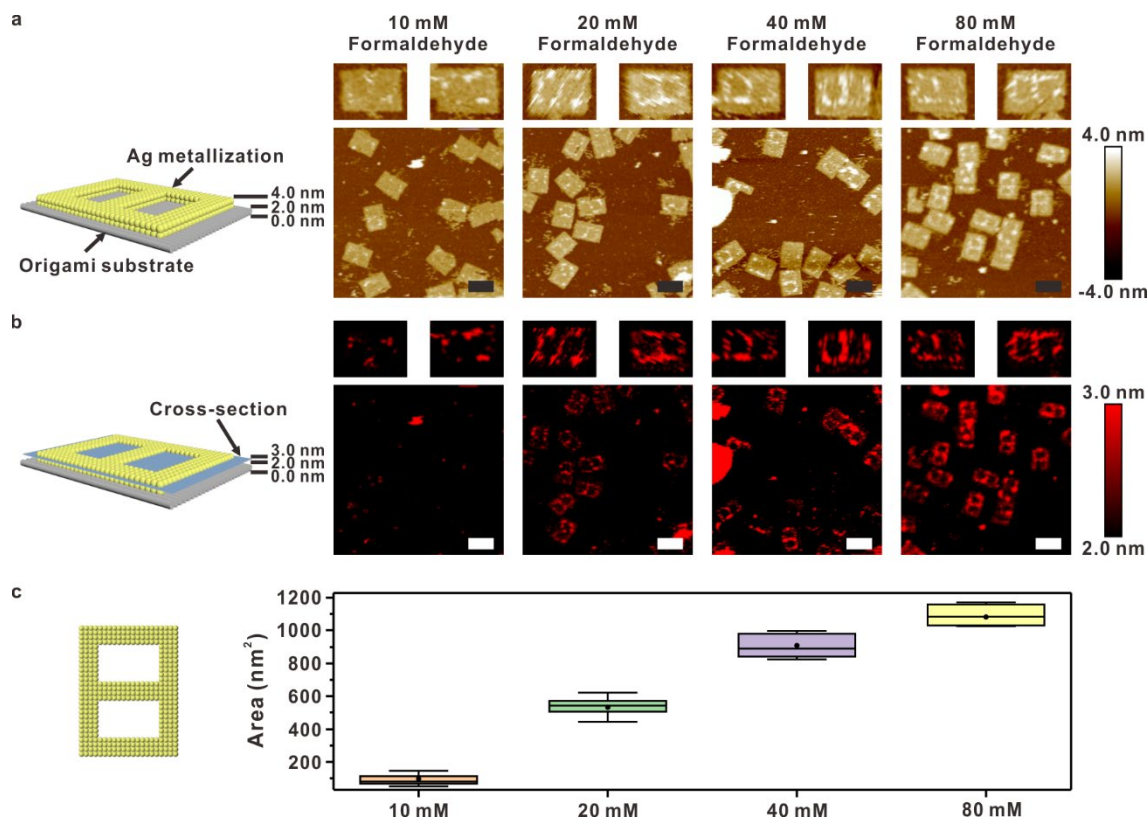

**Supplementary Figure 15.** Silver nanopatterns constructed on digit 8 patterns with different concentrations of reductant (formaldehyde). Silver precursor concentration: 4 mM  $[\text{Ag}(\text{NH}_3)_2]^+$ . Reaction time: 10 min. (a) AFM images of Ag metallization on origami substrate. (b) Tomography images of silver nanopatterns areas above the origami surface. Tomographic of cross-sectional areas at 2 nm to 3 nm height. (c) Quantitative analysis of metal area (N=5, error bars: SD). Scale bars: 100 nm. Source data are provided as a Source Data file.

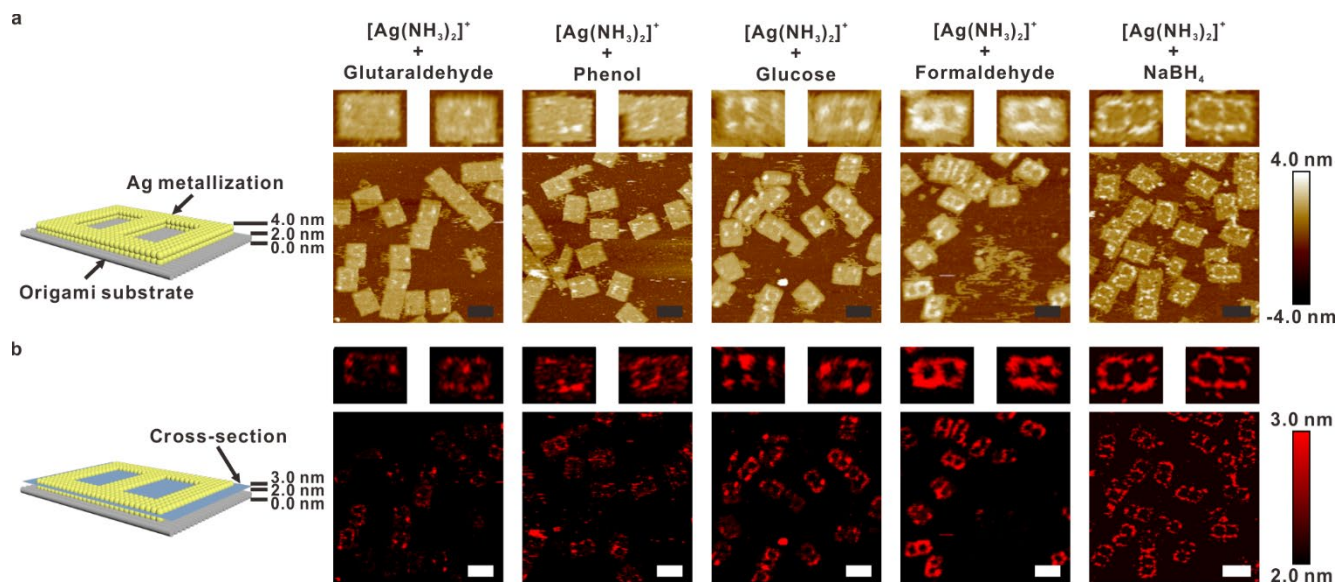

**Supplementary Figure 16.** Silver nanopatterns constructed on digit 8 patterns with different types of reductants. Silver precursor concentration: 4 mM  $[\text{Ag}(\text{NH}_3)_2]^+$ . Reductant concentration: 20 mM. Reaction time: 10 min. (a) AFM images of Ag metallization on origami substrate. (b) Tomography images of silver nanoparticles areas above the origami surface. Tomographic of cross-sectional areas at 2 nm to 3 nm height. Scale bars: 100 nm.

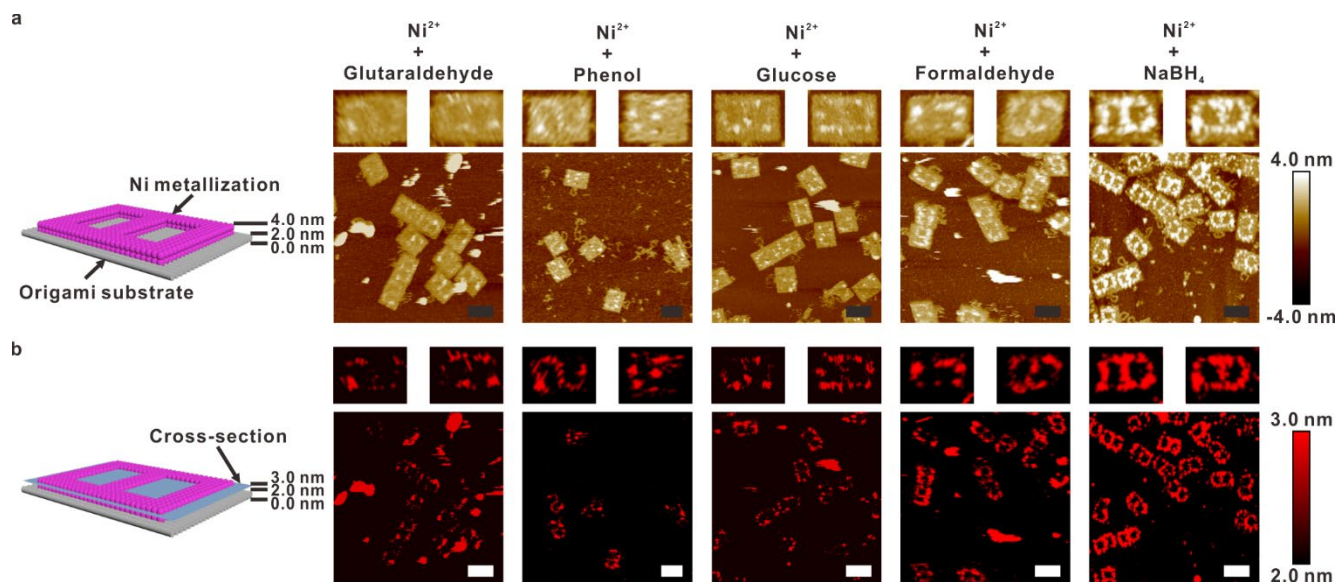

**Supplementary Figure 17.** Nickel nanopatterns constructed on digit 8 patterns with different types of reductants. Nickel precursor concentration: 4 mM  $\text{Ni}^{2+}$ . Reductant concentration: 20 mM. Reaction time: 10 min. (a) AFM images of Ni metallization on origami substrate. (b) Tomography images of nickel nanoparticles areas above the origami surface. Tomographic of cross-sectional areas at 2 nm to 3 nm height. Scale bars: 100 nm.

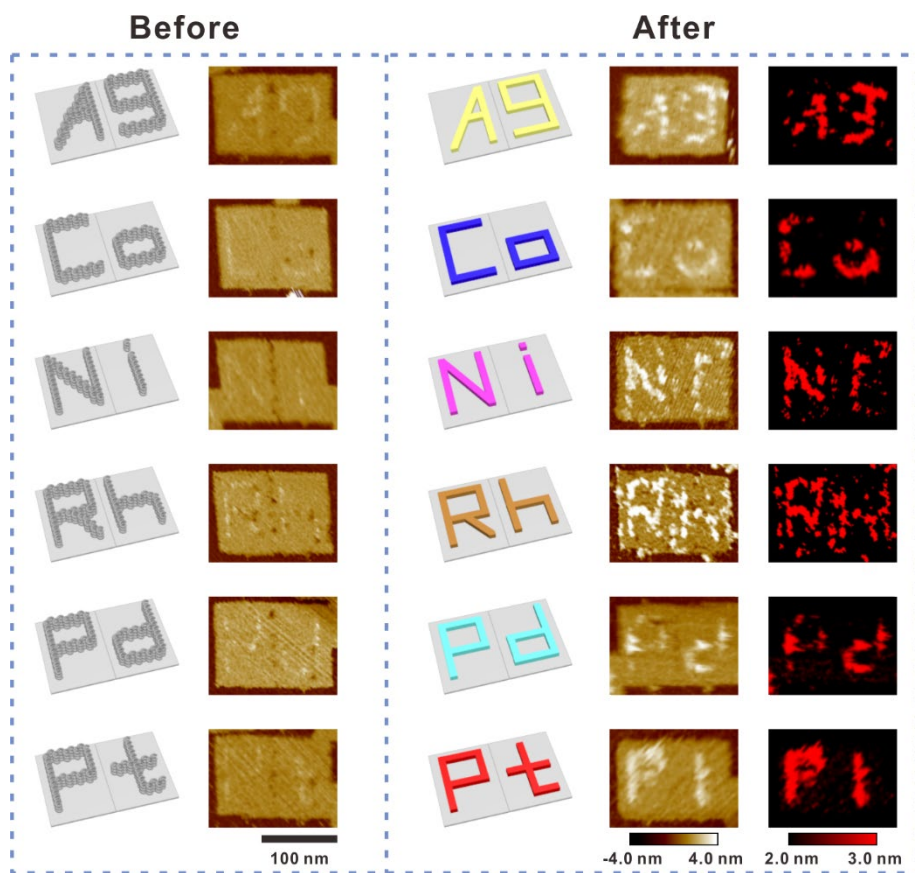

**Supplementary Figure 18.** Each unary metal nanoparticles on alphabet patterned rectangle origami dimer structure template. First column: schematic diagram of elemental symbol patterned of each metal include Ag, Co, Ni, Rh, Pd and Pt before metallization. Second column: AFM images of corresponding rectangle origami dimer structure, and patterns were faintly visible. Third column: schematic diagram of elemental symbol patterned on origami dimer after metallization. Fourth column: AFM images of corresponding metal nanoparticle observed as bright protrusion on origami template after metallization. Fifth column: AFM images depicting metal nanoparticle above the origami surface. Scale bars: 100 nm. Colour scales of AFM images: from -4.0 nm to 4.0 nm. Colour scales of cross-section images: from 2.0 nm to 3.0 nm.



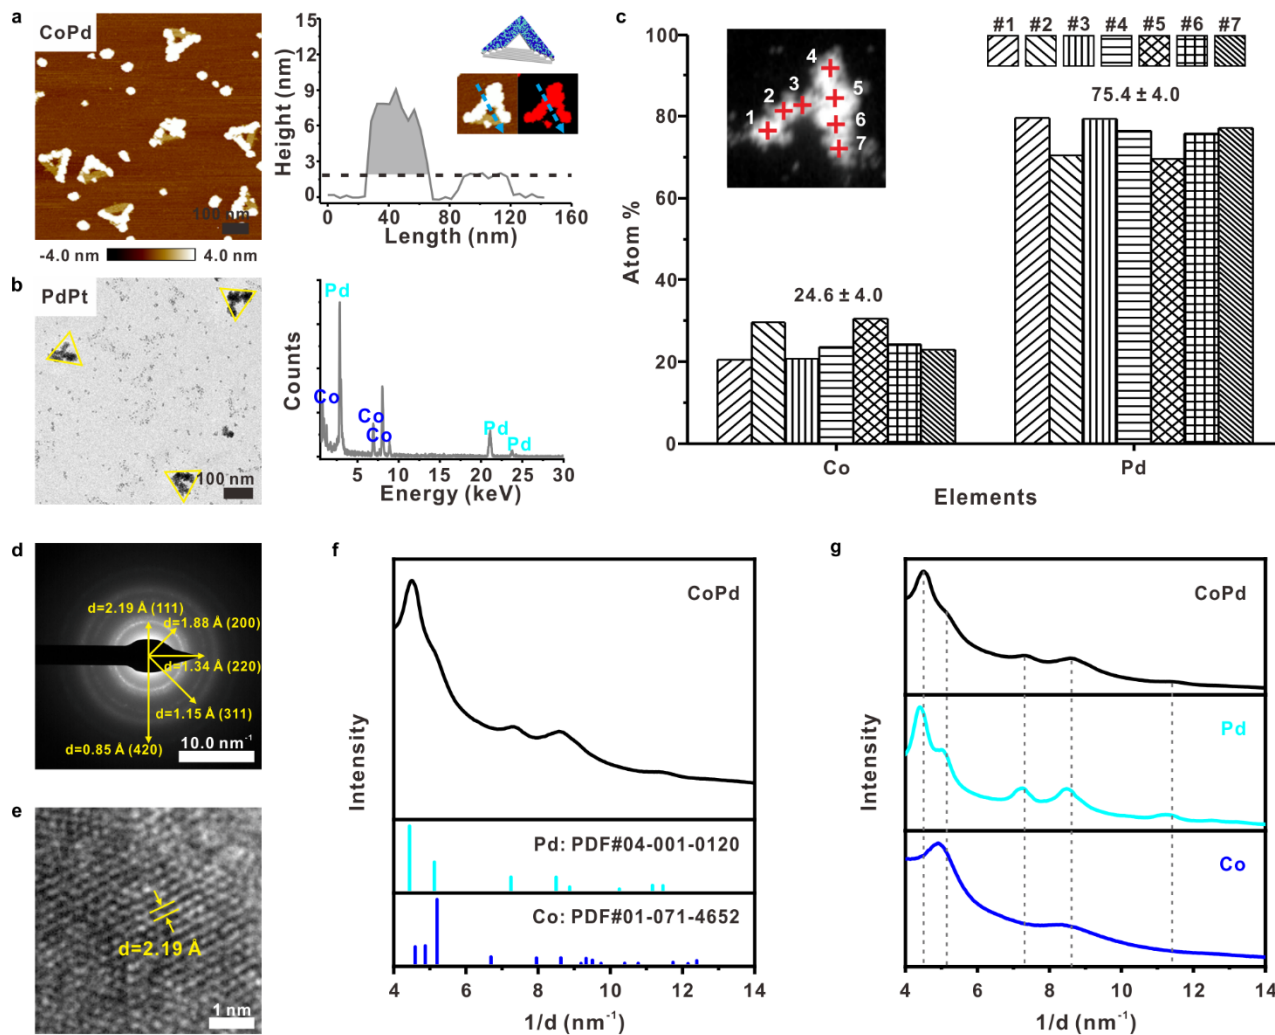

**Supplementary Figure 19.** Characterization of binary (CoPd) nanoparticles on two sides of triangular DNA origami template after DCIMP processes. (a) AFM images and the corresponding height analysis (nanoparticles average height:  $\sim 6.2$  nm above the origami surface, average FWHM:  $\sim 38.6$  nm). (b) TEM image and EDX spectrum analysis. (c) Atomic percentage distributions for each element at different sample regions of a CoPd nanoparticle, the average composition is Co ( $24.6 \pm 4.0\%$ ), Pd ( $75.4 \pm 4.0\%$ ). (d) SAED image presents ring diffraction pattern of a polycrystalline CoPd specimen. (e) HR-TEM image of a region of CoPd nanoparticle. (f) Diffraction pattern intensity profile of CoPd specimen. (g) Comparison CoPd with individual Co and Pd. Source data are provided as a Source Data file.

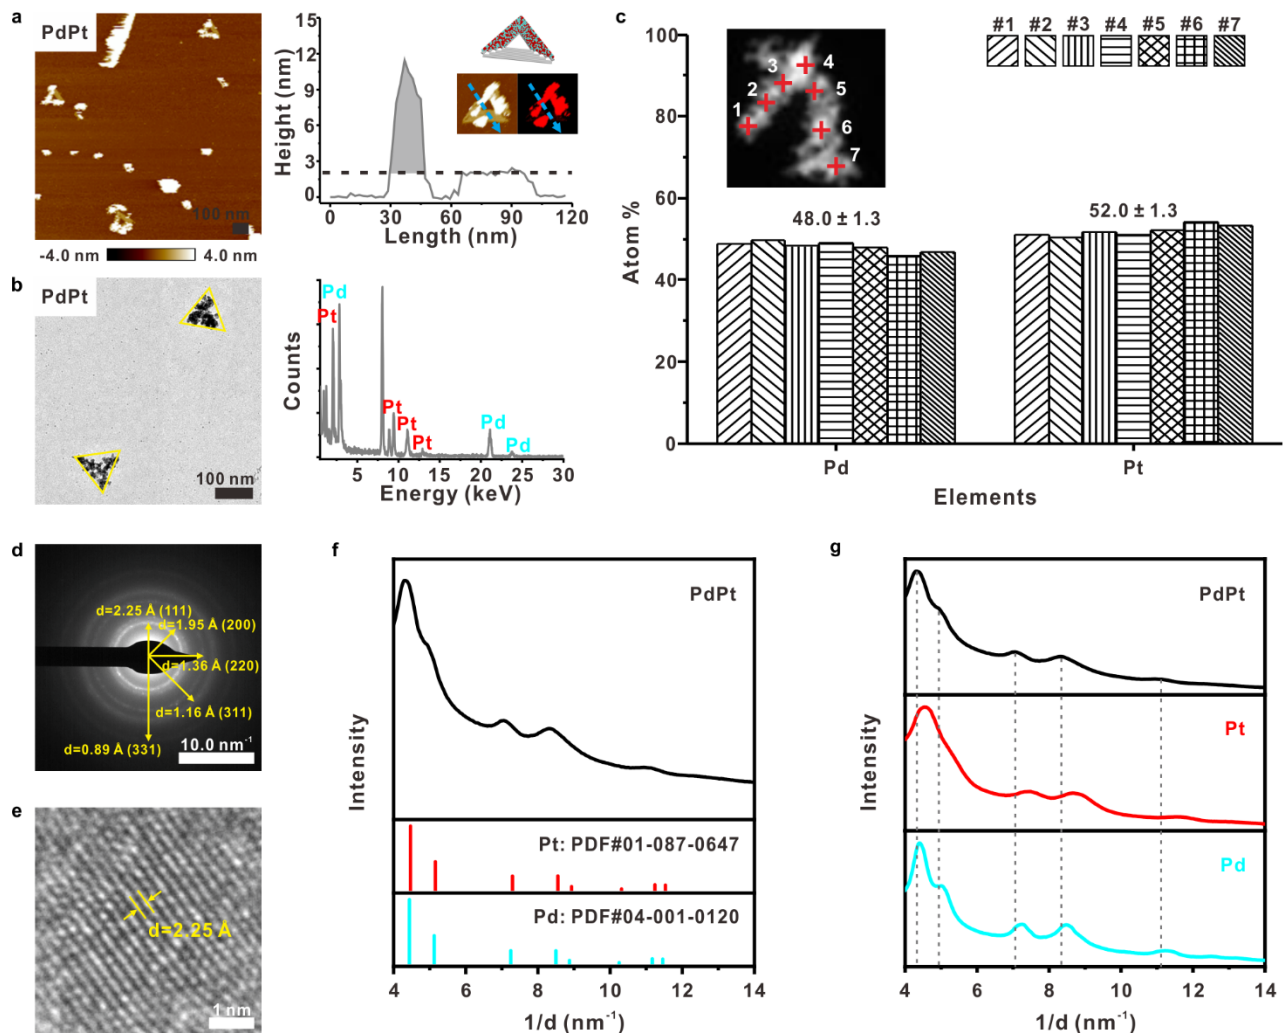

**Supplementary Figure 20.** Characterization of binary (PdPt) nanoparticles on two sides of triangular DNA origami template after DCIMP processes. (a) AFM images and the corresponding height analysis (nanoparticles average height:  $\sim 8.8$  nm above the origami surface, average FWHM:  $\sim 30.1$  nm). (b) TEM image and EDX spectrum analysis. (c) Atomic percentage distributions for each element at different sample regions of a PdPt nanoparticle, the average composition is Pd ( $48.0 \pm 1.3\%$ ), Pt ( $52.0 \pm 1.3\%$ ). (d) SAED image presents ring diffraction pattern of a polycrystalline PdPt specimen. (e) HR-TEM image of a region of PdPt nanoparticle. (f) Diffraction pattern intensity profile of PdPt specimen. (g) Comparison PdPt with individual Pd and Pt. Source data are provided as a Source Data file.

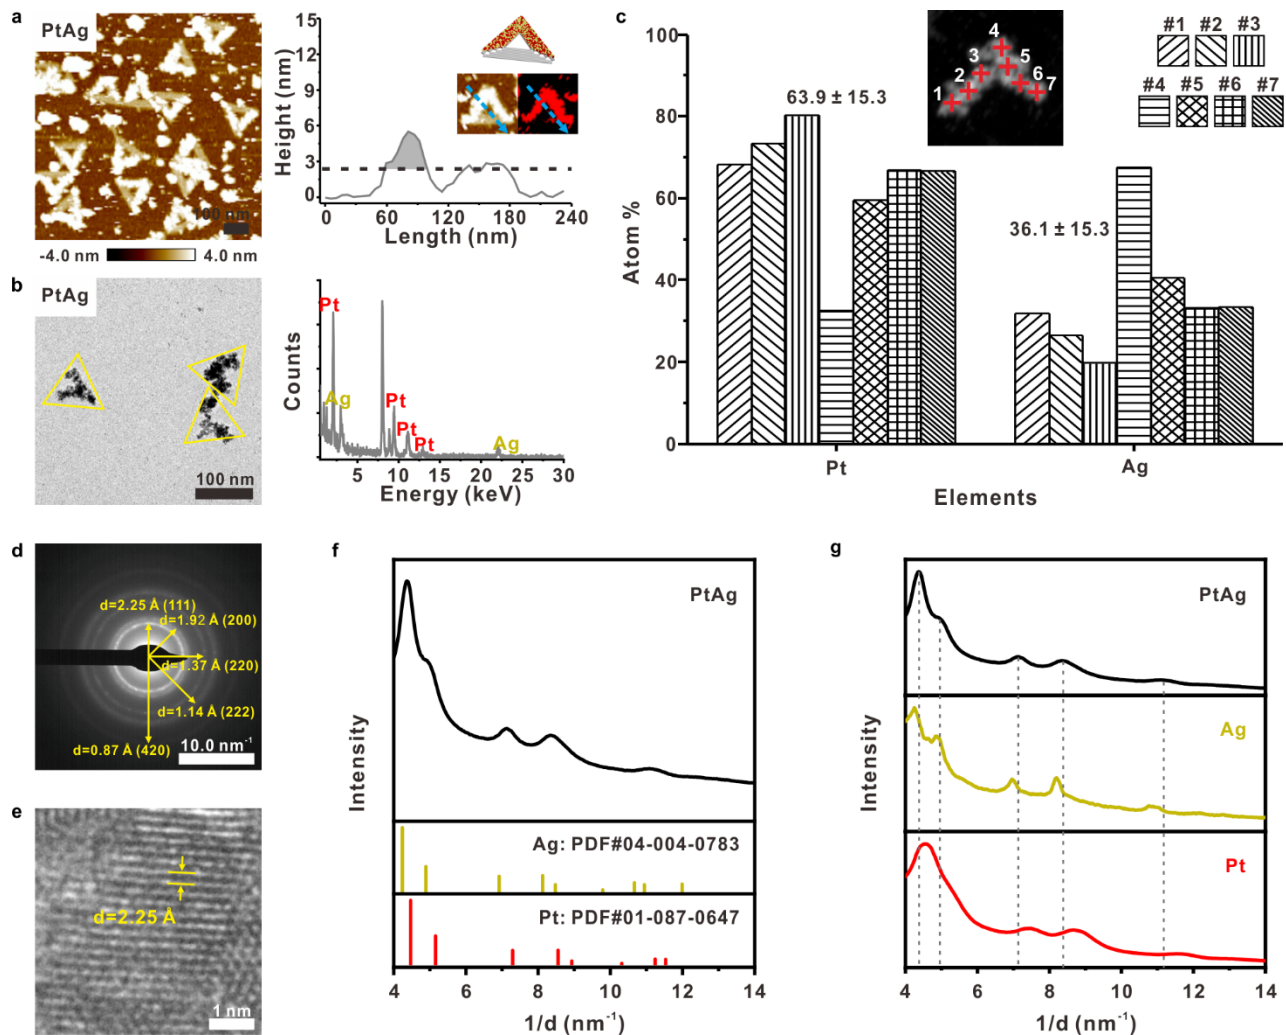

**Supplementary Figure 21.** Characterization of binary (PtAg) nanoparticles on two sides of triangular DNA origami template after DCIMP processes. (a) AFM images and the corresponding height analysis (nanoparticles average height:  $\sim 2.5$  nm above the origami surface, average FWHM:  $\sim 32.5$  nm). (b) TEM image and EDX spectrum analysis. (c) Atomic percentage distributions for each element at different sample regions of a PtAg nanoparticle, the average composition is Pt ( $63.9 \pm 15.3\%$ ), Ag ( $36.1 \pm 15.3\%$ ). (d) SAED image presents ring diffraction pattern of a polycrystalline PtAg specimen. (e) HR-TEM image of a region of PtAg nanoparticle. (f) Diffraction pattern intensity profile of PtAg specimen. (g) Comparison PtAg with individual Pt and Ag. Source data are provided as a Source Data file.

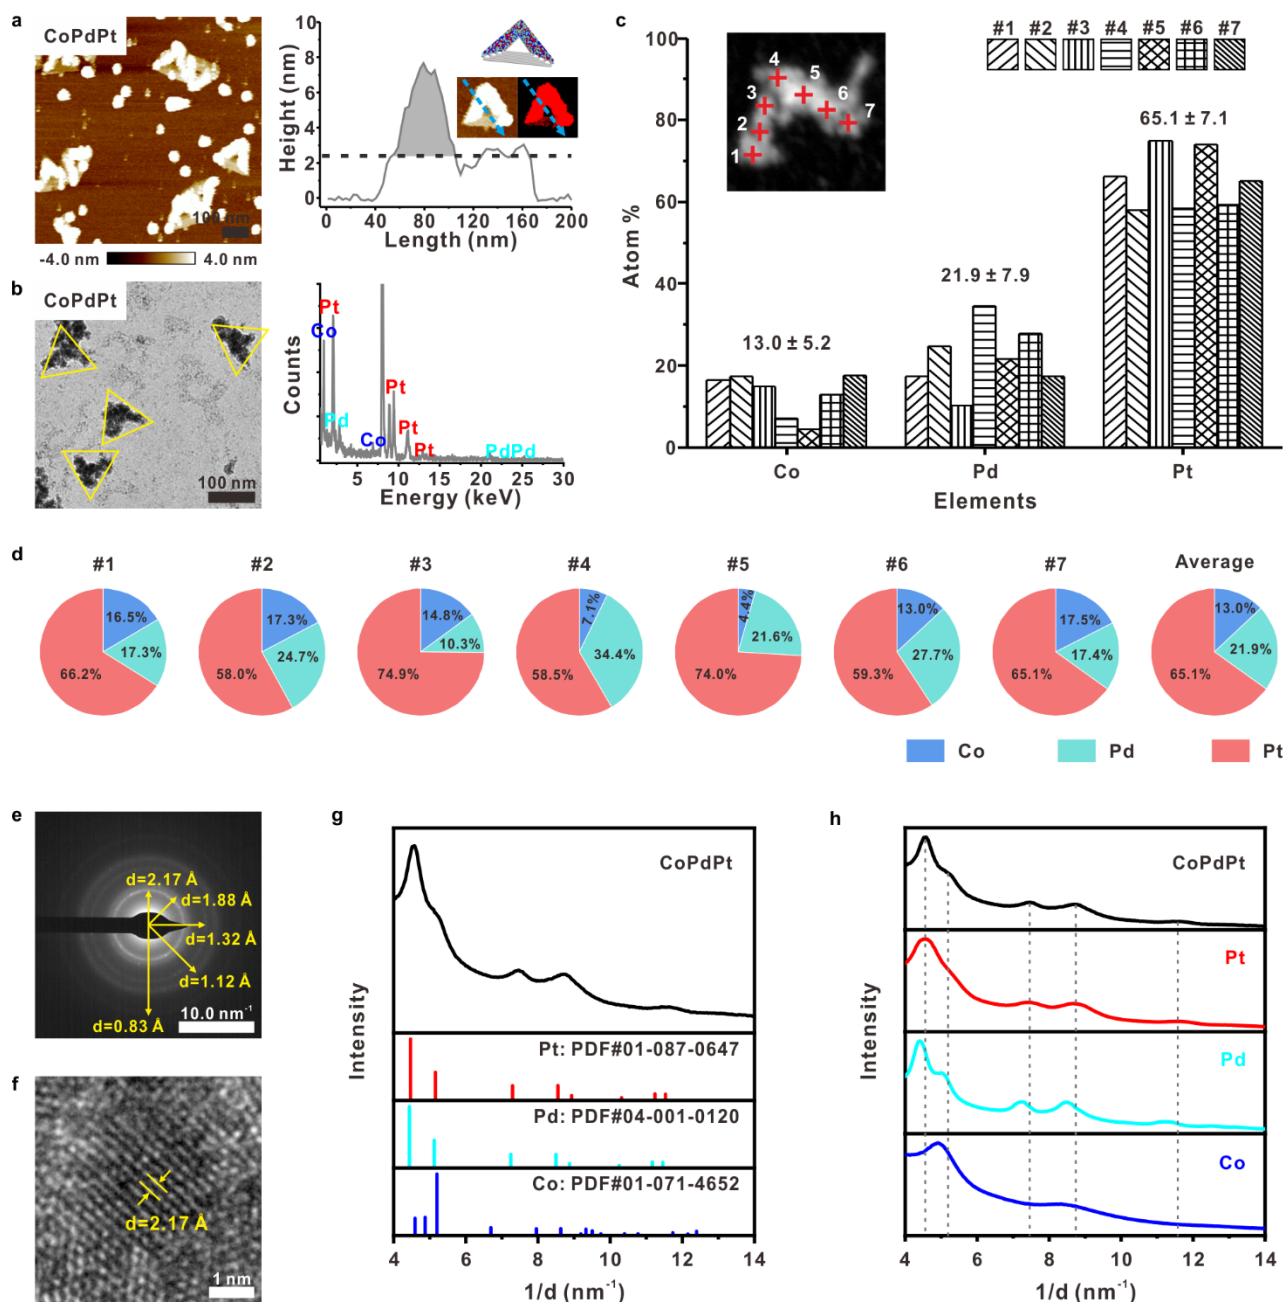

**Supplementary Figure 22.** Characterization of ternary (CoPdPt) nanoparticles on two sides of triangular DNA origami template after DCIMP processes. (a) AFM images and the corresponding height analysis (nanoparticles average height:  $\sim 4.6$  nm above the origami surface, average FWHM:  $\sim 33.2$  nm). (b) TEM image and EDX spectrum analysis. (c and d) Atomic percentage distributions for each element at different sample regions of a CoPdPt nanoparticle, the average composition is Co ( $13.0 \pm 5.2\%$ ), Pd ( $21.9 \pm 7.9\%$ ), Pt ( $65.1 \pm 7.1\%$ ). (e) SAED image presents ring diffraction pattern of a polycrystalline CoPdPt specimen. (f) HR-TEM image of a region of CoPdPt nanoparticle. (g) Diffraction pattern intensity profile of CoPdPt specimen. (h) Comparison CoPdPt with individual Co, Pd and Pt. Source data are provided as a Source Data file.



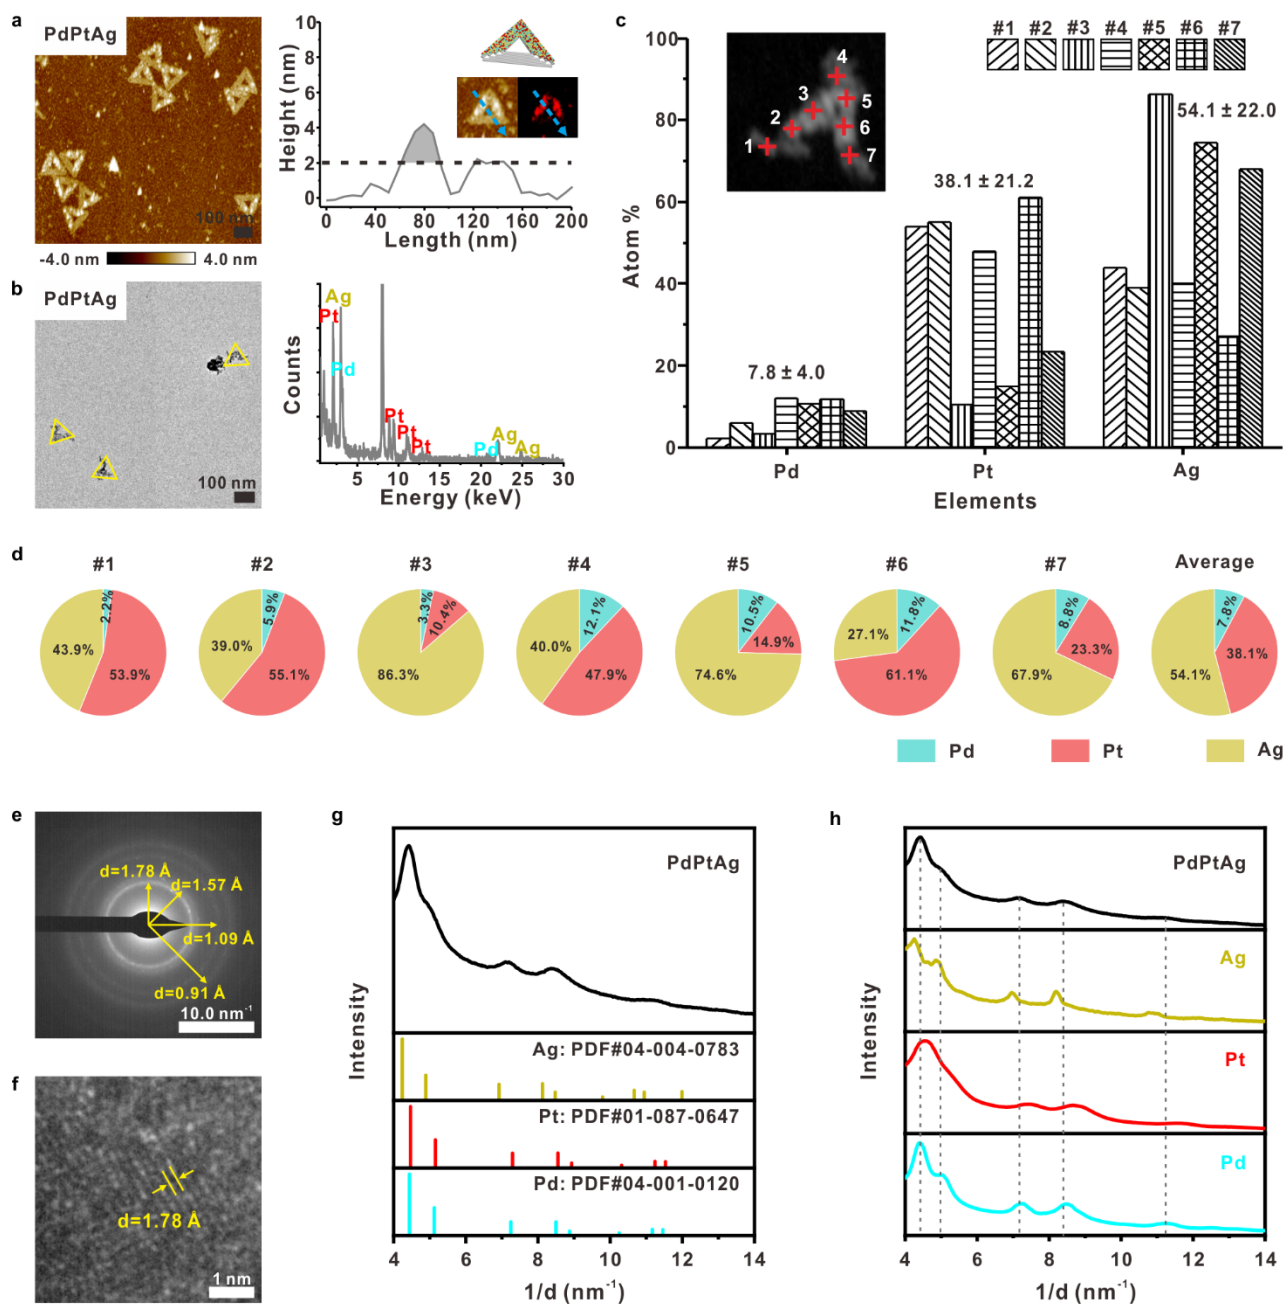

**Supplementary Figure 23.** Characterization of ternary (PdPtAg) nanoparticles on two sides of triangular DNA origami template after DCIMP processes. (a) AFM images and the corresponding height analysis (nanoparticles average height:  $\sim 2.0$  nm above the origami surface, average FWHM:  $\sim 34.1$  nm). (b) TEM image and EDX spectrum analysis. (c and d) Atomic percentage distributions for each element at different sample regions of a PdPtAg nanoparticle, the average composition is Pd ( $7.8 \pm 4.0\%$ ), Pt ( $38.1 \pm 21.2\%$ ), Ag ( $54.1 \pm 22.0\%$ ). (e) SAED image presents ring diffraction pattern of a polycrystalline PdPtAg specimen. (f) HR-TEM image of a region of PdPtAg nanoparticle. (g) Diffraction pattern intensity profile of PdPtAg specimen. (h) Comparison PdPtAg with individual Pd, Pt and Ag. Source data are provided as a Source Data file.



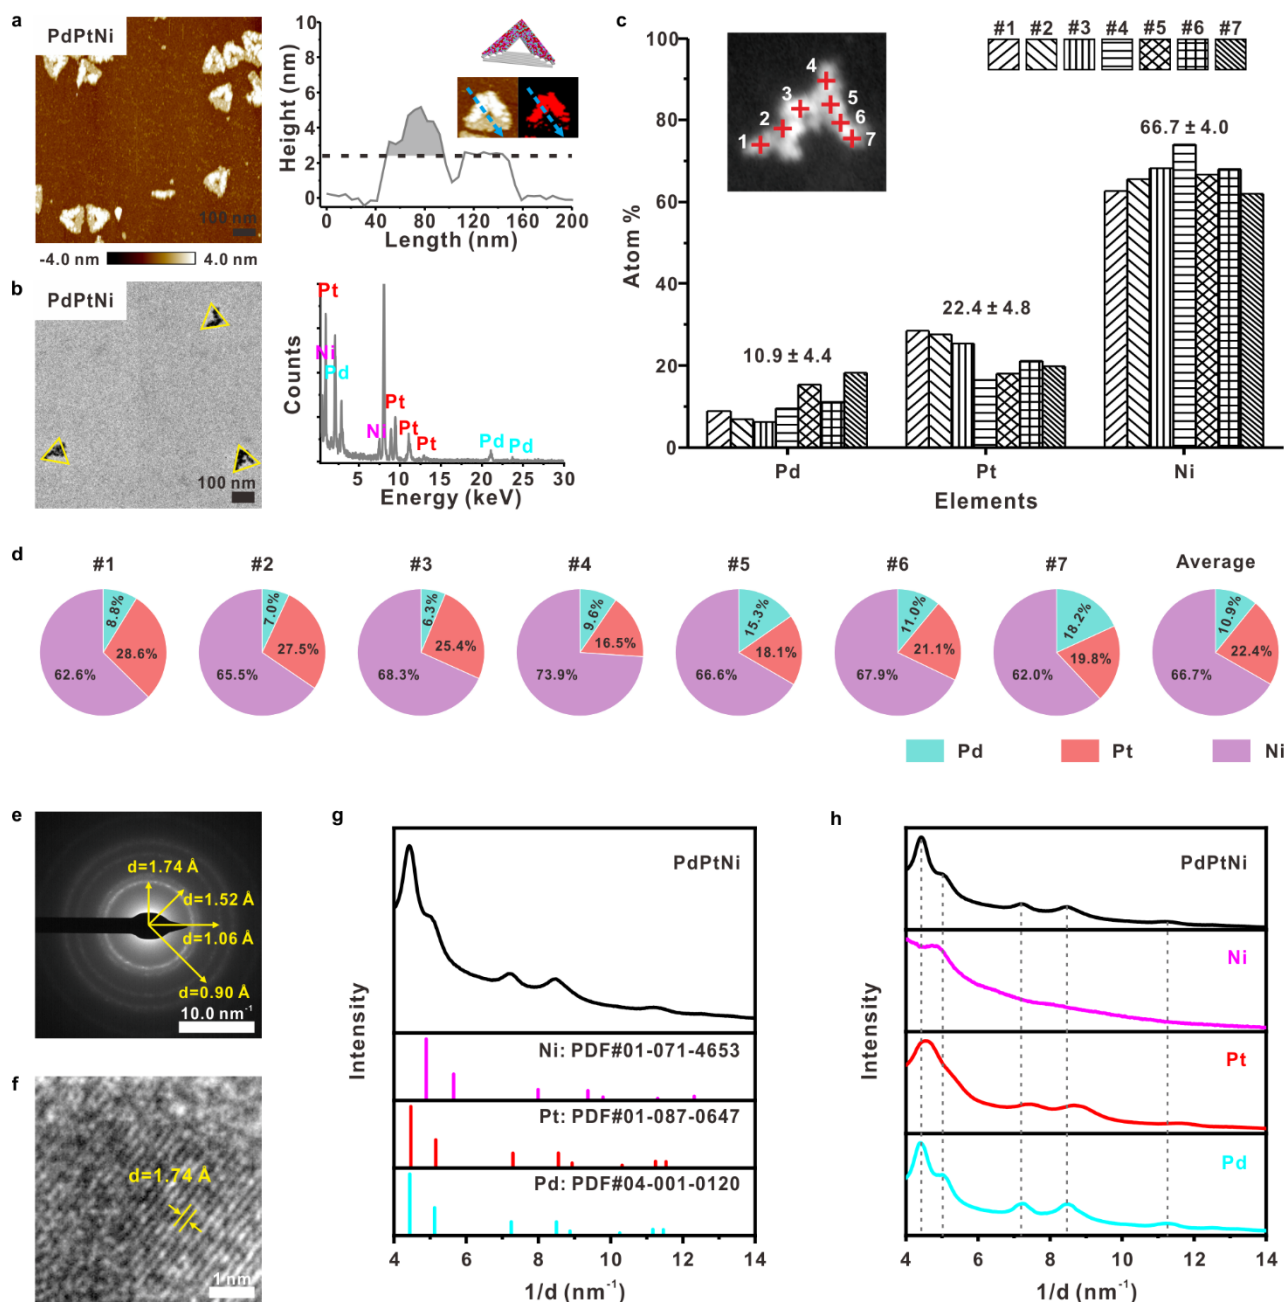

**Supplementary Figure 24.** Characterization of ternary (PdPtNi) nanoparticles on two sides of triangular DNA origami template after DCIMP processes. (a) AFM images and the corresponding height analysis (nanoparticles average height:  $\sim 2.6$  nm above the origami surface, average FWHM:  $\sim 35.6$  nm). (b) TEM image and EDX spectrum analysis. (c and d) Atomic percentage distributions for each element at different sample regions of a PdPtNi nanoparticle, the average composition is Pd ( $10.9 \pm 4.4\%$ ), Pt ( $22.4 \pm 4.8\%$ ), Ni ( $66.7 \pm 4.0\%$ ). (e) SAED image presents ring diffraction pattern of a polycrystalline PdPtNi specimen. (f) HR-TEM image of a region of PdPtNi nanoparticle. (g) Diffraction pattern intensity profile of PdPtNi specimen. (h) Comparison PdPtNi with individual Pd, Pt and Ni. Source data are provided as a Source Data file.

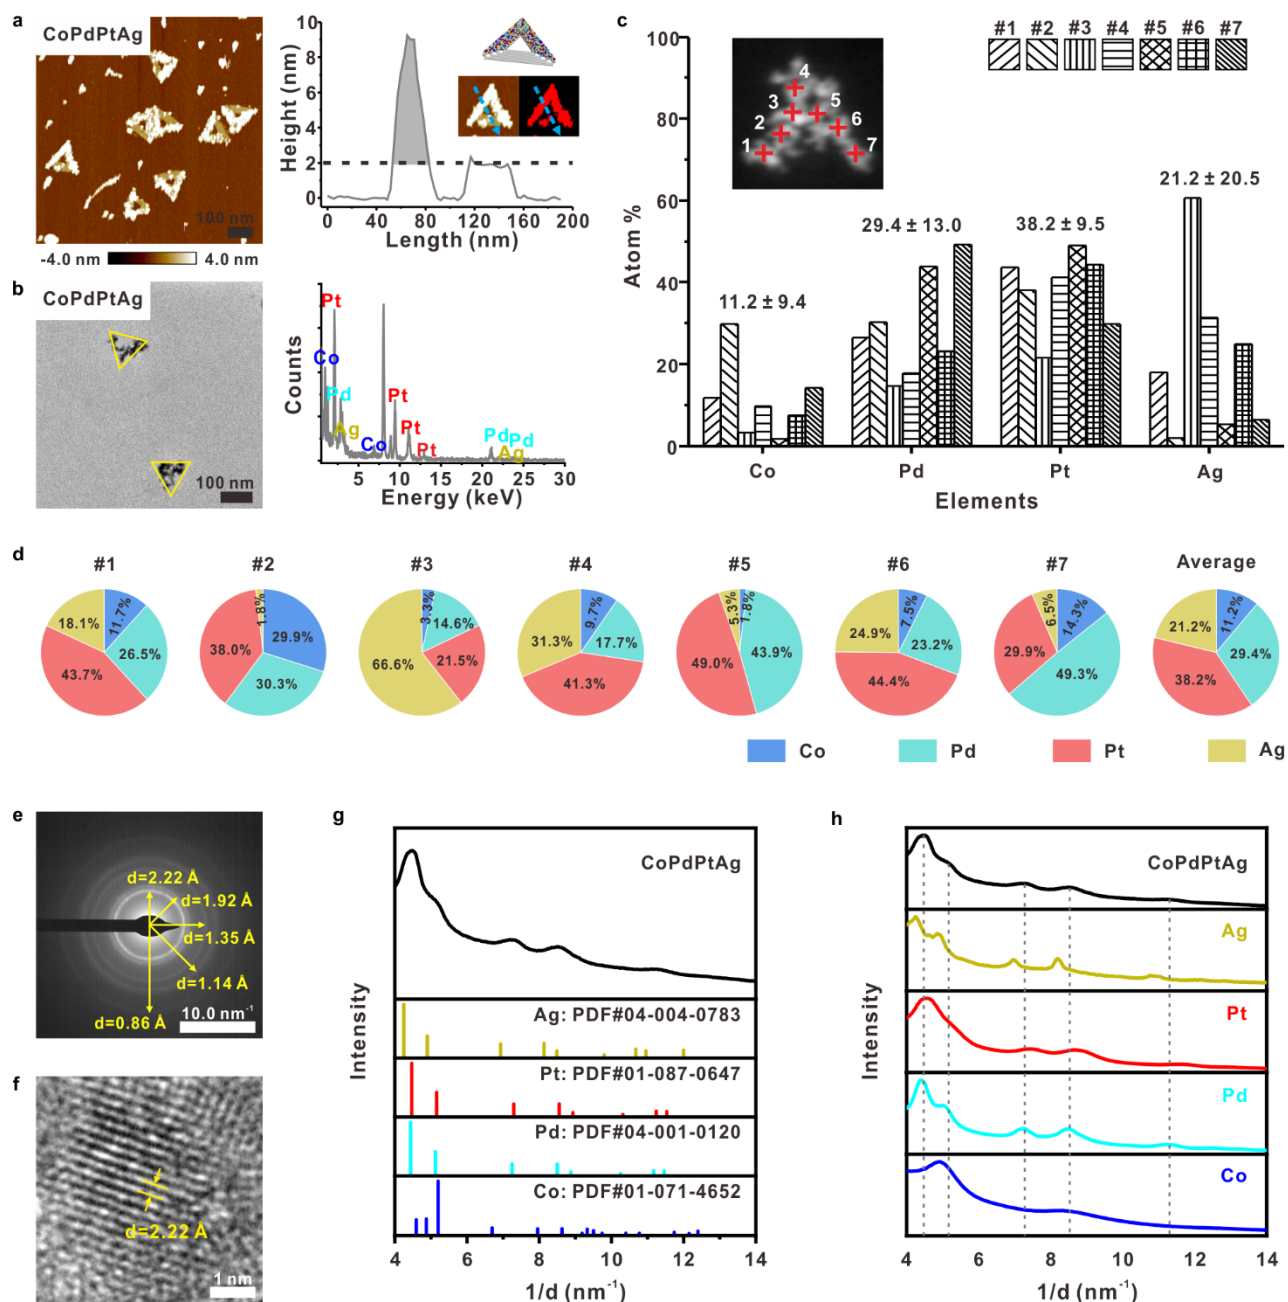

**Supplementary Figure 25.** Characterization of quaternary (CoPdPtAg) nanoparticles on two sides of triangular DNA origami template after DCIMP processes. (a) AFM images and the corresponding height analysis (nanoparticles average height:  $\sim 6.2$  nm above the origami surface, average FWHM:  $\sim 31.7$  nm). (b) TEM image and EDX spectrum analysis. (c and d) Atomic percentage distributions for each element at different sample regions of a CoPdPtAg nanoparticle, the average composition is Co ( $11.2 \pm 9.4\%$ ), Pd ( $29.4 \pm 13.0\%$ ), Pt ( $38.2 \pm 9.5\%$ ), Ag ( $21.2 \pm 20.5\%$ ). (e) SAED image presents ring diffraction pattern of a polycrystalline CoPdPtAg specimen. (f) HR-TEM image of a region of CoPdPtAg nanoparticle. (g) Diffraction pattern intensity profile of CoPdPtAg specimen. (h) Comparison CoPdPtAg with individual Co, Pd, Pt and Ni. Source data are provided as a Source Data file.

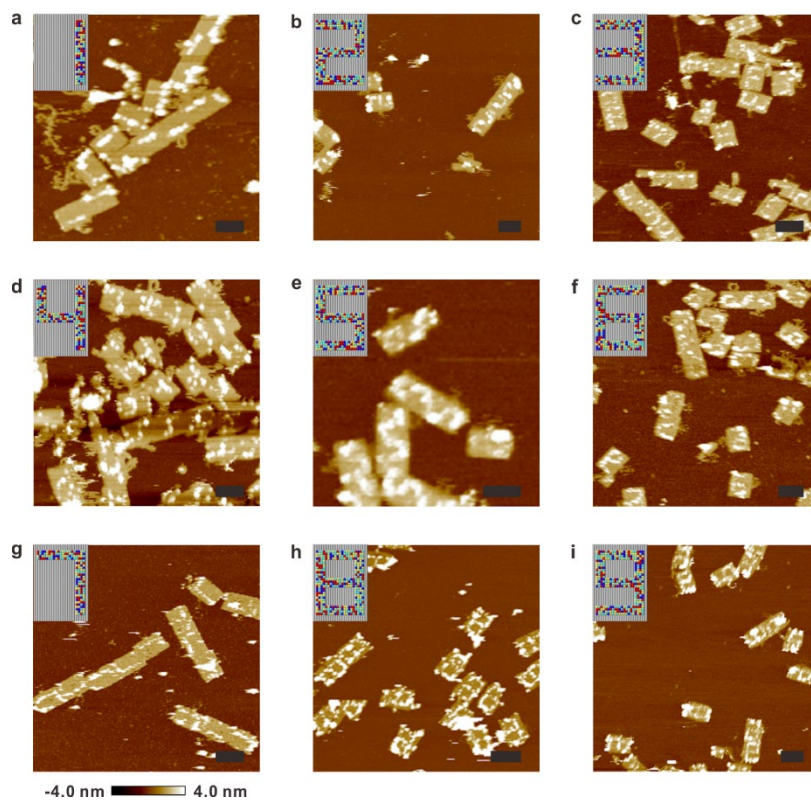

**Supplementary Figure 26.** AFM images showing digit nanopatterns from 1 to 9 fabricated by quaternary (CoPdPtAg): (a) digit ‘1’, (b) digit ‘2’, (c) digit ‘3’, (d) digit ‘4’, (e) digit ‘5’, (f) digit ‘6’, (g) digit ‘7’, (h) digit ‘8’, (i) digit ‘9’. Scale bar: 100 nm. Colour scales of AFM images: from -4.0 nm to 4.0 nm.

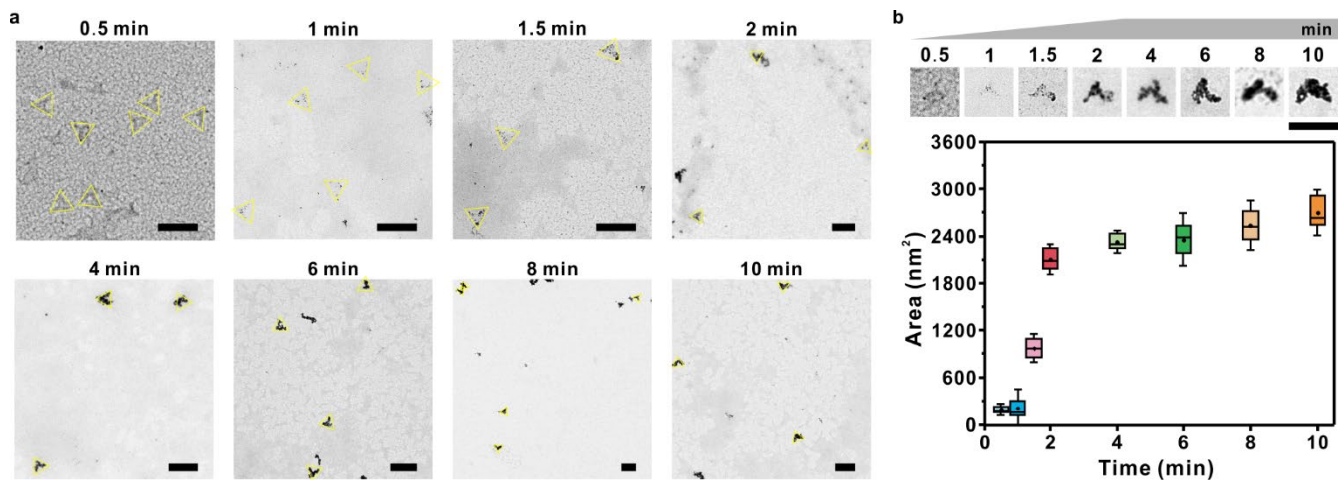

**Supplementary Figure 27.** CoPdPtAgNi morphological evolutions on triangular DNA origami template at different reaction time points. (a) TEM image. (b) Representative structure and quantitative analysis of the Pd area at different reaction time points (N=5, error bars: SD). Scale bars: 200 nm. Source data are provided as a Source Data file.



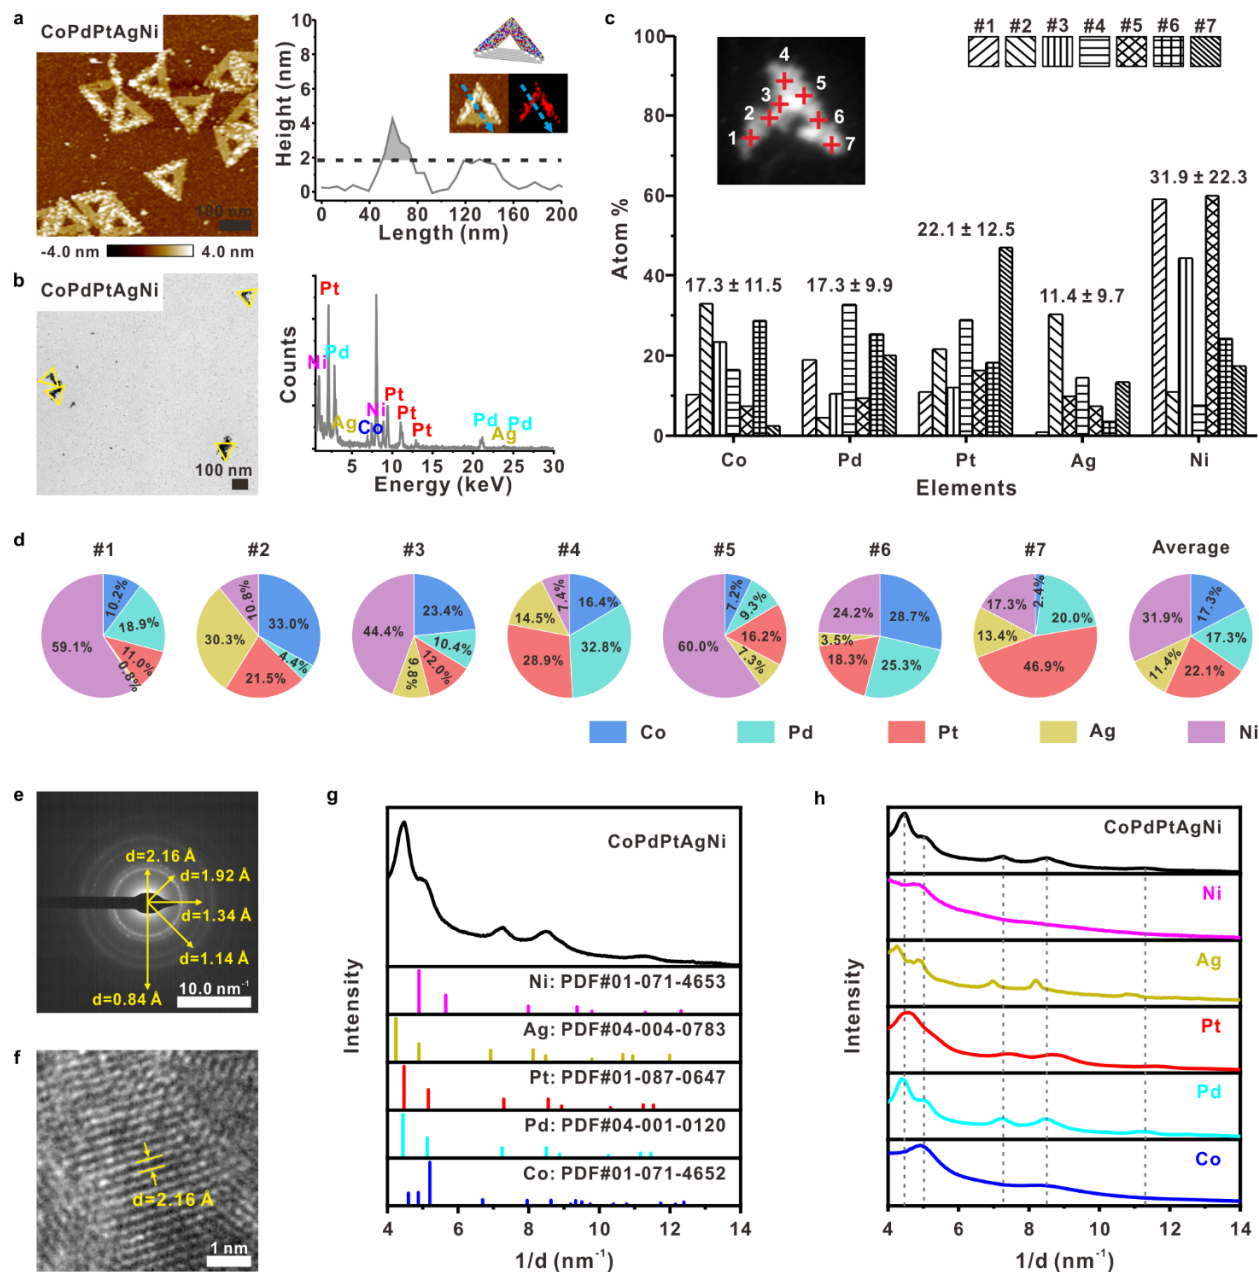

**Supplementary Figure 28.** Characterization of quinary (CoPdPtAgNi) nanoparticles on two sides of triangular DNA origami template after DCIMP processes. (a) AFM images and the corresponding height analysis (nanoparticles average height:  $\sim 2.4$  nm above the origami surface, average FWHM:  $\sim 25.5$  nm). (b) TEM image and EDX spectrum analysis. (c and d) Atomic percentage distributions for each element at different sample regions of a CoPdPtAgNi nanoparticle, the average composition is Co ( $17.3 \pm 11.5\%$ ), Pd ( $17.3 \pm 9.9\%$ ), Pt ( $22.1 \pm 12.5\%$ ), Ag ( $11.4 \pm 9.7\%$ ), Ni ( $31.9 \pm 22.3\%$ ). (e) SAED image presents ring diffraction pattern of a polycrystalline CoPdPtAgNi specimen. (f) HR-TEM image of a region of CoPdPtAgNi nanoparticle. (g) Diffraction pattern intensity profile of CoPdPtAgNi specimen. (h) Comparison CoPdPtAg with individual Co, Pd, Pt, Ag and Ni. Source data are provided as a Source Data file.

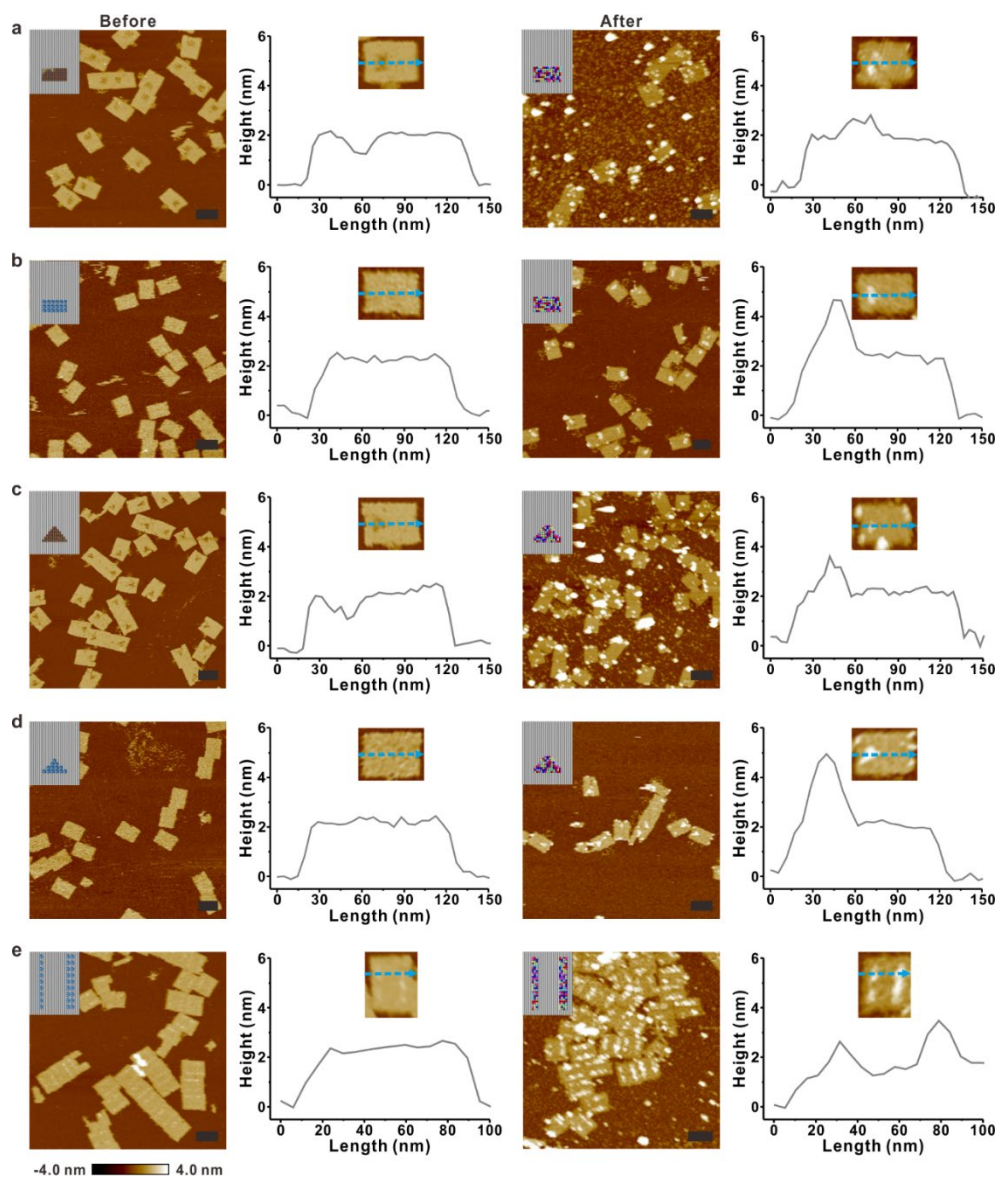

**Supplementary Figure 29.** AFM images of the quinary alloy (CoPdPtAgNi) constructed on several different origami templates and the corresponding height analysis. (a) Metallization on a DNA origami template with a rectangular hole (depth of hole:  $\sim 0.8$  nm below the origami surface, height of quinary nanoparticles:  $\sim 0.8$  nm above the origami surface. Quinary nanoparticles height:  $\sim 1.6$  nm). (b) Metallization on a rectangular template with protruding pcDNA (quinary nanoparticles height:  $\sim 2.1$  nm above the origami surface). (c) Metallization on a DNA origami template with a triangular hole (depth of hole:  $\sim 0.8$  nm below the origami surface, height of quinary nanoparticles:  $\sim 1.1$  nm above the origami surface. Quinary nanoparticles height:  $\sim 1.9$  nm). (d) Metallization on a triangular template with protruding pcDNA (quinary nanoparticles height:  $\sim 2.5$  nm above the origami surface). (e) Metallization on single and double lines of pcDNA on a rectangular DNA origami template (Linewidth of quinary nanoparticles on single line pcDNA:  $\sim 10.5$  nm,  $\sim 1.3$  nm high above the origami surface. Linewidth of quinary nanoparticles on double line pcDNA:  $\sim 15.8$  nm,  $\sim 1.7$  nm high above the origami surface). Scale bars: 100 nm. Colour scales of AFM images: from  $-4.0$  nm to  $4.0$  nm. Source data are provided as a Source Data file.



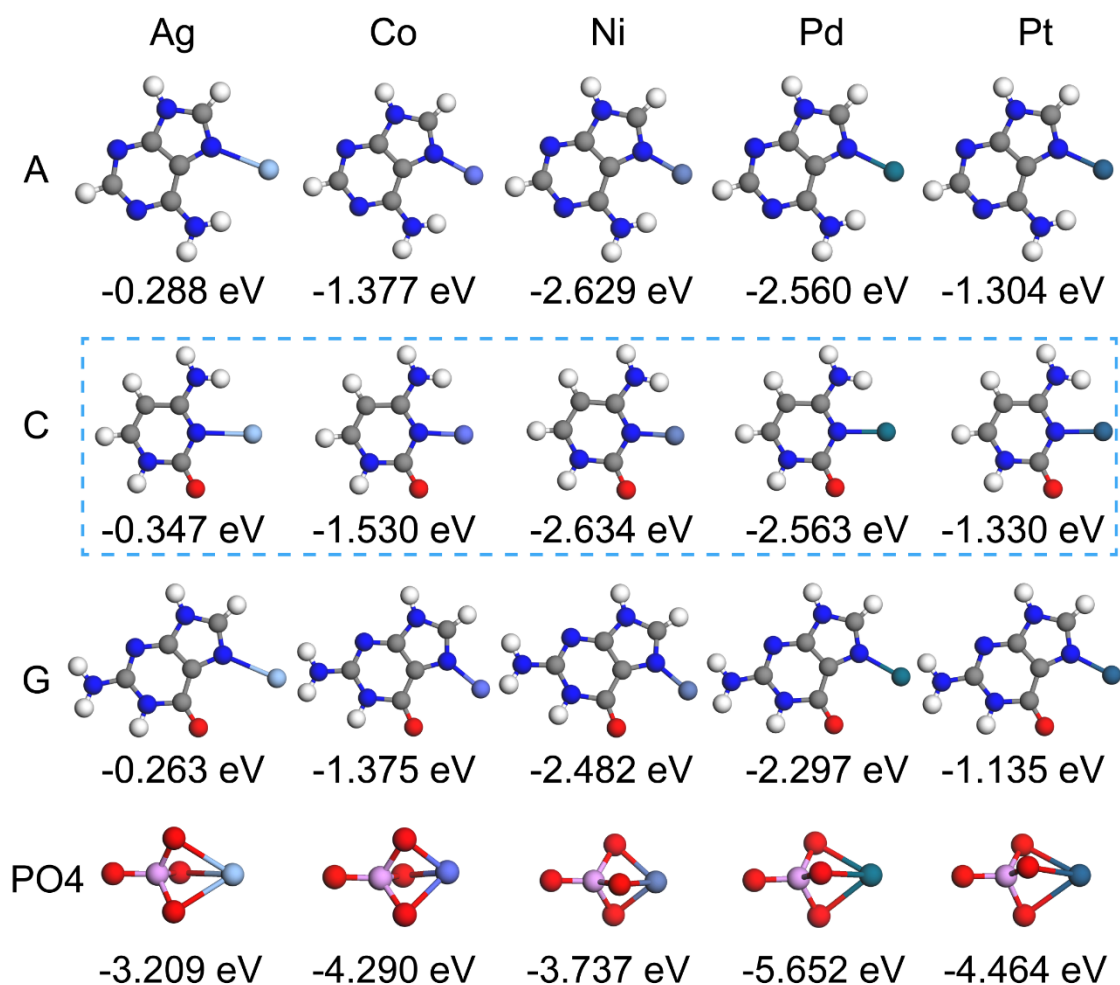

**Supplementary Figure 30.** Geometric optimized structures and corresponding binding energy between metal atoms and bases from DFT calculations. The blue dash box indicated the most stable complexes from the three bases.

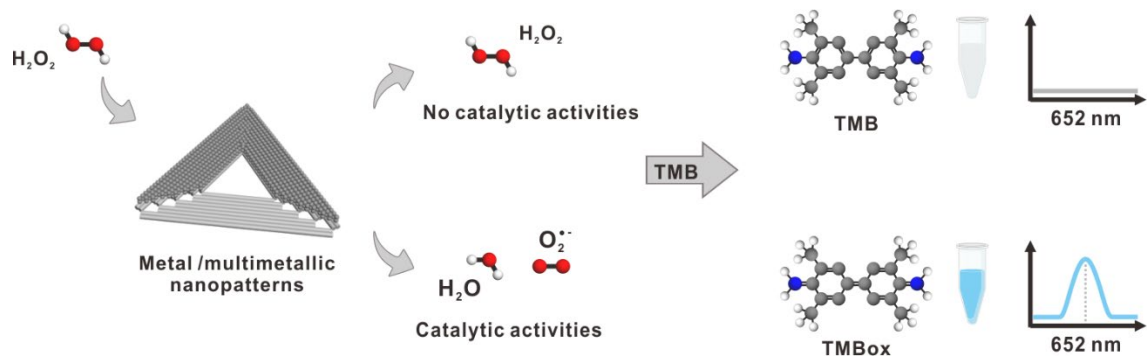

**Supplementary Figure 31.** Schematic of the peroxidase-like catalytic process.

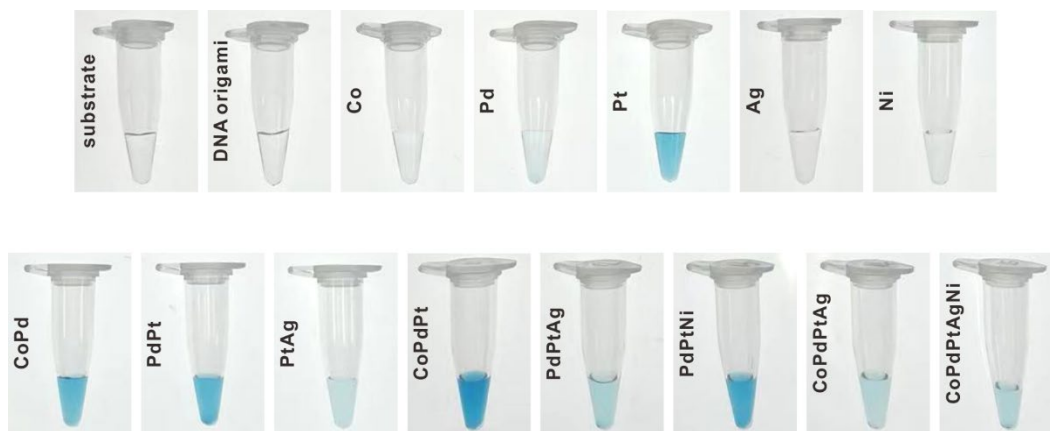

**Supplementary Figure 32.** Photos of TMB solution after 2 minutes of catalytic reaction.

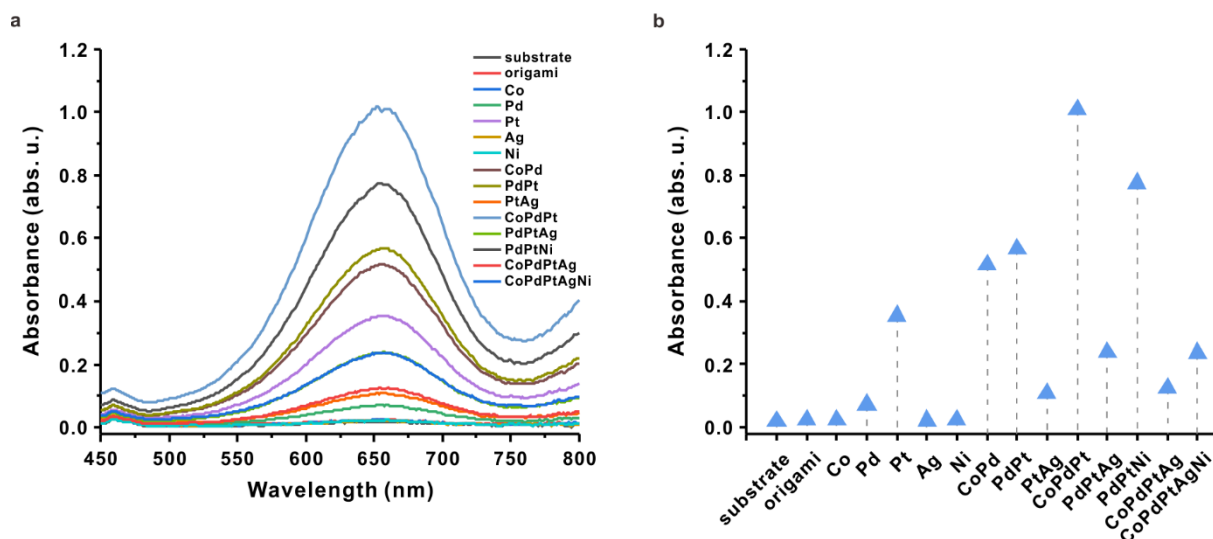

**Supplementary Figure 33.** Catalytic behaviours of metal and multimetallic nanopatterns. (a) Absorption spectra of nanopattern samples in reaction system. (b) Absorption at 652 nm. Source data are provided as a Source Data file.

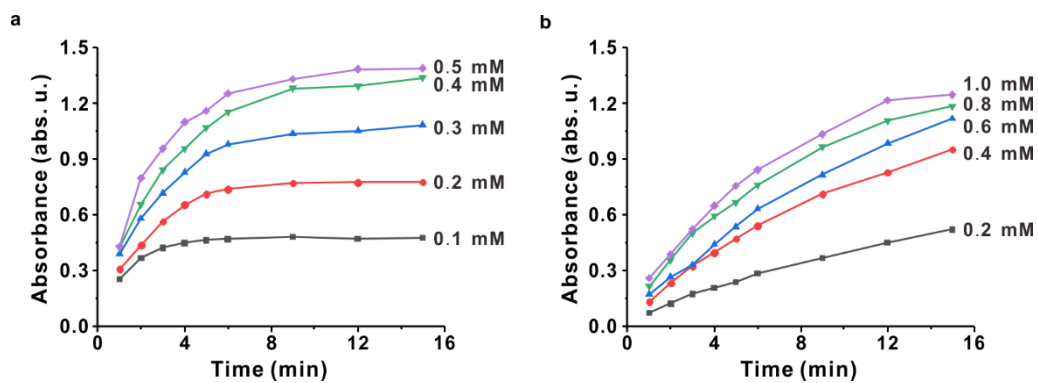

**Supplementary Figure 34.** Monitoring of time-dependent catalytic kinetics of CoPdPt nanopatterns in different conditions. (a) Constant  $20 \text{ mM H}_2\text{O}_2$  with different concentrations of TMB (0.1-0.5 mM). (b) Constant  $1 \text{ mM TMB}$  with different concentrations of  $\text{H}_2\text{O}_2$  (0.2-1.0 mM). Source data are provided as a Source Data file.



**Supplementary Table 1** Coordination bond energies (in eV) of metal ions (geometric optimized structure) to DNA.

| <b>Metal ions</b>                                    | <b>A</b> | <b>G</b> | <b>C</b> | <b>T</b> | <b>Phosphate</b> |
|------------------------------------------------------|----------|----------|----------|----------|------------------|
| Magnesium: $[\text{Mg}(\text{H}_2\text{O})_4]^{2+}$  | -0.74    | -0.80    | -0.59    | -0.31    | -1.05            |
| Silver: $[\text{Ag}(\text{H}_2\text{O})]^+$          | -1.03    | -1.31    | -1.20    | -0.41    | 0.12             |
| Cobalt: $\text{Co}(\text{H}_2\text{O})_2\text{Cl}_2$ | -1.21    | -0.89    | -0.76    | -0.71    | -1.43            |
| Nickel: $\text{Ni}(\text{H}_2\text{O})_2\text{Cl}_2$ | -1.15    | -1.21    | -1.65    | -0.87    | -1.83            |
| Palladium: $[\text{PdCl}_4]^{2-}$                    | -2.83    | -2.34    | -2.09    | -0.79    | -1.90            |
| Platinum: $[\text{PtCl}_4]^{2-}$                     | -2.98    | -2.10    | -2.87    | -1.08    | -1.44            |

**Supplementary Table 2** Oxidation-reduction potentials of metal ion precursor.

| <b>Metal</b>            | $\text{Co}^{2+}/\text{Co}$ | $[\text{PtCl}_4]^{2-}/\text{Pt}$ | $[\text{PdCl}_4]^{2-}/\text{Pd}$ | $\text{Ag}^+/\text{Ag}$ | $\text{Ni}^{2+}/\text{Ni}$ |
|-------------------------|----------------------------|----------------------------------|----------------------------------|-------------------------|----------------------------|
| <b><math>E^0</math></b> | -0.28 V                    | 0.755 V                          | 0.591 V                          | 0.7996 V                | -0.257 V                   |

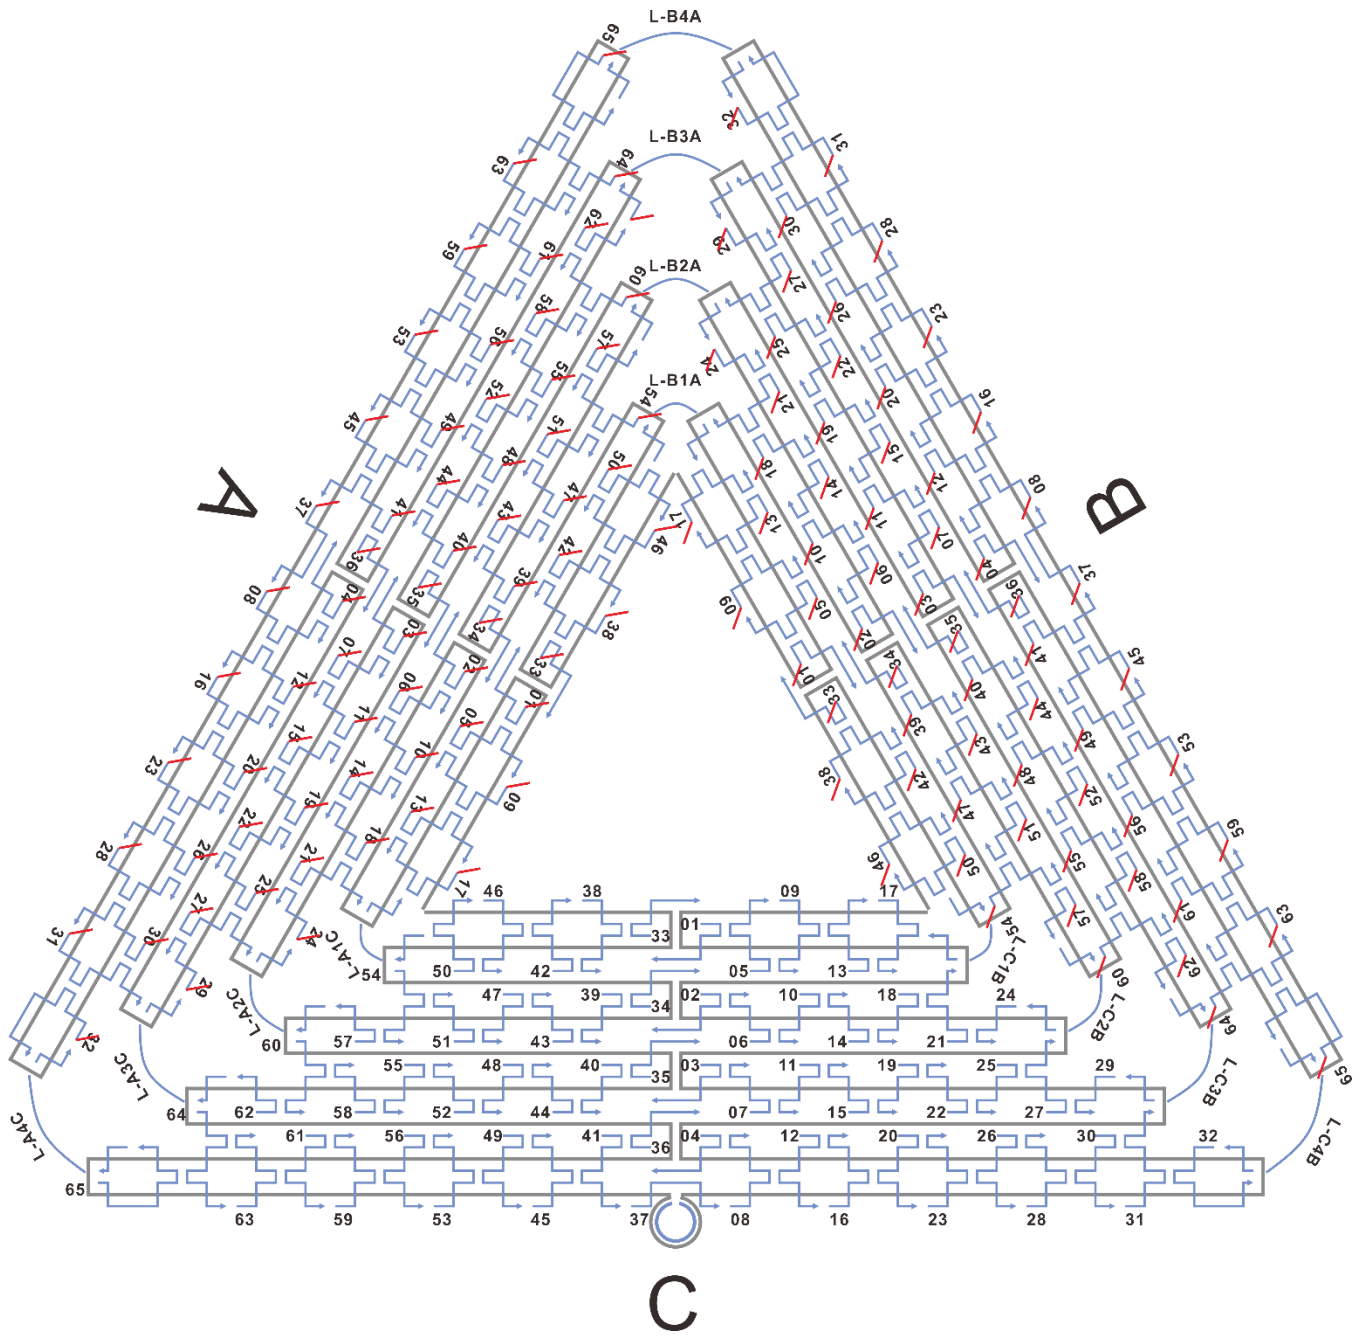

**Supplementary Figure 35.** Schematic of pcDNA on two sides pattern of triangular DNA origami template.

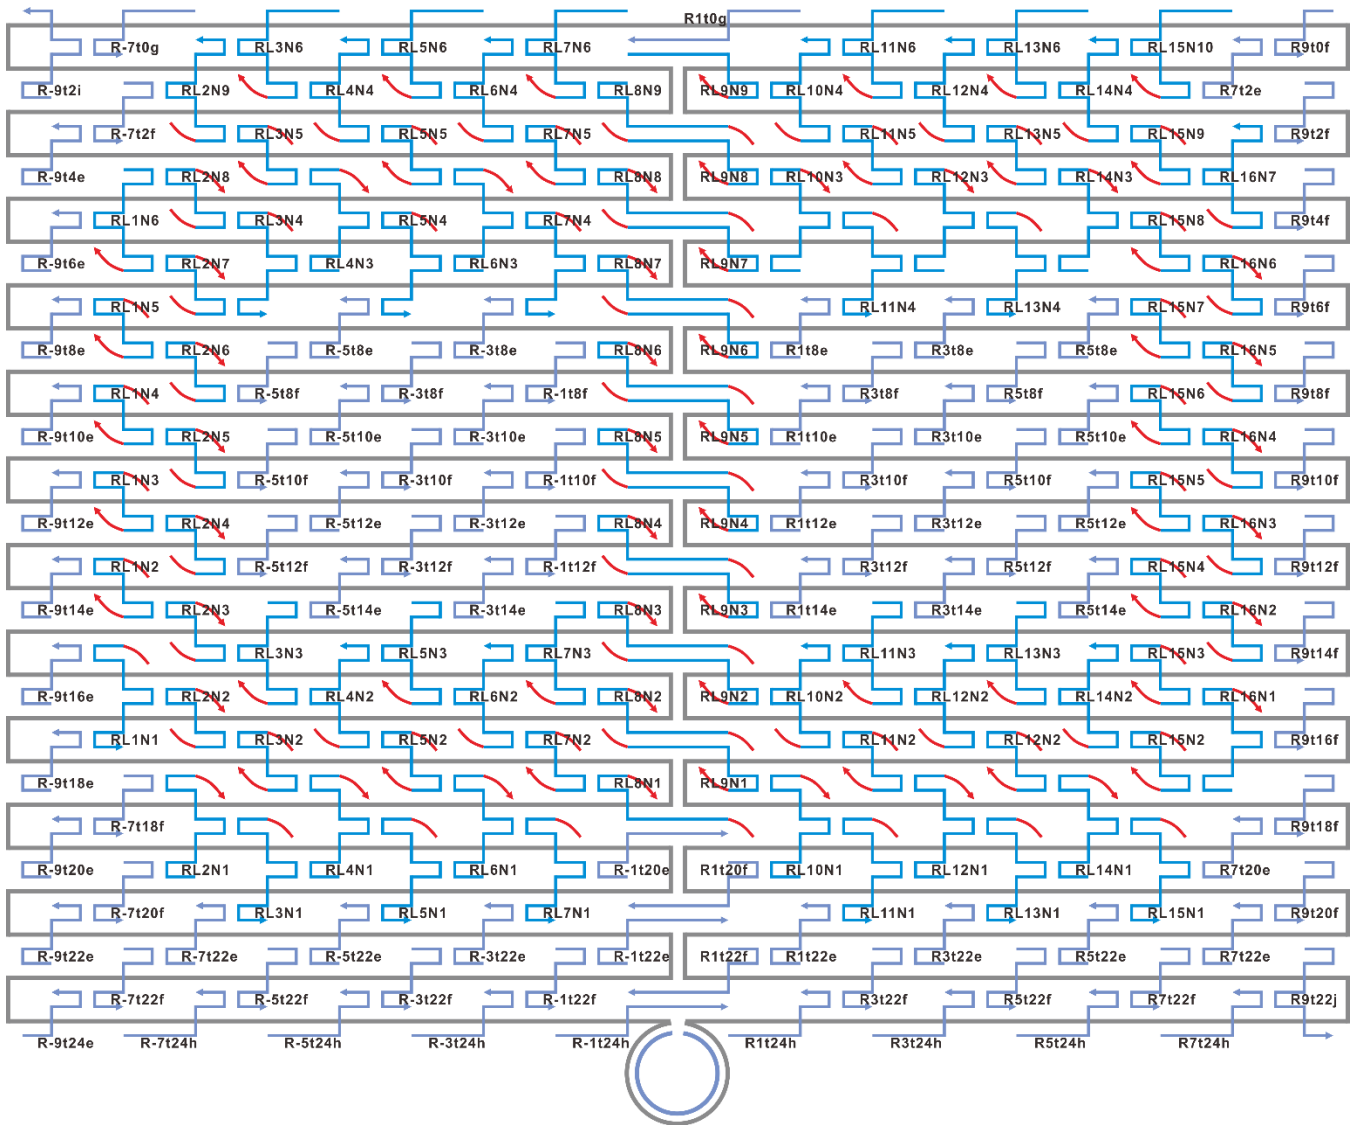

**Supplementary Figure 36.** Schematic of pcDNA on digit 8 pattern of rectangular DNA origami template.

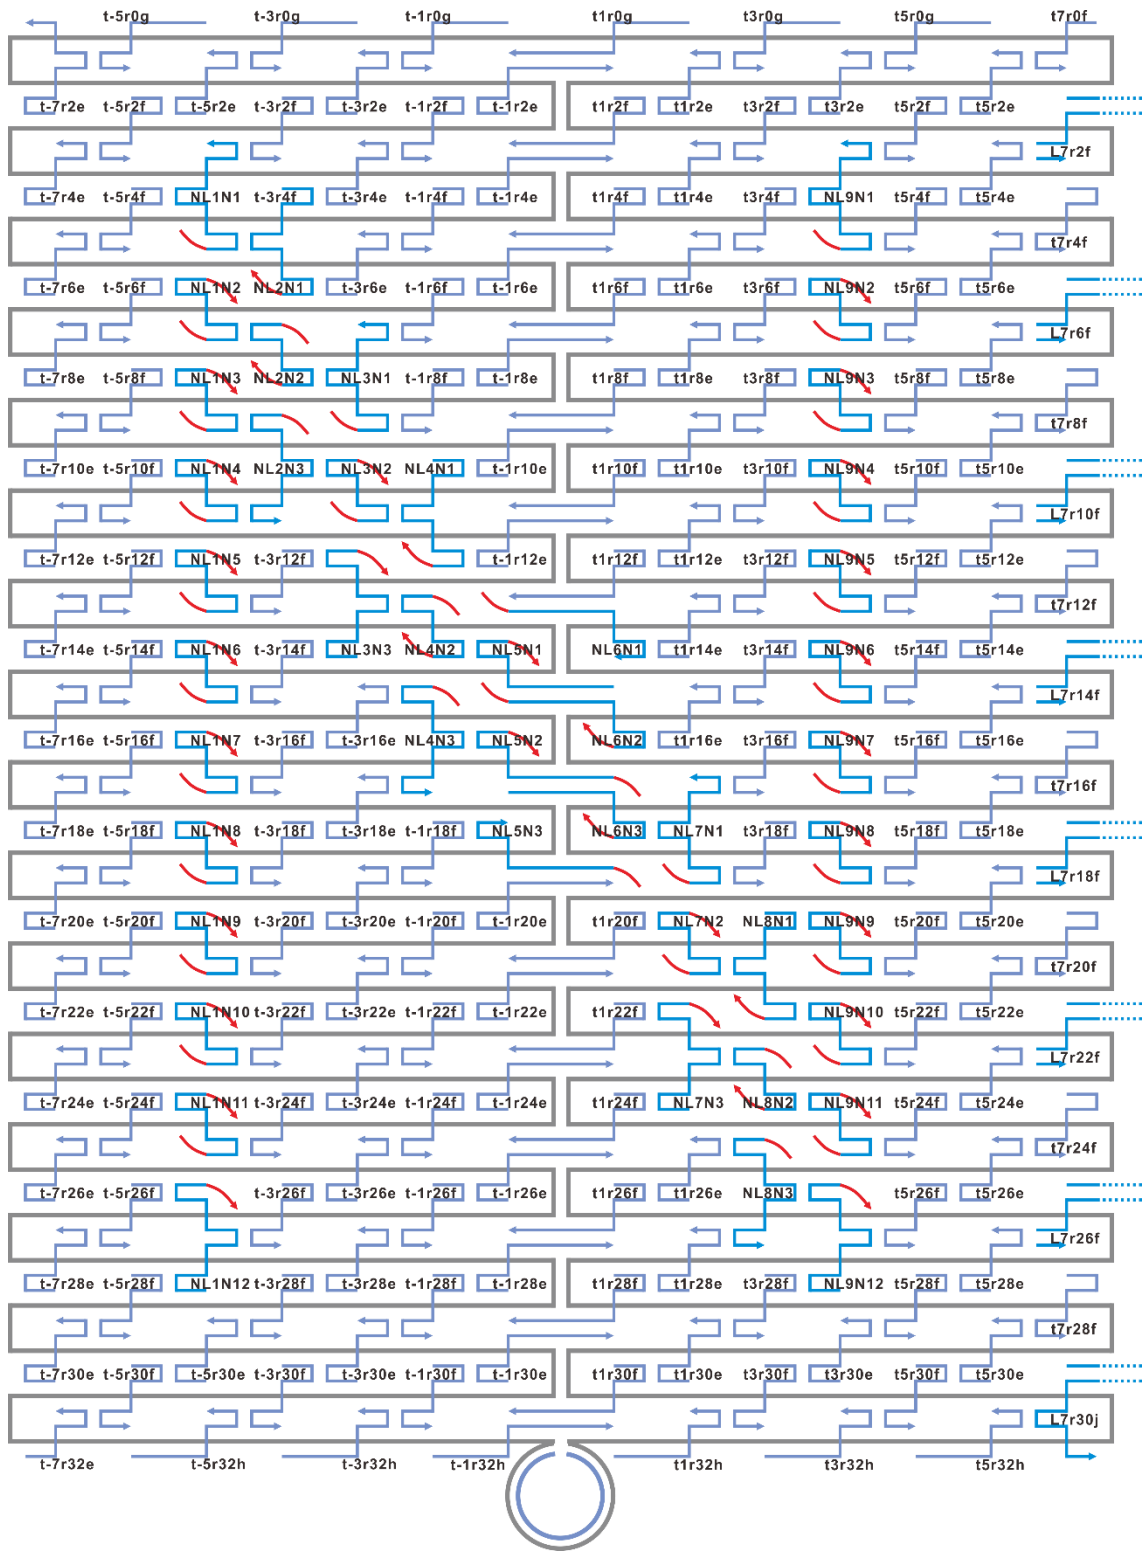

**Supplementary Figure 37.** Schematic of pcDNA on alphabet ‘N’ pattern of tall rectangular DNA origami template.

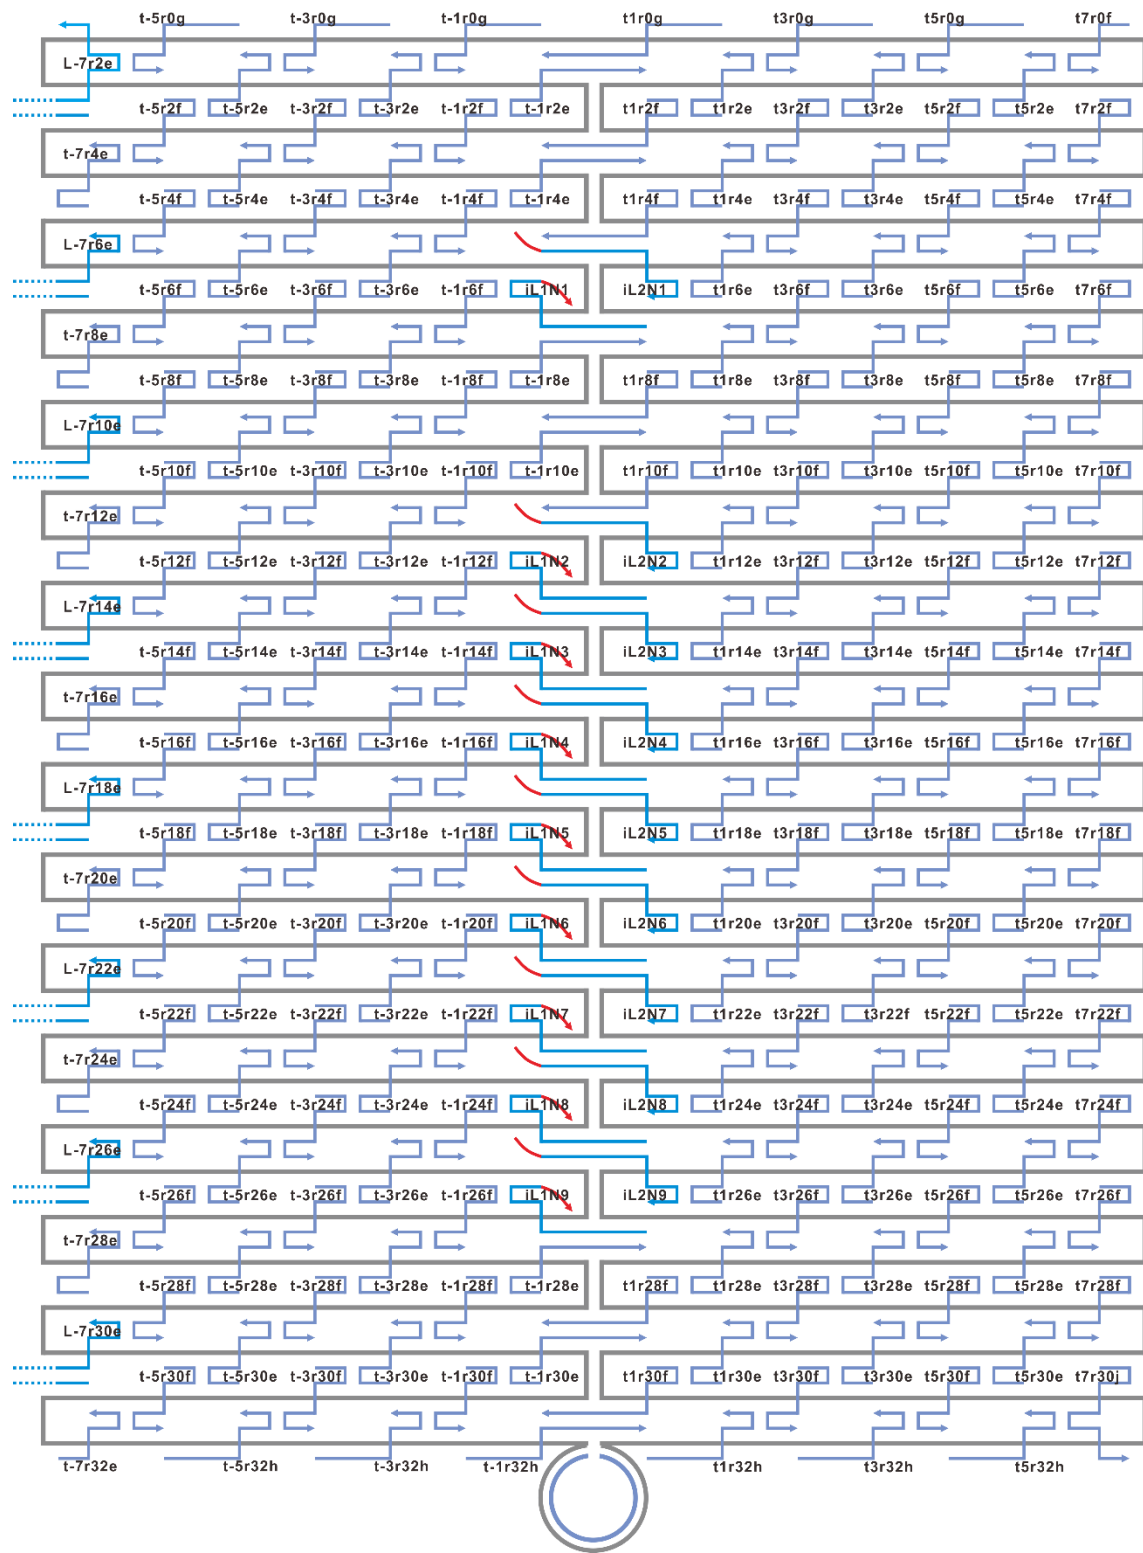

**Supplementary Figure 38.** Schematic of pcDNA on alphabet ‘i’ pattern of tall rectangular DNA origami template.



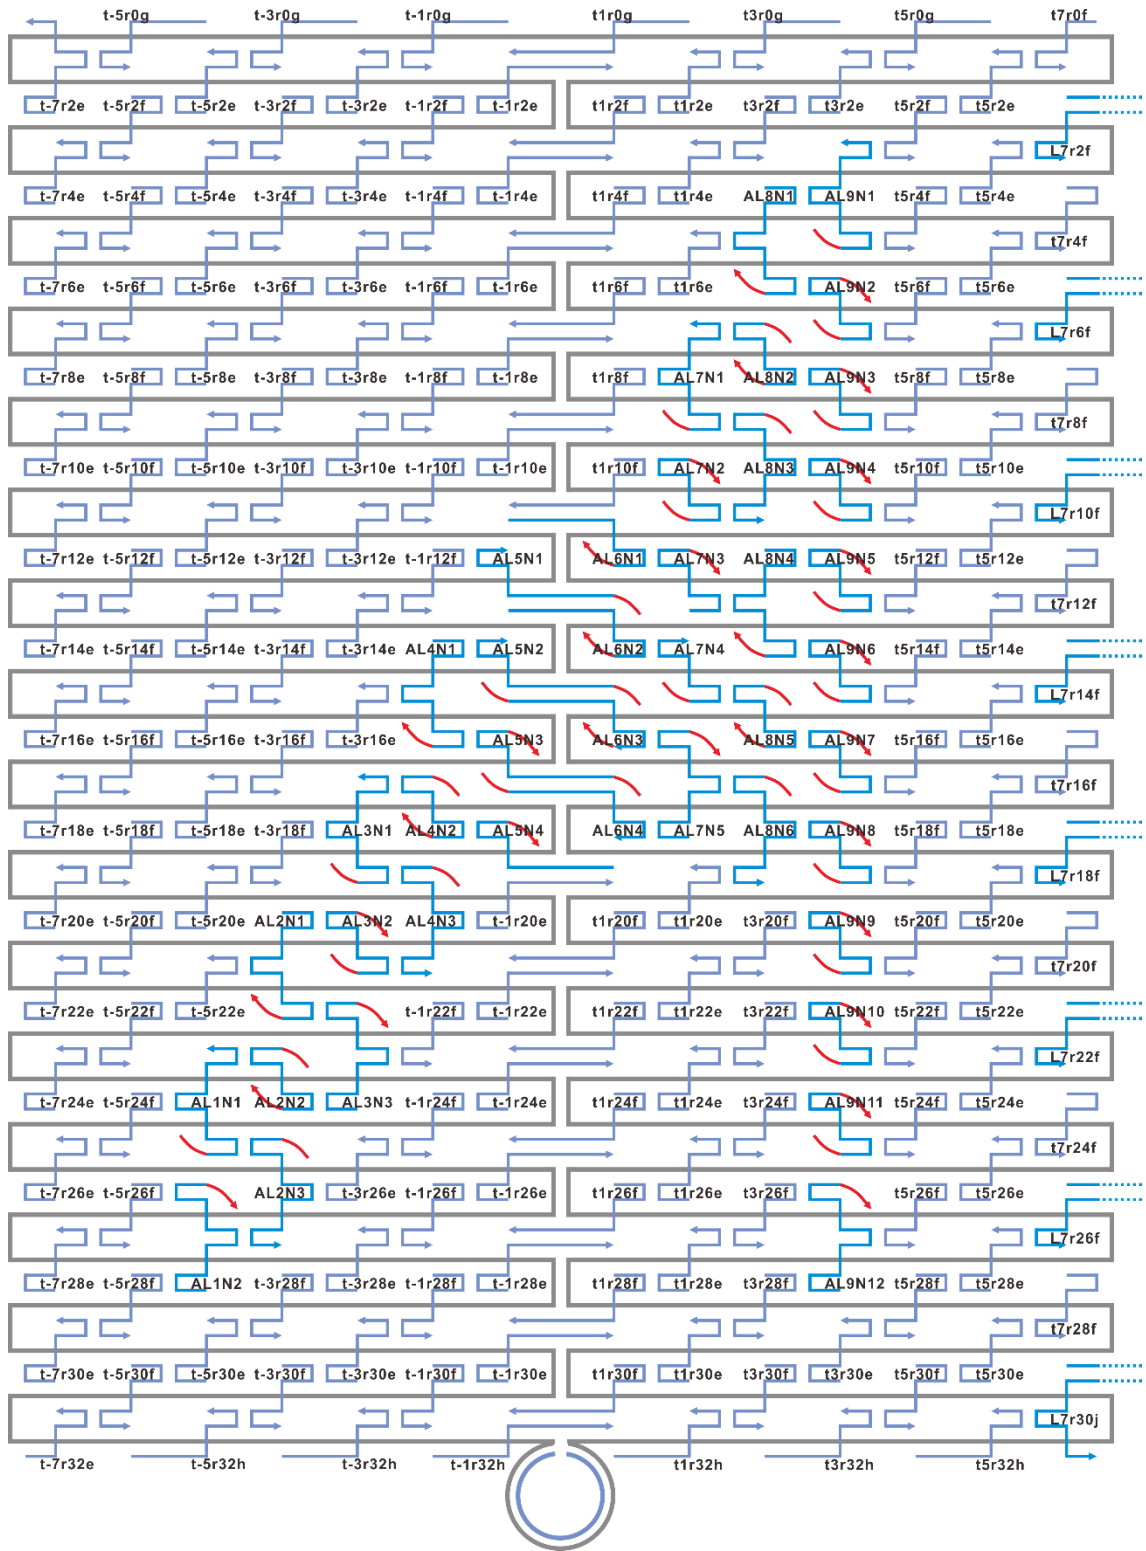

**Supplementary Figure 39.** Schematic of pcDNA on alphabet 'A' pattern of tall rectangular DNA origami template.

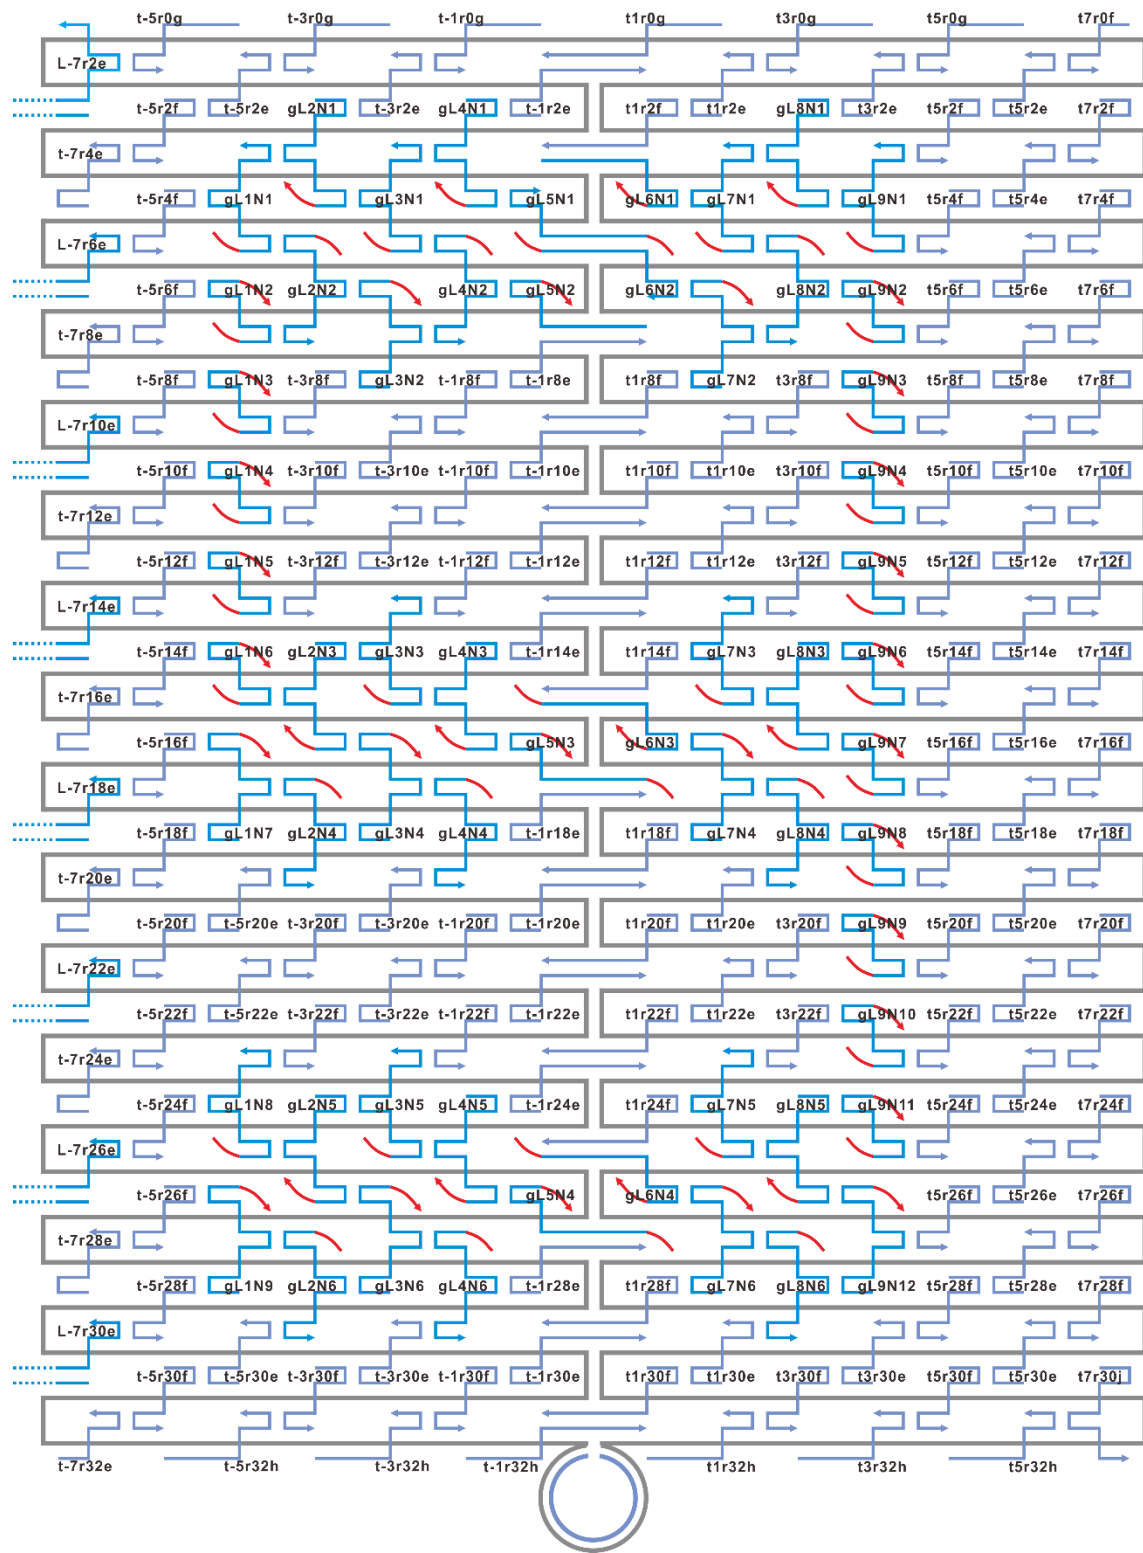

**Supplementary Figure 40.** Schematic of pcDNA on alphabet ‘g’ pattern of tall rectangular DNA origami template.

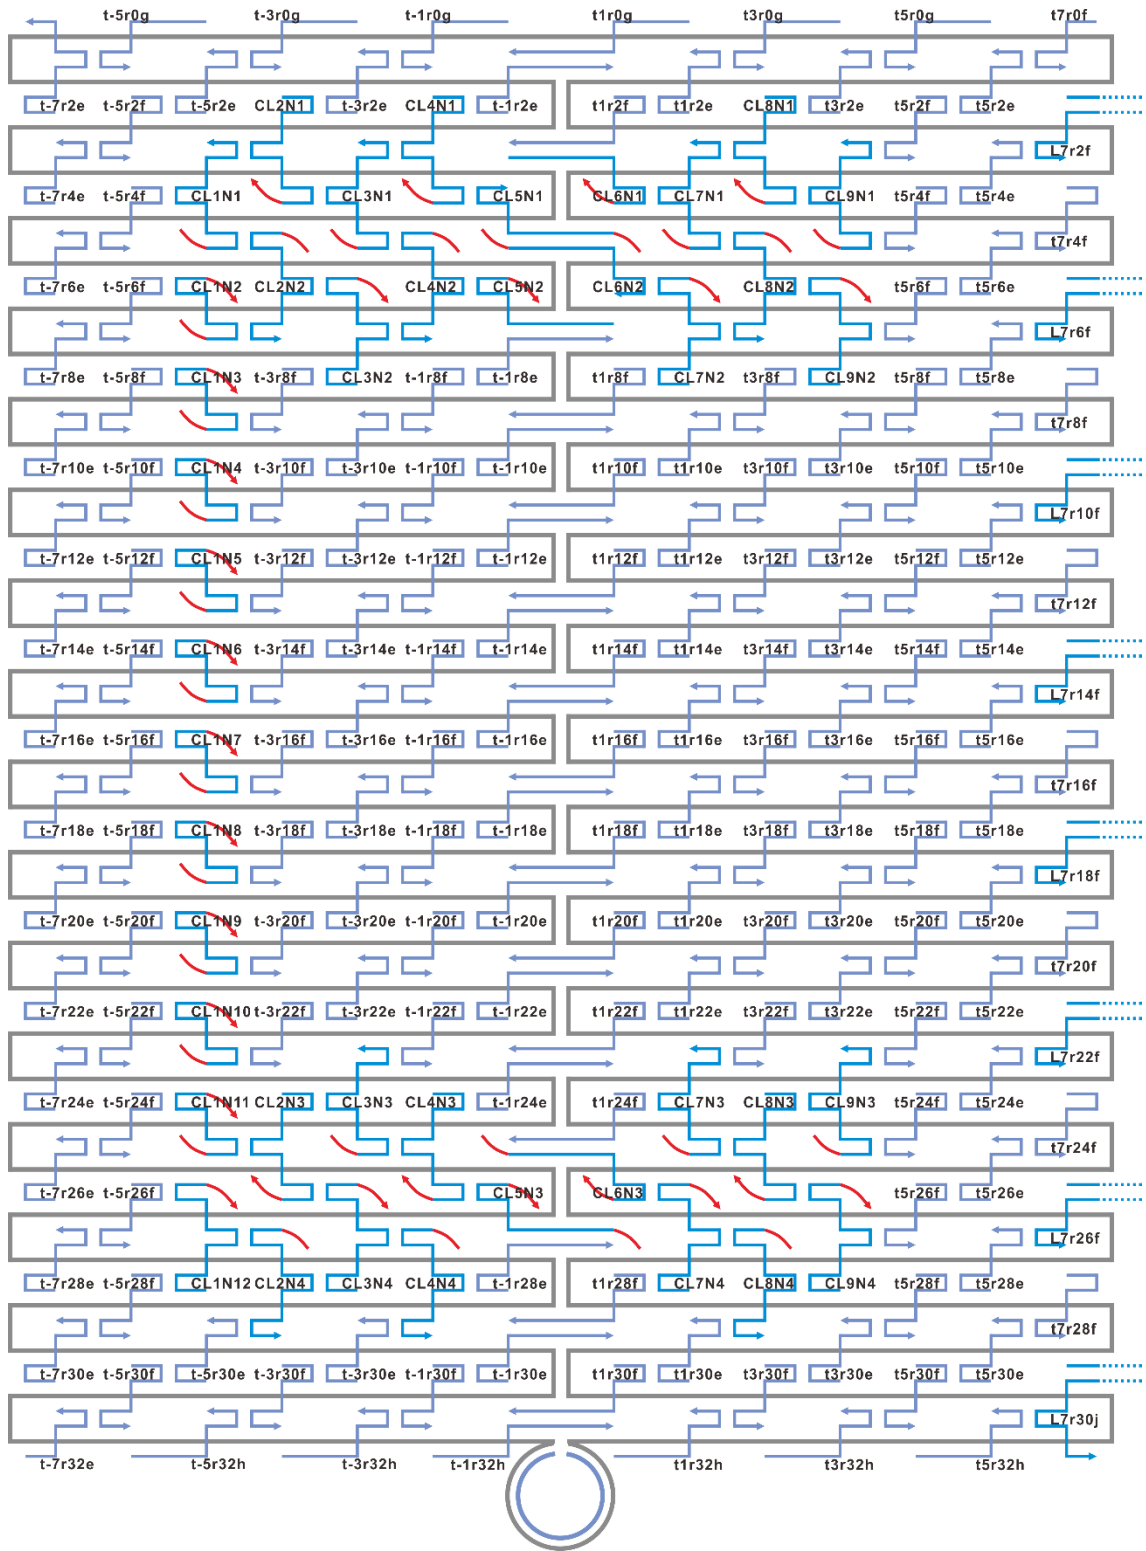

**Supplementary Figure 41.** Schematic of pcDNA on alphabet ‘C’ pattern of tall rectangular DNA origami template.

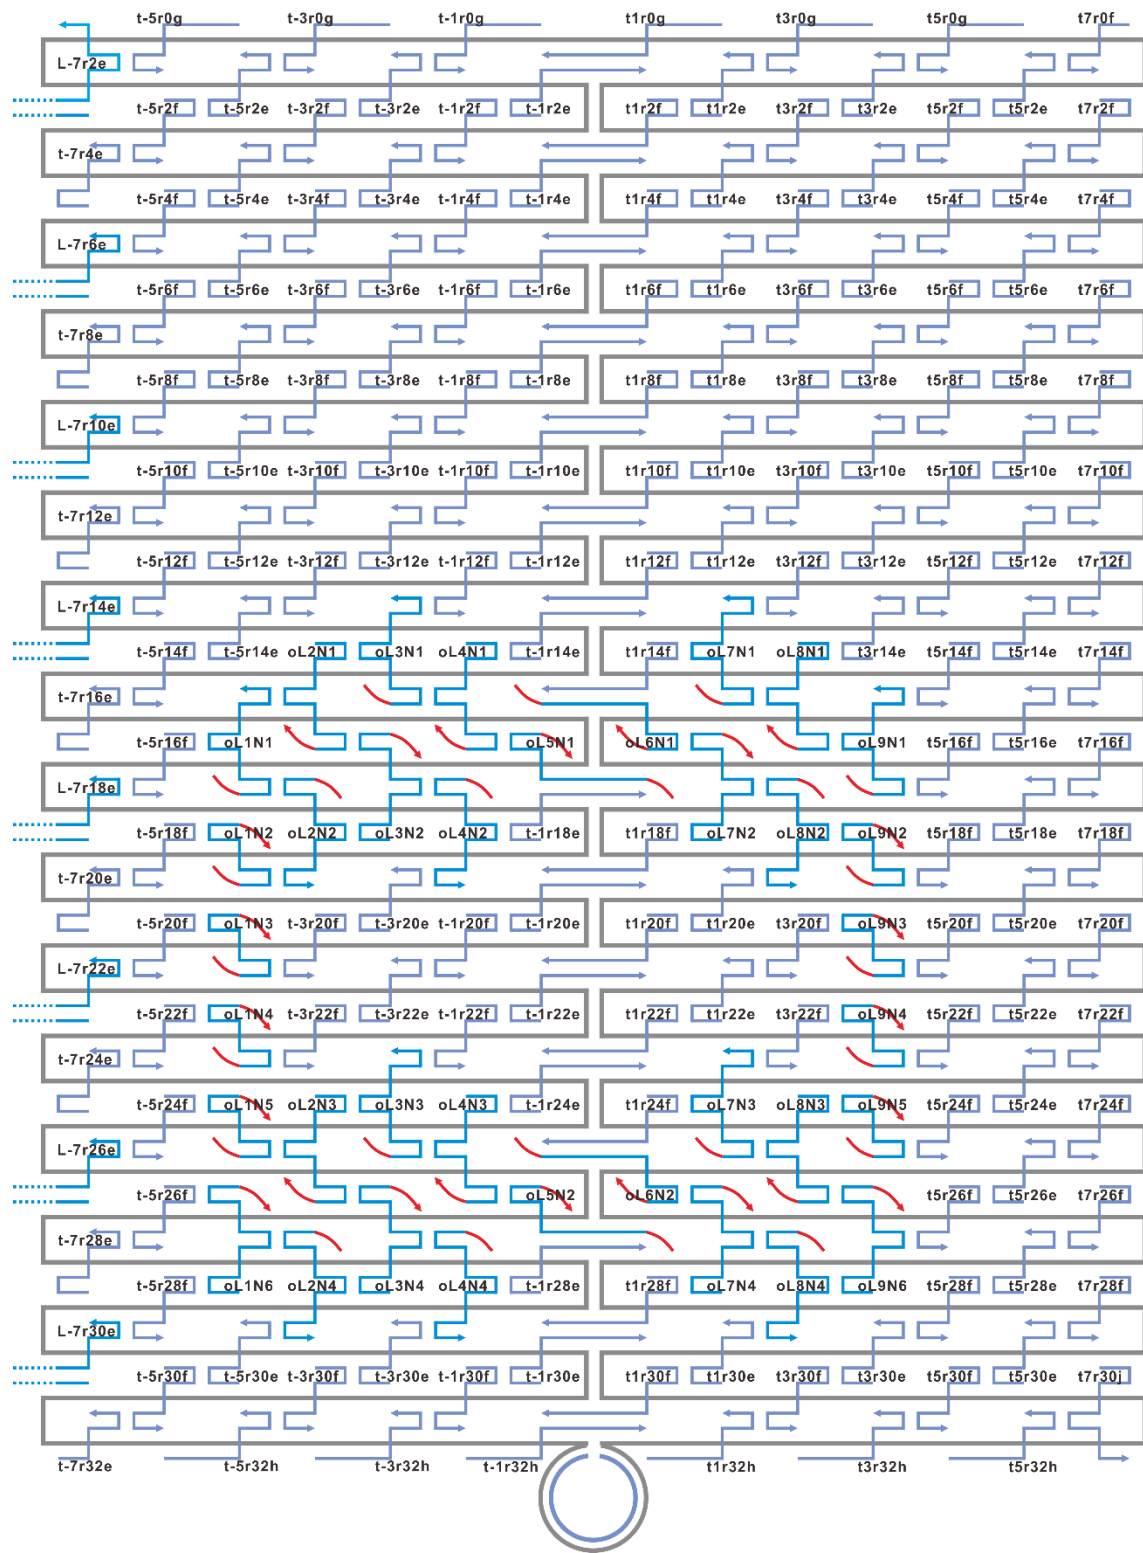

**Supplementary Figure 42.** Schematic of pcDNA on alphabet ‘o’ pattern of tall rectangular DNA origami template.

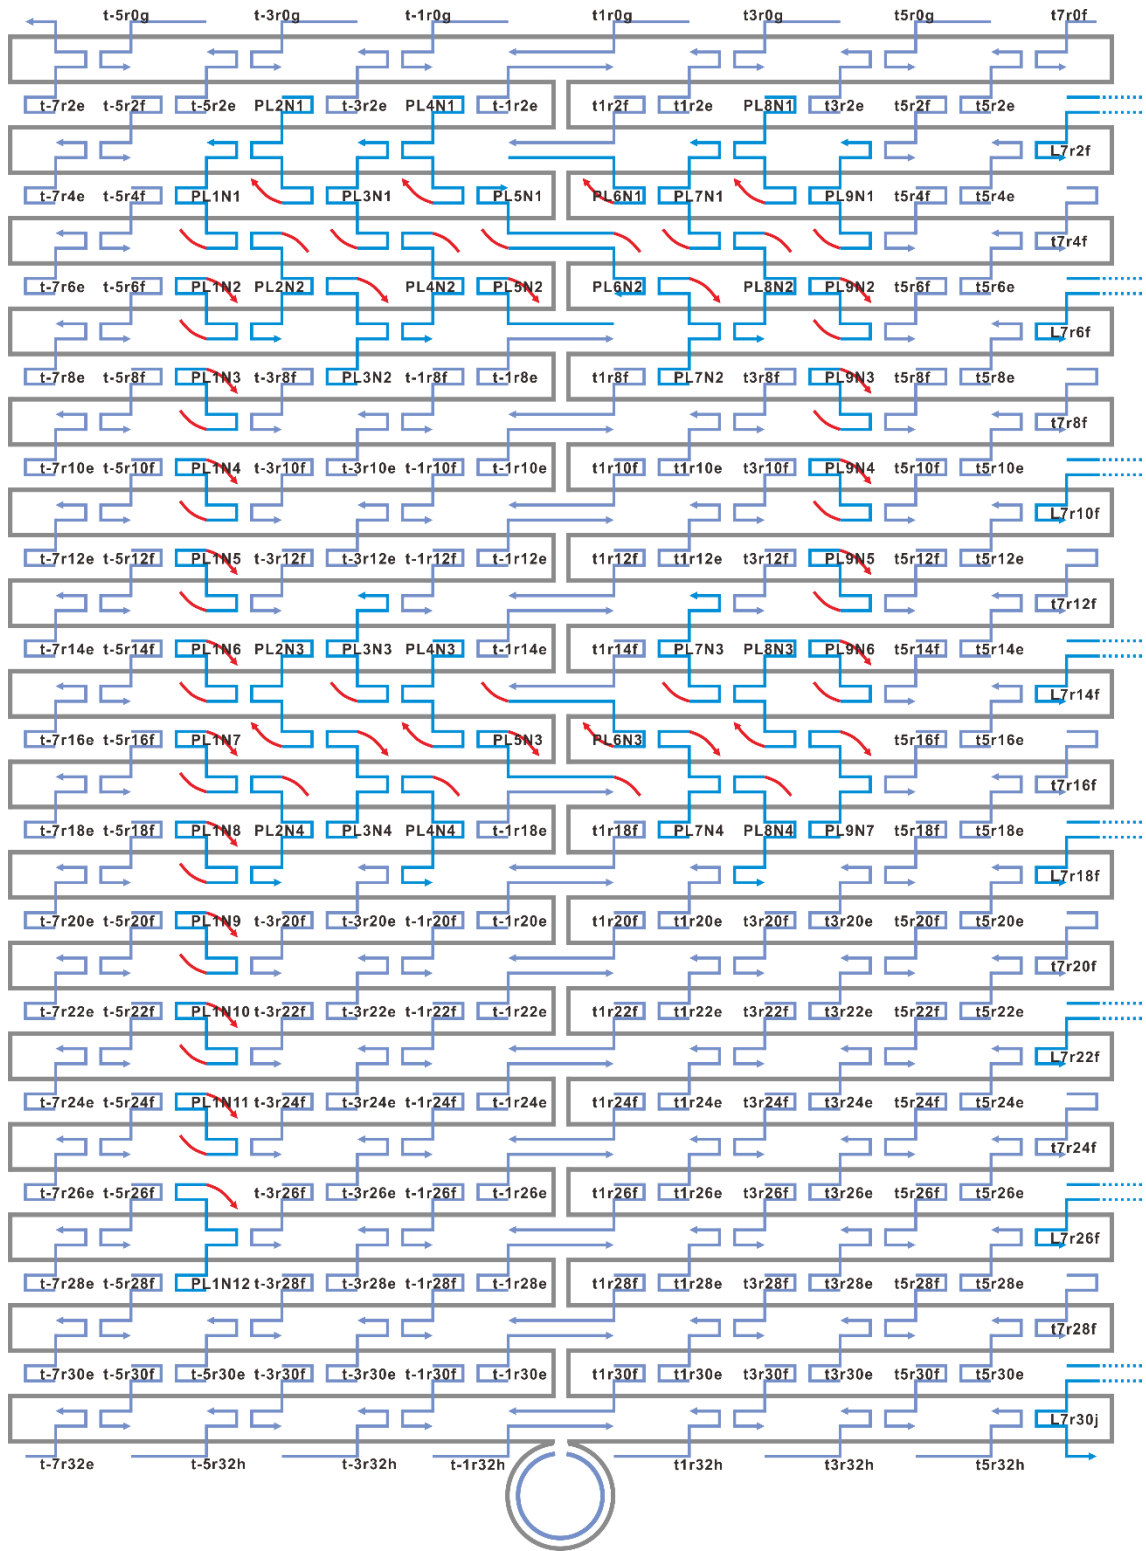

**Supplementary Figure 43.** Schematic of pcDNA on alphabet ‘P’ pattern of tall rectangular DNA origami template.



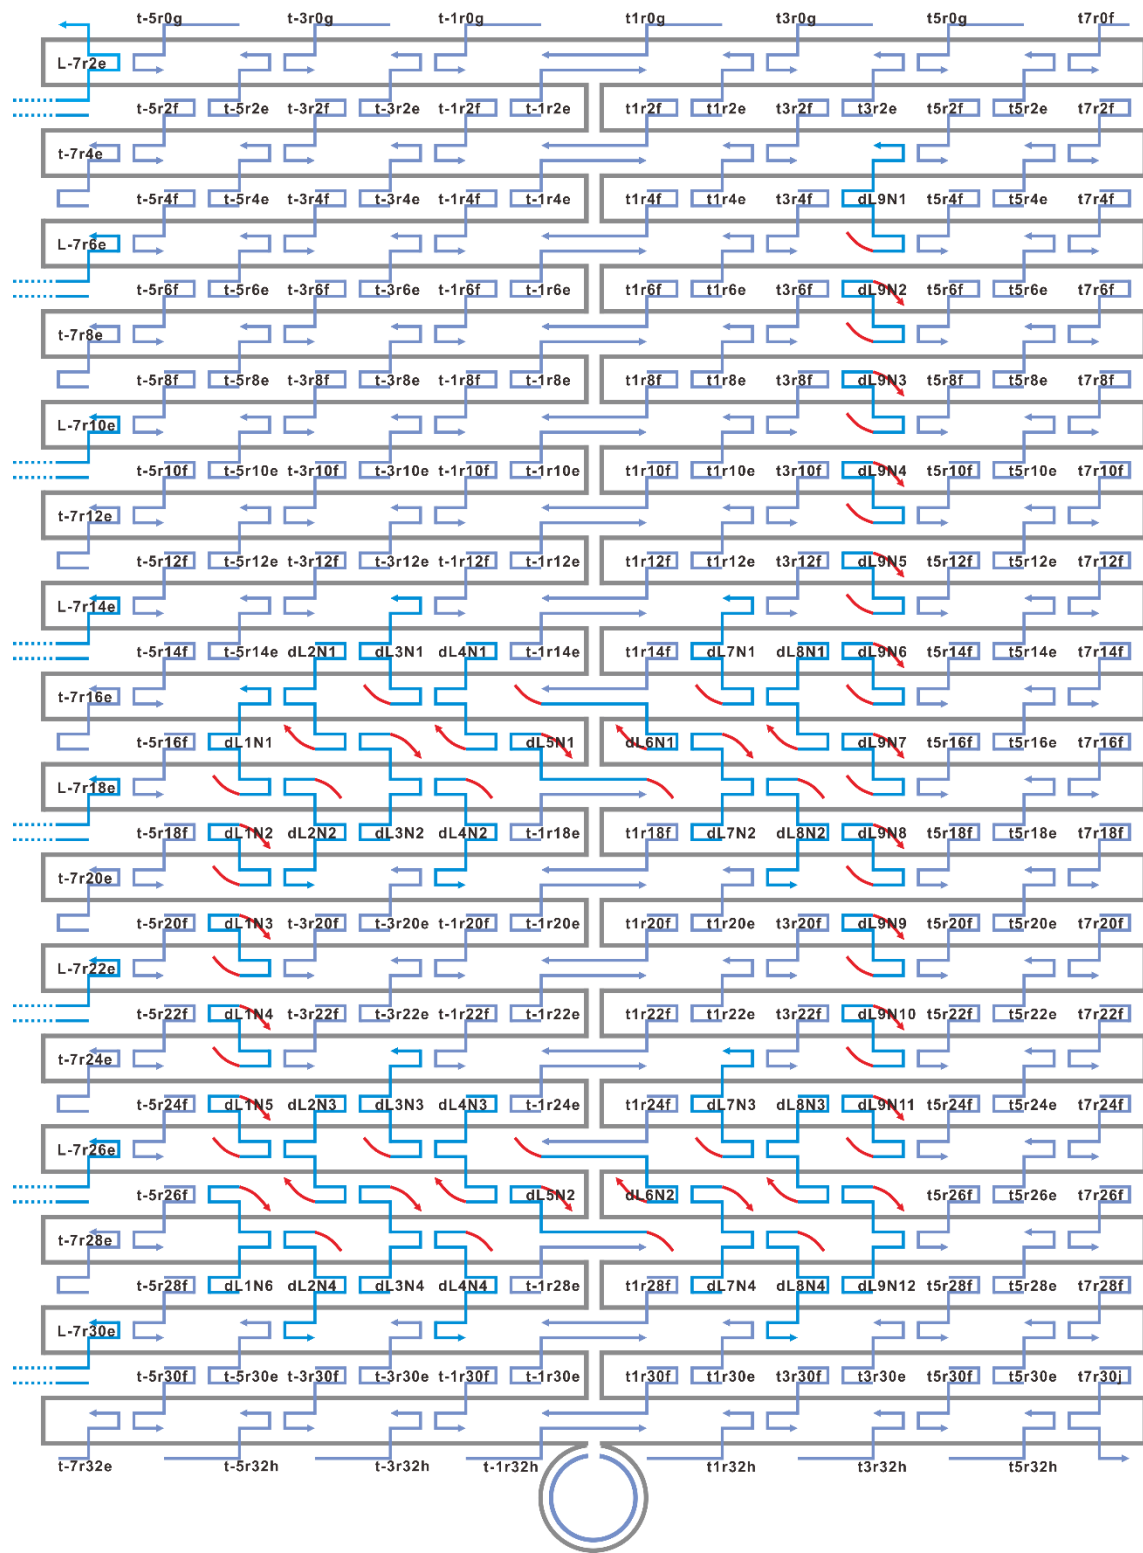

**Supplementary Figure 44.** Schematic of pcDNA on alphabet ‘d’ pattern of tall rectangular DNA origami template.

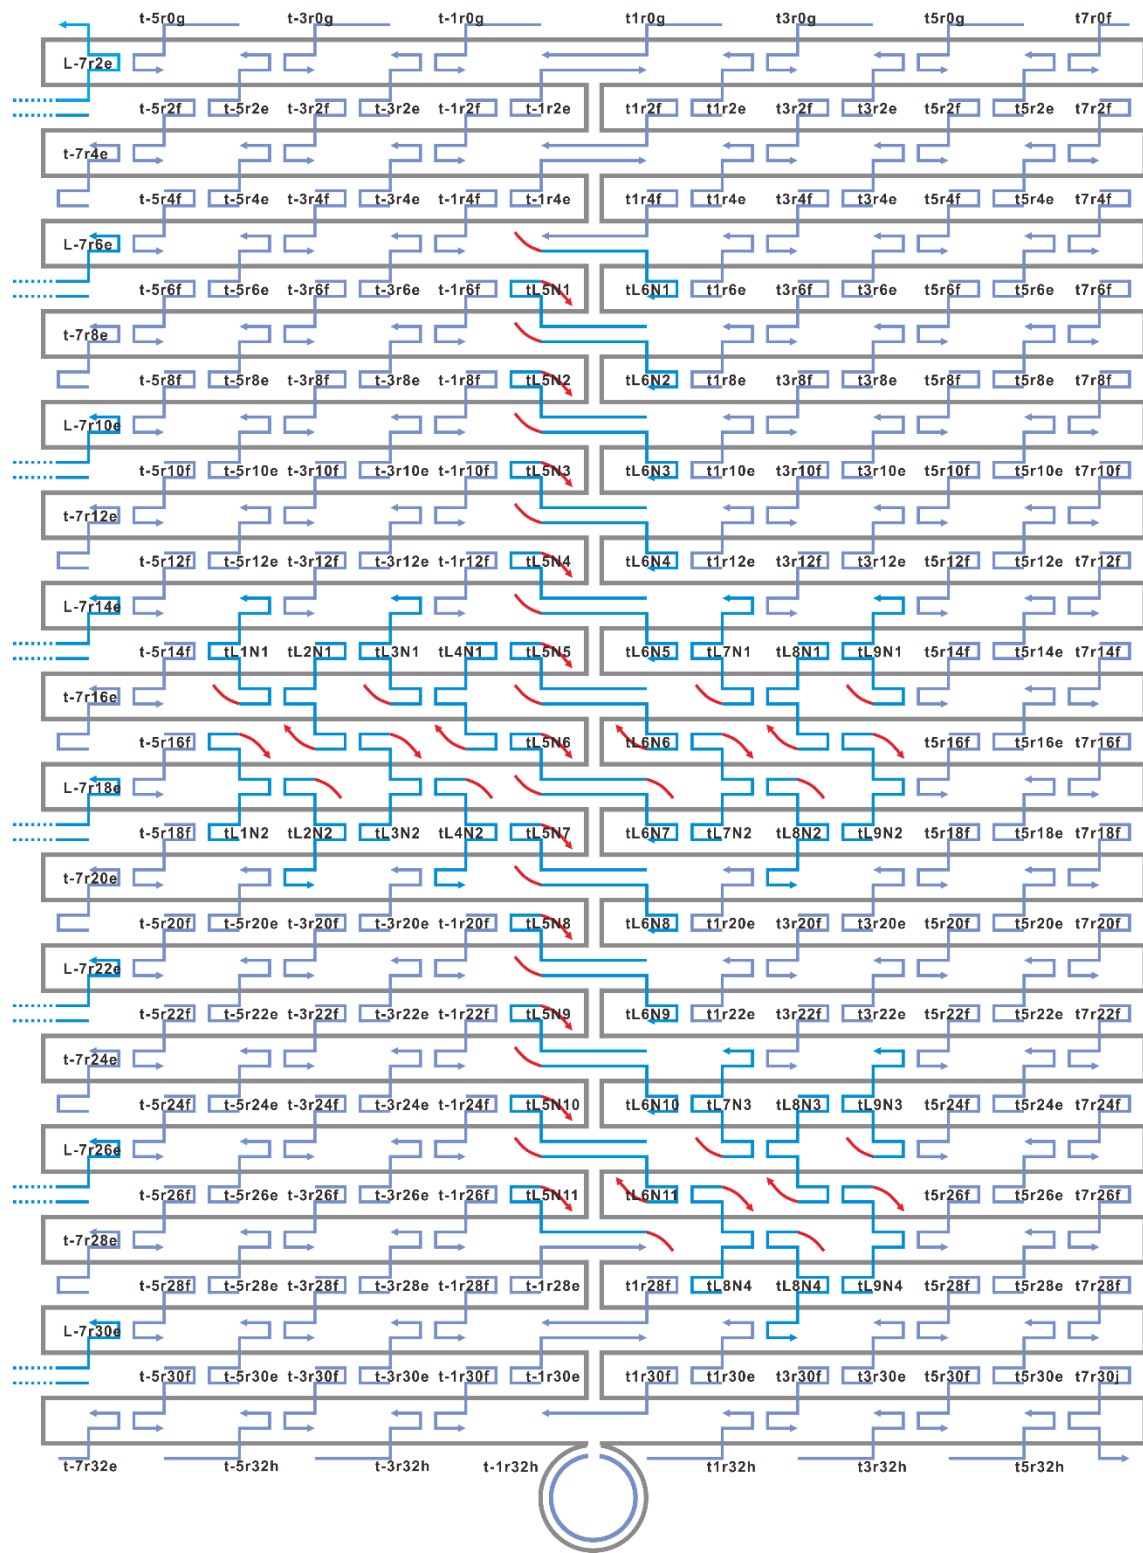

**Supplementary Figure 45.** Schematic of pcDNA on alphabet ‘t’ pattern of tall rectangular DNA origami template.

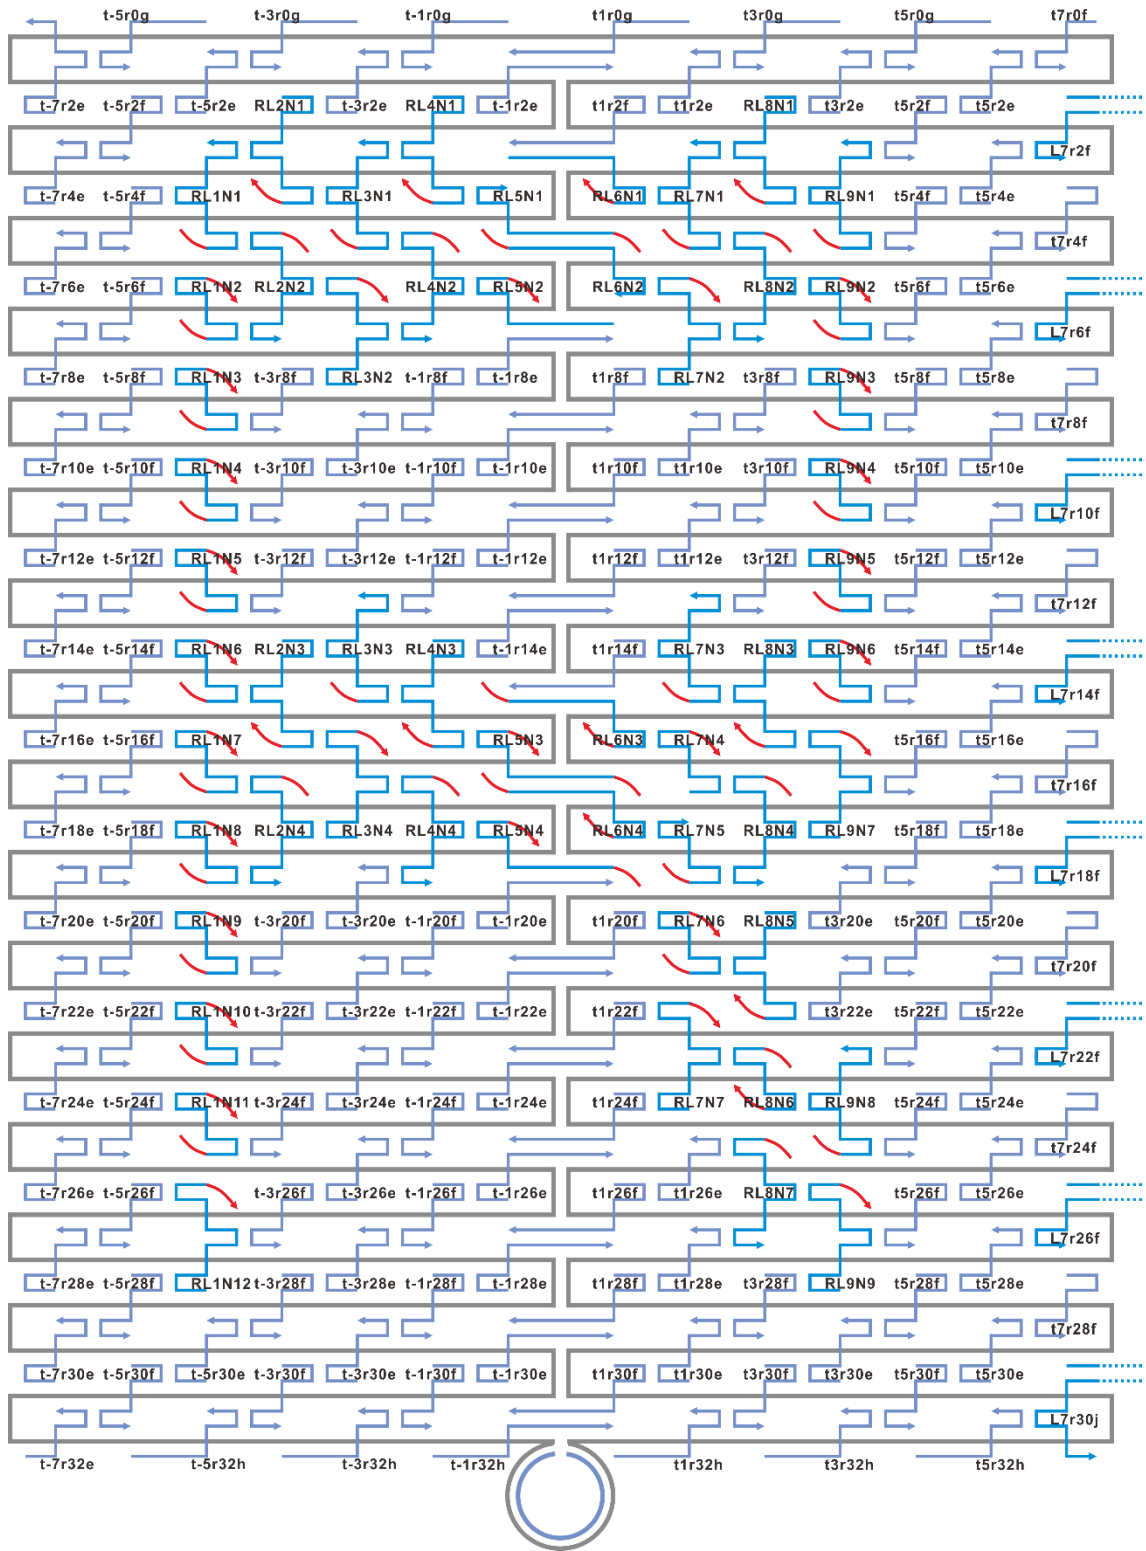

**Supplementary Figure 46.** Schematic of pcDNA on alphabet ‘R’ pattern of tall rectangular DNA origami template.





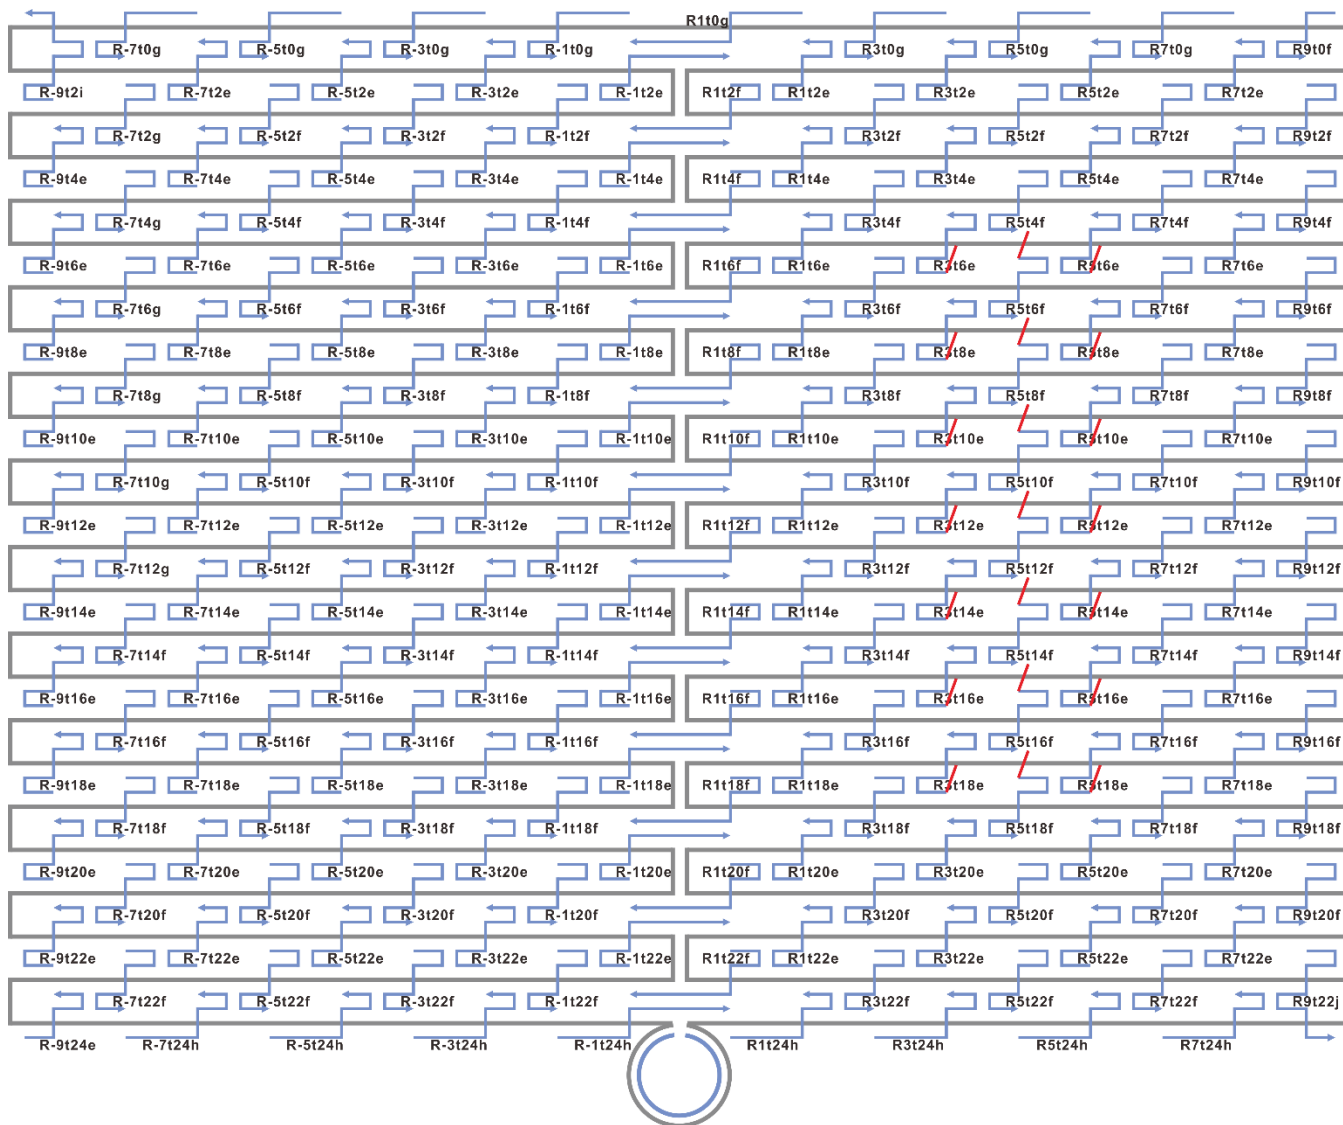

**Supplementary Figure 49.** Schematic of rectangular pattern on rectangular DNA origami template.



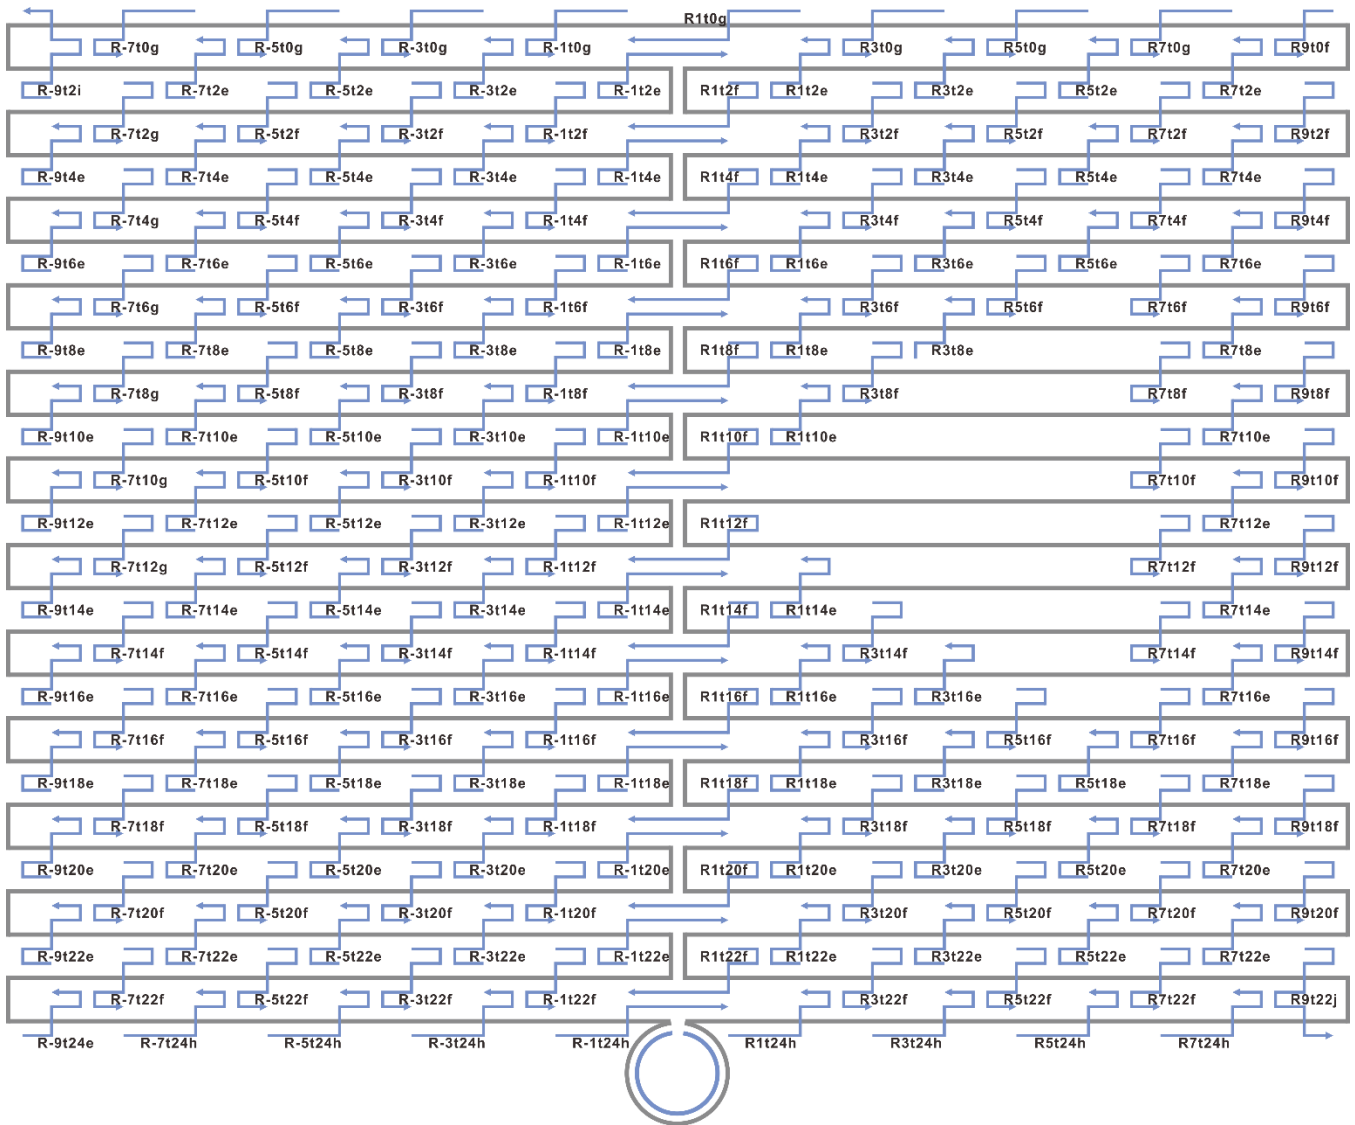

**Supplementary Figure 50.** Schematic of triangular hole on rectangular DNA origami template.

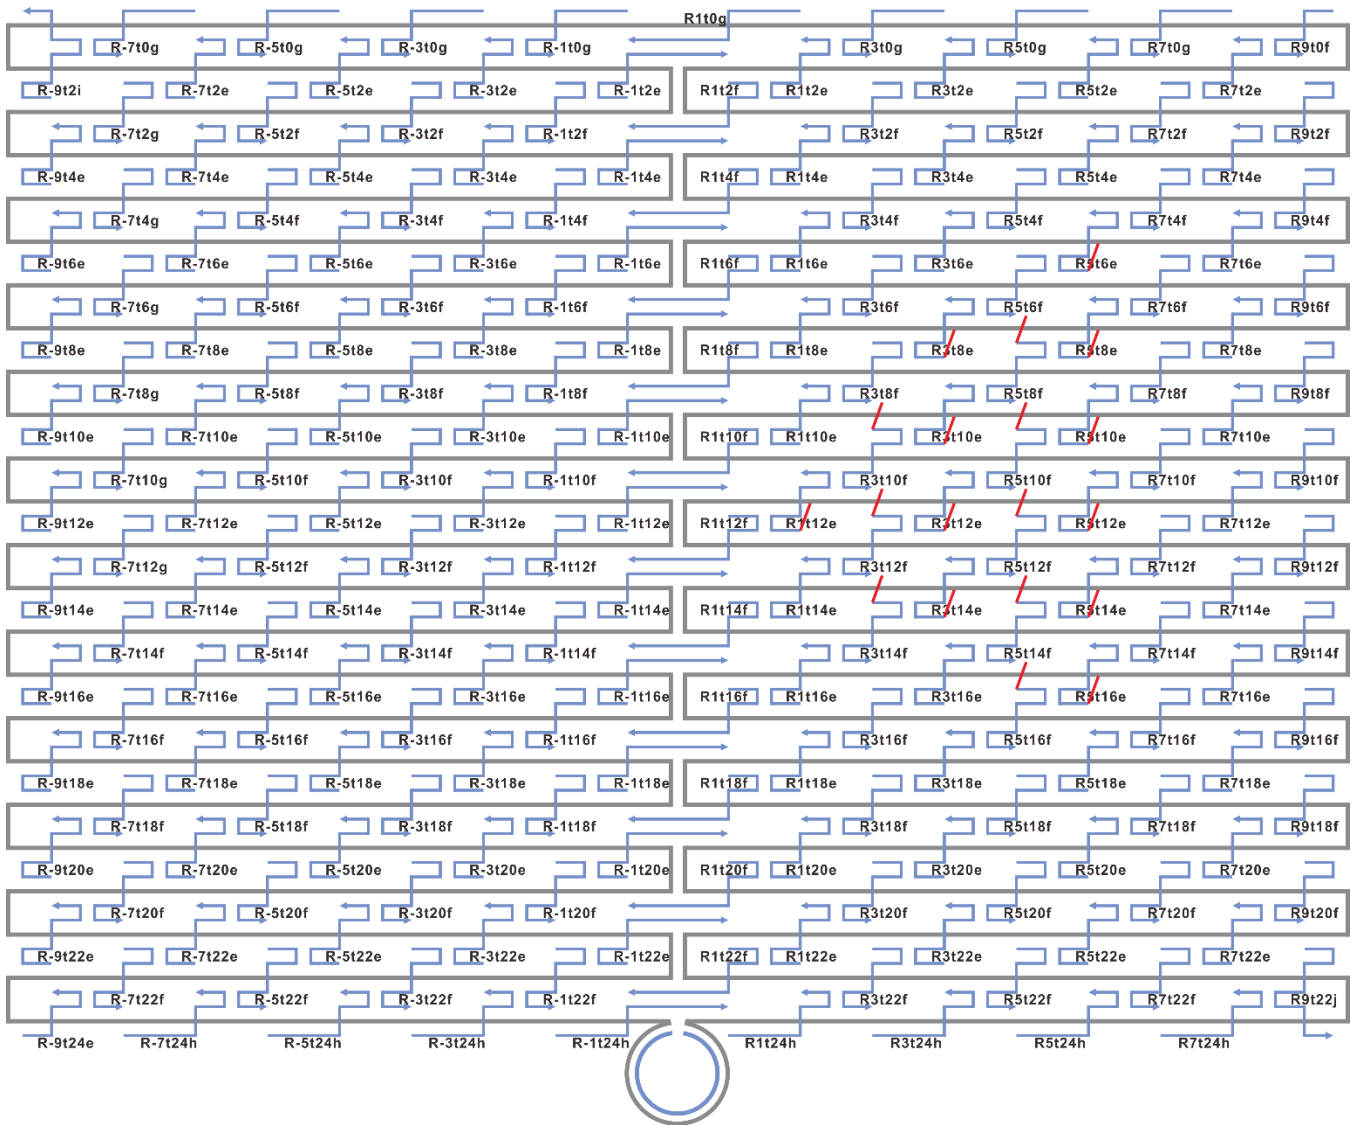

**Supplementary Figure 51.** Schematic of triangular pattern on rectangular DNA origami template.

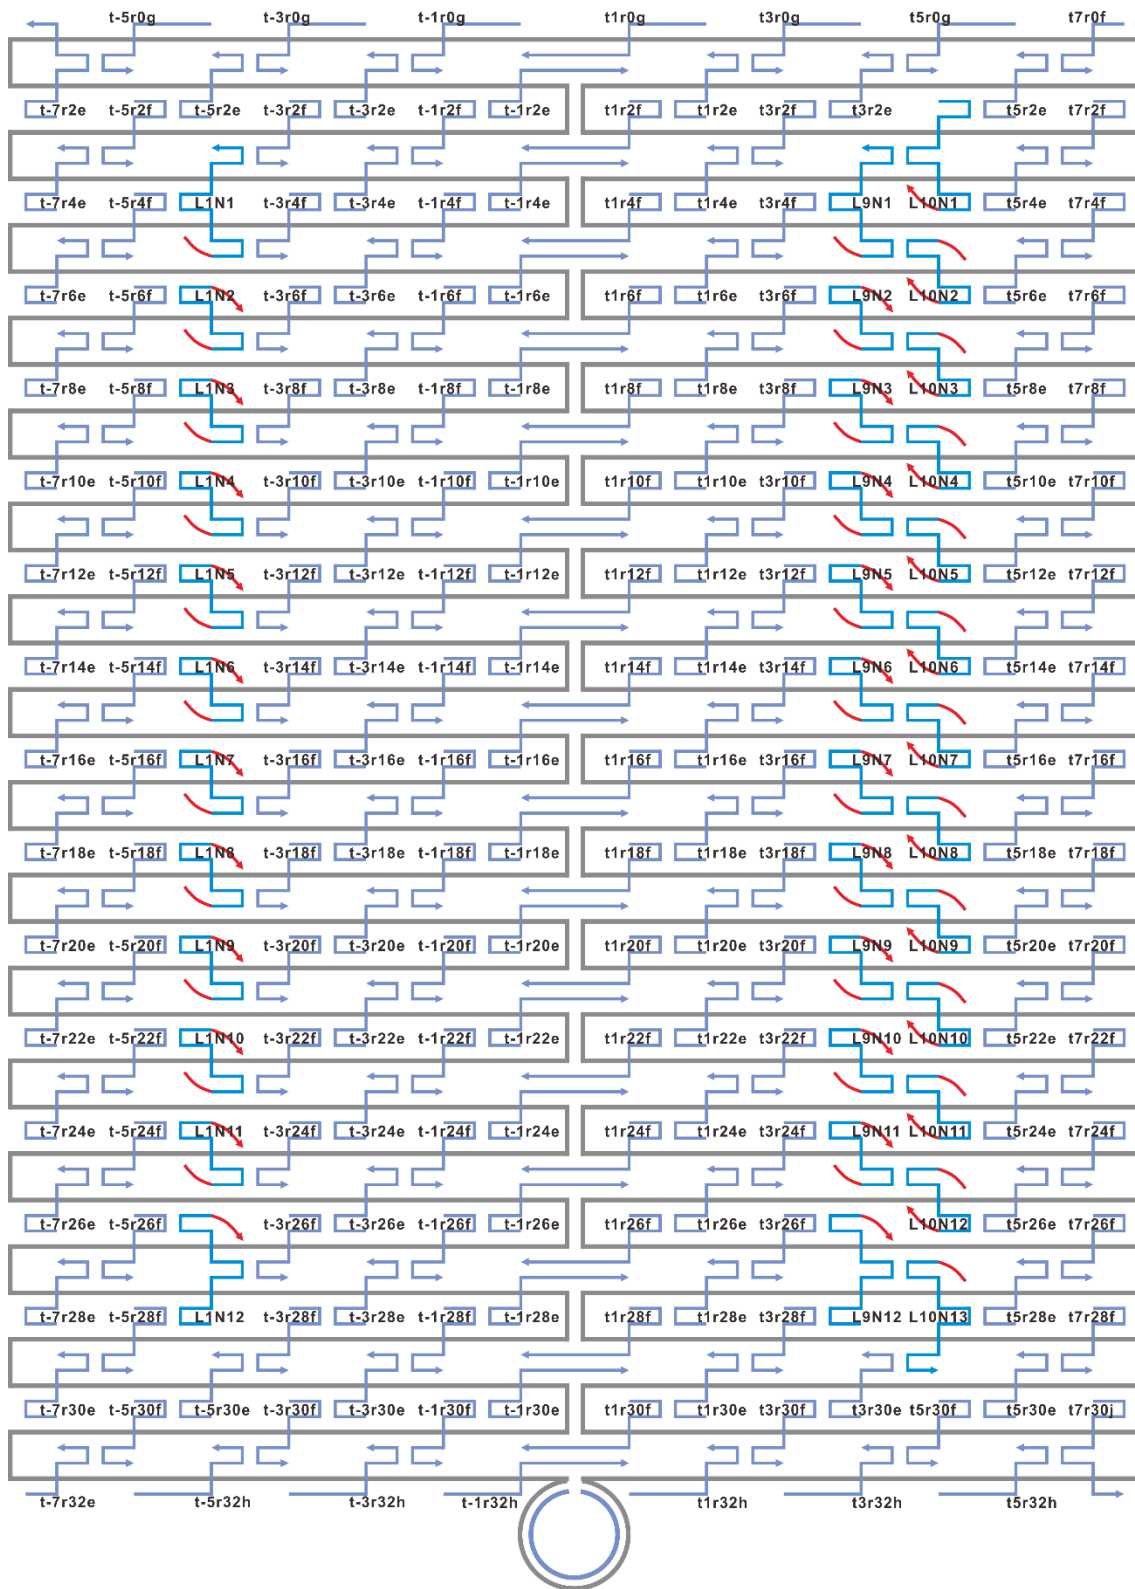

**Supplementary Figure 52.** Schematic of single and double lines pcDNA of tall rectangular DNA origami template.

## Supplementary Notes:

### DNA sequences:

#### For two sides pattern of triangular DNA origami:

The sequence of pcDNA was AGACTAGACTAGACT-5' linked to all the selected staple strands as shown in Figure. S11.

Other sequences can be found in the sequences list for the triangle origami<sup>1</sup>.

#### For digit 8 pattern of rectangular DNA origami:

RL1N1: **CTTGAGAGAGCGAC**GAGTCTGGAAAAGTAGCATGTCAAGATTCTCCGTGGGAACCGTTGGTG  
RL1N2: **ACTTGAGAGAGCGAC**AGCCTCAGTTATGACCCTGTAATATTGCCTGAGACCTGACGACATAG  
RL1N3: **ACTTGAGAGAGCGAC**AGAGCTTATTTAAATATGCAACTAAGCAATAAGACCTGACGACATAG  
RL1N4: **ACTTGAGAGAGCGAC**TACTGCGGAATGCTTTAAACAGTTGATGGCTTGACCTGACGACATAG  
RL1N5: **ACTTGAGAGAGCGAC**CTCATTATTTAATAAAACGAACTAGCGTCCAAAGACCTGACGACATAG  
RL1N6: CGGCTACTTACTTAGCCGGAACGCTGACCAACTTTGAAAAGAACTGGGACCTGACGACATAG  
RL2N1: GCCAGTGCCTGCAGGTCGACTCTGCAAGGCGATTAAGTTTCGCATCGTGACCTGACGACATAG  
RL2N2: **ACTTGAGAGAGCGAC**AAACCGTGCAGTAACAACCCGTCGTCATATGTGACCTGACGACATAG  
RL2N3: **ACTTGAGAGAGCGAC**ACCCCGTAAAGGCTATCAGGTCACTTTTGCGGACCTGACGACATAG  
RL2N4: **ACTTGAGAGAGCGAC**GGAGAAGCAGAATTAGCAAAATTAAGTACGGGACCTGACGACATAG  
RL2N5: **ACTTGAGAGAGCGACT**GTCTGGAAGAGGTCATTTTTGCAGGAAAACGACCTGACGACATAG  
RL2N6: **ACTTGAGAGAGCGAC**GAGAATGAATGTTTAGACTGGATAACGGAACAGACCTGACGACATAG  
RL2N7: **ACTTGAGAGAGCGAC**ACATTATTACCTTATGCGATTTTAGAGGACAGGACCTGACGACATAG  
RL2N8: **ACTTGAGAGAGCGAC**ATGAACGGCGCGACCTGCTCCATGAGAGGCTTGACCTGACGACATAG  
RL2N9: **ACTTGAGAGAGCGACT**GAGGACTAGGGAGTTAAAGGCCGAAAGGAACAATAAGCTTTCCAG  
RL3N1: **ACTTGAGAGAGCGAC**CGATGTGCTAGAGGATCCCCGGTACTTTCCAGTCGGGAAAACGGGCAAC  
RL3N2: **ACTTGAGAGAGCGAC**ATGTGAGCATCTGCCAGTTTGGAGGAAAAGGGGACCTGACGACATAG  
RL3N3: CAACGCAATTTTTGAGAGATCTACTGATAATCAGAAAAGCAACATTAAGACCTGACGACATAG  
RL3N4: **ACTTGAGAGAGCGAC**TCGAAATCTGTACAGA CCAGGCGCTTAATCATTGTGAATTACAGGTAG  
RL3N5: **ACTTGAGAGAGCGAC**AGGCTTGCAAAGACTT TTTTCATGAAAATTGTGGACCTGACGACATAG  
RL3N6: CGTAACGATCTAAAGTTTTGTCGTGAATTGCG AATAATAAGGTCGCTGGACCTGACGACATAG  
RL4N1: ACTGCCCCGCGAGCTCGAATTCGTTATTACGCCAGCTGGCGGACGACGACCTGACGACATAG  
RL4N2: **ACTTGAGAGAGCGAC**ACAGTATCGTAGCCAGCTTTCATCCCCAAAACAGGAAGACCGGAGAG  
RL4N3: TTTCAACTATAGGCTGGCTGACCTTGTATCATCGCCTGATGGAAGTTTGACCTGACGACATAG  
RL4N4: **ACTTGAGAGAGCGAC**CCATTAACATAACCGATATATTCTTTTTTTCACGTTGAAAATAGTTAG  
RL5N1: **ACTTGAGAGAGCGAC**CTCTTCGCAATCATGGTCATAGCTACTCACATTAATTGCGCCCTGAGA  
RL5N2: **ACTTGAGAGAGCGAC**GCCTTCCTGGCCTCAGGAAGATCGGTGCGGGGACCTGACGACATAG  
RL5N3: TATATTTAGCTGATAAATTAATGTTGTATAAGCAAATATCGCGTCTGGACCTGACGACATAG

RL5N4: **ACTTGAGAGAGCGAC**CGGAGATTTTCATCAAGAGTAATCTTAAATTGGGCTTGAGAGAATACCA  
RL5N5: **ACTTGAGAGAGCGAC**CGCCCACGCGGGTAAAATACGTAAAAGTACAA**GACCTGACGACATAG**  
RL5N6: TGTAGCATTCCACAGACAGCCCTCATCTCAA AAAAAAGGACAACCAT**GACCTGACGACATAG**  
RL6N1: GTGAGCTAGTTTCTGTGTGAAATTTGGGAAG GGCGATCGCACTCCAG**GACCTGACGACATAG**  
RL6N2: **ACTTGAGAGAGCGAC**CCAGCTTTGCCATCAA AAATAATTTTAAATTGTAAACGTTGATATTCA  
RL6N3: ACGAGTAGTGACAAGAACCGGATATACCAAGCGCGAAAACATGCCACTA**GACCTGACGACATAG**  
RL6N4: **ACTTGAGAGAGCGAC**CGAAGGCATGCGCCGACAATGACACTCCAAAAGGAGCCTTACAACGCC  
RL7N1: **ACTTGAGAGAGCGAC**CGCAACTGTGTTATCCGCTCACAATGTAAAGCCTGGGGTGGGTTTGGC  
RL7N2: **ACTTGAGAGAGCGAC**ATAGGAACCCGGCACCGCTTCTGGTCAGGCTG**GACCTGACGACATAG**  
RL7N3: AGGTAAAGAAATCACCATCAATATAATATTTTGTTAAAAATTTAAACCA**GACCTGACGACATAG**  
RL7N4: **ACTTGAGAGAGCGAC**AGCGATTATTCATTACCCAAATCACTTGCCCTGACGAGAACGCCAAAA  
RL7N5: **ACTTGAGAGAGCGAC**CCGATAGTCCAACCTAAAACGAAATGACCCCC**GACCTGACGACATAG**  
RL7N6: TGAGTTTCGTCACCAGTACAAACTTAATTGTA TCGGTTTAGCTTGATAG**GACCTGACGACATAG**  
RL8N1: **ACTTGAGAGAGCGACT**TATACAGTAAGCGCCATTGCGCATTGCCGGA**GACCTGACGACATAG**  
RL8N2: **ACTTGAGAGAGCGAC**ATAGCGATTAAATCAGCTCATTTTCGCATTAG**GACCTGACGACATAG**  
RL8N3: **ACTTGAGAGAGCGAC**CTGTTTAGAAGGCCGGAGACAGTCATTCAAAA**GACCTGACGACATAG**  
RL8N4: **ACTTGAGAGAGCGACT**AGAAACCAGCTATATTTTCATTTGGTCAATAG**GACCTGACGACATAG**  
RL8N5: **ACTTGAGAGAGCGAC**CGAGCGTCTATATCGCGTTTAAATTGCCCGAAA**GACCTGACGACATAG**  
RL8N6: **ACTTGAGAGAGCGAC**CGAAGCCCAACACTATCATAACCCGAGGCATAG**GACCTGACGACATAG**  
RL8N7: **ACTTGAGAGAGCGACT**TAAATATTCATTCAAGTGAATAAGGACGTAACA**GACCTGACGACATAG**  
RL8N8: **ACTTGAGAGAGCGAC**GGAACCGCCTAAAACACTCATCTTGAGGCAAA**GACCTGACGACATAG**  
RL8N9: **ACTTGAGAGAGCGAC**GCCCCGTATGTGAATTTCTTAAACATCAGCTTG  
RL9N1: **ACTTGAGAGAGCGAC**ACCAGGCAAACAGTACCTTTTACACAGATGAA**GACCTGACGACATAG**  
RL9N2: **ACTTGAGAGAGCGACA**ATTTTTGAGCTTAGATTAAAGACGTTGAAAAC**GACCTGACGACATAG**  
RL9N3: **ACTTGAGAGAGCGAC**GGGTGAGATATCATATGCGTTATAGAAAAAG**GACCTGACGACATAG**  
RL9N4: **ACTTGAGAGAGCGAC**ACCTGTTAATCAATAATCGGCTGCGAGCATG**GACCTGACGACATAG**  
RL9N5: **ACTTGAGAGAGCGAC**GACTTCAATTCCAGAGCCTAATTTACGCTAAC**GACCTGACGACATAG**  
RL9N6: **ACTTGAGAGAGCGAC**GTAAGAGCTTTTTAAGAAAAGTAATATCTTAC**GACCTGACGACATAG**  
RL9N7: **ACTTGAGAGAGCGACA**AGCTGCTGACGAAATTTATTCATAGGGAAGG**GACCTGACGACATAG**  
RL9N8: **ACTTGAGAGAGCGACA**GAATACACTCCCTCAGAGCCGCCCCACCACC**GACCTGACGACATAG**  
RL9N9: CTTTCGAGAAACAGTTAATGCCCGTAAACAGT**GACCTGACGACATAG**  
RL10N1: GGATTTAGCGTATTAATCCTTTGTTTTTCAGGTTAACGTTCCGGGAGAG**GACCTGACGACATAG**  
RL10N2: **ACTTGAGAGAGCGACA**ACAATAATTTCCCTTAGAATCCCTGAGAAGAGTCAATAGGAATCAT  
RL10N3: ATTGAGGGTAAAGGTGAATTATCAATCACCGGAACCAGAGACCCTCAG**GACCTGACGACATAG**  
RL10N4: **ACTTGAGAGAGCGACA**ACCGCCAGGGGTCAGTGCCTTGACTGCCTATTTCCGGAACAGGGATAG  
RL11N1: **ACTTGAGAGAGCGACT**GCGTAGACCCGAACGTTATTAATGCCGTCAATAGATAATCAGAGGTG

RL11N2: **ACTTGAGAGAGCGACT**TAAATTAACGGATTTCGCTGATTGAAAGAAAT**GACCTGACGACATAG**  
RL11N3: ACGCTCAAAATAAGAATAAACACCGTGAATTTATCAAAATCGTCGCTA**GACCTGACGACATAG**  
RL11N4: **ACTTGAGAGAGCGACT**AATCAAACCGTCACCGACTTGAGAGACAAAAGGGCGACAAGTTACCA  
RL11N5: **ACTTGAGAGAGCGAC**GTTTTAAACCCCTCAGAGCCACCACTCTTTTCAG**GACCTGACGACATAG**  
RL11N6: CTCAGAGCCACCACCTCATTTTCTATTATTCTGAAACAGGTAATAA**GACCTGACGACATAG**  
RL12N1: AGATTAGATTTAAAAGTTTGAGTACACGTAACAGAAATCTTTGAAT**GACCTGACGACATAG**  
RL12N2: **ACTTGAGAGAGCGAC**ACCAAGTTCCTTGCTTCTGTAAATCATAGGCTGAGAGACGATAAATA  
RL12N3: AGCGCCAACCATTTGGGAATTAGATTATTAGCGTTTGCCACCTCAGAG**GACCTGACGACATAG**  
RL12N4: **ACTTGAGAGAGCGAC**CCGCCACCGATACAGGAGTGTACTTGAAAGTATTAAGAGGCCGCCACC  
RL13N1: **ACTTGAGAGAGCGAC**ATTATTTGACATTATCATTTTGCGTCTTTAGGAGCACTAAGCAACAGT  
RL13N2: **ACTTGAGAGAGCGAC**GTGAATAAACAAAATCGCGCAGAGATATCAA**GACCTGACGACATAG**  
RL13N3: CATATTTAGAAATACCGACCGTGTACCTTTTTAACCTCCATATGTGA**GACCTGACGACATAG**  
RL13N4: **ACTTGAGAGAGCGACT**AGCCCCGCCAGCAAATCACCAAATAGAAAATTCATATATAACGGA  
RL13N5: **ACTTGAGAGAGCGAC**CTTTTGATAGAACCACCACCAGAGTTCGGTCATCTAAAGACGTTGGG  
RL13N6: CCCTCAGAACCGCCACCCTCAGAACTGAGACTCCTCAAGAATACATGG**GACCTGACGACATAG**  
RL14N1: CTAAAATAGAACAAAGAAACCACCAGGGTTAGAACCTACCGGAATTA**GACCTGACGACATAG**  
RL14N2: **ACTTGAGAGAGCGACT**TCATTTCCAGTACATAAATCAATGGCTTAGGTTGGGTTACTAAATTT  
RL14N3: TCACAATCGTAGCACCATTACCATCGTTTTTCATCGGCATTCCGCCGCC**GACCTGACGACATAG**  
RL14N4: **ACTTGAGAGAGCGAC**AGCATTGACGTTCCAGTAAGCGTCGAAGGATTAGGATTAGTACCGCCA  
RL15N1: **ACTTGAGAGAGCGAC**ATAATGGAAGAAGGAGCGGAATTATTGAAAGGAATTGAGGTGAAAAAT  
RL15N2: **ACTTGAGAGAGCGAC**AATGGAAAAATTACCTGAGCAAAAATTTCTGA**GACCTGACGACATAG**  
RL15N3: **ACTTGAGAGAGCGAC**CTTCTGACTATAACTATATGTAAACCTTTTTTT**GACCTGACGACATAG**  
RL15N4: **ACTTGAGAGAGCGAC**AACAACATATTTAGGCAGAGGCATAATTTTCAT**GACCTGACGACATAG**  
RL15N5: **ACTTGAGAGAGCGAC**CCCTCCCGACGTAGGAATCATTACCCGACAATA**GACCTGACGACATAG**  
RL15N6: **ACTTGAGAGAGCGAC**GTAATTGAATAGCAGCCTTTACAGTTAGCGAA**GACCTGACGACATAG**  
RL15N7: **ACTTGAGAGAGCGAC**GAAATAAGTAAGACTCCTTATTACGGTCAGAGG**GACCTGACGACATAG**  
RL15N8: **ACTTGAGAGAGCGAC**CTGTAGCGTAGCAAGGCCGAAACACACCACG**GACCTGACGACATAG**  
RL15N9: **ACTTGAGAGAGCGAC**GAAATTTACCAGGAGGTTGAGGCAGGCGTCAG**GACCTGACGACATAG**  
RL15N10: TATCACCGTACTCAGGAGGTTTAGCGGGTTTTGCTCAGTCAGTCTCT**GACCTGACGACATAG**  
RL16N1: TGGATTATGAAGATGATGAAACAAAATTTTCATTTGAATTATGCTGATG**GACCTGACGACATAG**  
RL16N2: **ACTTGAGAGAGCGAC**CAAATCCACAAATATATTTTAGTTTTTCGAGC**GACCTGACGACATAG**  
RL16N3: **ACTTGAGAGAGCGAC**CCAGTAATAAATTTCTGTCCAGACGAGCGCCAA**GACCTGACGACATAG**  
RL16N4: **ACTTGAGAGAGCGACT**AGCAAGCAAGAACGCGAGGCGTTAGAGAATA**GACCTGACGACATAG**  
RL16N5: **ACTTGAGAGAGCGAC**ACATAAAAGAACACCCTGAACAAACAGTATGT**GACCTGACGACATAG**  
RL16N6: **ACTTGAGAGAGCGACT**AGCAAATAAAAGAAACGCAAAGGTCACCA**GACCTGACGACATAG**  
RL16N7: **ACTTGAGAGAGCGACT**GAAACCAATCAAGTTTGCCTTTAGTCAGACGATTGGCCTGCCAGAAT



Other sequences can be found in the sequences list for the rectangle origami<sup>2</sup>.

**For alphabet ‘A’, ‘g’, ‘P’, ‘d’, ‘t’, ‘C’, ‘o’, ‘R’, ‘h’, ‘N’ and ‘i’ pattern of tall rectangular DNA origami:**

gL1N1, PL1N1, CL1N1, RL1N1, hL1N1, NL1N1:

**TCGACGACTACTGACTGAGGACTAGGGAGTTAAAGGCCGCTCCAAAAGGAGCCTTAGCGGAGT**

gL1N2, PL1N2, CL1N2, RL1N2, hL1N2, NL1N2:

**TCGACGACTACTGACCCGGAACGTACCAAGCGCGAAACAAGAGGCTTCTTGGGTCGTAGACA**

gL1N3, PL1N3, CL1N3, RL1N3, hL1N3, NL1N3:

**TCGACGACTACTGACGCTTGAGATTCATTACCCAAATCATTACTTAGCTTGGGTCGTAGACA**

gL1N4, PL1N4, CL1N4, RL1N4, hL1N4, NL1N4:

**TCGACGACTACTGACGTAAGAGCACAGGTAGAAAGATTCTAAATTGGCTTGGGTCGTAGACA**

gL1N5, PL1N5, CL1N5, RL1N5, hL1N5, NL1N5:

**TCGACGACTACTGACACCCTGACAATCGTCATAAATATTGAGGCATACCTTGGGTCGTAGACA**

gL1N6, PL1N6, CL1N6, RL1N6, hL1N6, NL1N6:

**TCGACGACTACTGACCAACATGTTTAGAGAGTACCTTTAAGGTCTTTCTTGGGTCGTAGACA**

tL1N1: **TCGACGACTACTGACCAACATGTTTAGAGAGTACCTTTAAGGTCTTTACCCTGACAATCGTCA**

gL1N7, tL1N2: TATATTTTCATACAGGCAAGGCAAAGCTATATTTTCATTTCTGTAGCT**CTTGGGTCGTAGACA**

tL1N2, oL1N1: **TCGACGACTACTGACCAAGGCAAAGCTATATTTTCATTTCTGTAGCTCAACATGTTTAGAGAG**

PL1N7, CL1N7, RL1N7, hL1N7, NL1N7:

**TCGACGACTACTGACCAAGGCAAAGCTATATTTTCATTTCTGTAGCTCTTGGGTCGTAGACA**

PL1N8, dL1N2, CL1N8, oL1N2, RL1N8, hL1N8, NL1N8:

**TCGACGACTACTGACATCAATATAACCCTCATATATTTTCATACAGGCTTGGGTCGTAGACA**

PL1N9, dL1N3, CL1N9, oL1N3, RL1N9, hL1N9, NL1N9:

**TCGACGACTACTGACTAAACGTTAAACTAGCATGTCAAAAATCACCCCTTGGGTCGTAGACA**

PL1N10, dL1N4, CL1N10, oL1N4, RL1N10, hL1N10, NL1N10:

**TCGACGACTACTGACAACCGTGCGAGTAACAACCCGTCGTTAAATTGCTTGGGTCGTAGACA**

PL1N11, dL1N5, CL1N11, oL1N5, RL1N11, hL1N11, NL1N11:

**TCGACGACTACTGACCCAGGGTTTTGGGAAGGGCGATCGCGCATCGTCTTGGGTCGTAGACA**

AL1N1, gL1N8: **TCGACGACTACTGACCCAGGGTTTTGGGAAGGGCGATCGCGCATCGTAAACCGTGCGAGTAACA**

AL1N12, gL1N9, PL1N12, dL1N6, CL1N12, oL1N6, RL1N12, hL1N12, NL1N12:

AGCTGATTACTCACATTAATTGCGTGTTATCCGCTCACAAGGGTAACG**CTTGGGTCGTAGACA**

gL2N1, PL1N1, CL2N1, RL2N1:

TGTAGCATAACTTTCAACAGTTTCTAATTGTATCGGTTTAGGTCGCTG**CTTGGGTCGTAGACA**

gL2N2, PL2N2, CL2N2, RL2N2:

**TCGACGACTACTGACAGGCTTGCAAAGACTTTTTTCATGATGACCCCCAGCGATTAAGGCGCAG**

NL2N1: TCGGTTTAGGTCGCTGAGGCTTGCAAAGACTTTTTTCATGATGACCCCC**CTTGGGTCGTAGACA**

NL2N2: **TCGACGACTACTGAC**AGCGATTAAGGCGCAGACGGTCAATGACAAGACTTGGGTCGTAGACA

NL2N3: **TCGACGACTACTGAC**ACCGGATATGGTTTAATTTCAACTACGGAACAACATTATTAACACTAT

gL2N3, PL2N3, dL2N1, tL2N1, oL2N1, RL2N3, hL2N1:

TCAGAAGCCTCCAACAGGTCAGGATTTAAATATGCAACTAGGTCAATA**CTTGGGTCGTAGACA**

gL2N4, PL2N4, dL2N2, tL2N2, oL2N2, RL2N4, hL2N2:

**TCGACGACTACTGAC**ACCTGTTTAGAATTAGCAAAAATTAGGATAAAAATTTTAGGATATTCA

gL2N5, dL2N3, CL2N5, oL2N3:

GTTTGAGGTCAGGCTGCGCAACTG TTCCAGTCACGACGTGTTTCCTG**CTTGGGTCGTAGACA**

gL2N6, dL2N4, CL2N6, oL2N4:

**TCGACGACTACTGACT**TGTGAAATTTGCGCTCACTGCCCCGCTTTTCACCAGTGAGATGGTGGTT

gL3N1, PL3N1, CL3N1, RL3N1:

**TCGACGACTACTGAC**CCATTAAACATAACCGATATATTCTCAGCTTGCTTTTCGAGTGGGATTT

gL3N2, PL3N2, CL3N2, RL3N2:

AGTAATCTTCATAAGGGAACCGAACTAAAACACTCATCTT GGAAGTTT**CTTGGGTCGTAGACA**

NL3N1: **TCGACGACTACTGACT**TGTGAATTCATCAAGAGTAATCTTCATAAGGGAACCGAACTAAAACA

NL3N2: **TCGACGACTACTGAC**CCAGACGACTTAATAAAAACGAACTATTAATCAT**CTTGGGTCGTAGACA**

NL3N3: GAAGCAAAAAGCGGATTGCATCAATGTTTAGACTGGATATCGTTTAC**CTTGGGTCGTAGACA**

gL3N3, PL3N3, dL3N1, tL3N1, oL3N1, RL3N3, hL3N1:

**TCGACGACTACTGACT**TGTCTGGACCAGACCGGAAGCAAAAAAGCGGATTGCATCAATGTTTAG

gL3N4, PL3N4, dL3N2, tL3N2, oL3N2, RL3N4, hL3N2:

CAACGCAAAGCAATAAAGCCTCAGGATACATTTGCAATAAAGTACGG**CTTGGGTCGTAGACA**

gL3N5, dL3N3, CL3N3, oL3N3:

**TCGACGACTACTGAC**GACGGCCAAAGCGCCATTCGCCATGGACGACGACAGTATCGTAGCCAG

gL3N6, dL3N4, CL3N4, oL3N4:

TGGTTTTTCTTTCCAGTCGGGAAAATCATGGTCATAGCTTGTA AAAAC**CTTGGGTCGTAGACA**

gL4N1, PL4N1, CL4N1, RL4N1:

CGTAACGAAAATGAATTTTCTGTAGTGAATTTCTTAAACAACAACCAT**CTTGGGTCGTAGACA**

gL4N2, PL4N2, CL4N2, RL4N2:

**TCGACGACTACTGAC**CGCCACGCGGGTAAAATACGTAAGAGGCAAAAAGAATACACTGACCAA

NL4N1: CGATTTTAGGAAGAAAAATCTACGGATAAAAACCAAATAAGGGGGT**CTTGGGTCGTAGACA**

NL4N2: **TCGACGACTACTGAC**ATAGTAAAAAAGATTAAGAGGAACGAGCTTC**CTTGGGTCGTAGACA**

NL4N3: **TCGACGACTACTGAC**AAAGCGAAAGTTTCATTCCATATATTTAGTTTGACCATTAAGCATAAA

gL4N3, PL4N3, dL4N1, tL4N1, oL4N1, RL4N3, hL4N1:

AAGAGGAACGAGCTTCAAAGCGAAAGTTTCATTCCATATATTTAGTTT**CTTGGGTCGTAGACA**

gL4N4, PL4N4, dL4N2, tL4N2, oL4N2, RL4N4, hL4N2:

**TCGACGACTACTGAC**GACCATTAAGCATAAAGCTAAATCCTTTTGCGGGAGAAGCCCGGAGAG

gL4N5, dL4N3, CL4N3, oL4N3:

GAAGATCGTGCCGAAACCAGGCAGTGCCAAGCTTGCATGCCGAGCTC**CTTGGGTCGTAGACA**

gL4N6, dL4N4, CL4N4, oL4N4:

**TCGACGACTACTGAC**GAATTGCTCTGTCGTGCCAGCTGCGGTTTTCGTATTGGGAATCAAAA

gL5N1, PL5N1, CL5N1, RL5N1: **TCGACGACTACTGAC**GGAACCGCTGCGCCGACAATGACAGCTTGATA

gL5N2, PL5N2, tL5N1, CL5N2, RL5N2, iL1N1:

GAATTAGACCAACCTAAAAACGAAATGCCACT**CTTGGGTCGTAGACA**

tL5N2: TAGCAAAGTACAGACCAGGCGGAGGACAG**CTTGGGTCGTAGACA**

tL5N3: GTAATTGAACCAGTCAGGACGTTGAGAACTGG**CTTGGGTCGTAGACA**

tL5N4, iL1N2: ACAATTTTAAAGAAGTTTTGCCAGGCGAGAGG**CTTGGGTCGTAGACA**

tL5N5, NL5N1, iL1N3: TATCATTCATATCGCGTTTTAATTGCCGAAA**CTTGGGTCGTAGACA**

gL5N3, PL5N3, dL5N1, tL5N6, oL5N1, RL5N3, hL5N1, NL5N2:

**TCGACGACTACTGAC**AAACATGTATCTGCGAACGAGTAGAACAGTTGACT**CTTGGGTCGTAGACA**

iL1N4: AACATGTATCTGCGAACGAGTAGAACAGTTGACT**CTTGGGTCGTAGACA**

tL5N7, iL1N5: AACTTTTTTATGACCCTGTAATAGGTTGTAC**CTTGGGTCGTAGACA**

RL5N4, NL5N3: **TCGACGACTACTGAC**AACTTTTTTATGACCCTGTAATA GGTTGTAC**CTTGGGTCGTAGACA**

tL5N8, iL1N6: GTGAATAAAAAGGCTATCAGGTCATTTTTGAG**CTTGGGTCGTAGACA**

tL5N9, iL1N7: TATACAGTGCCATCAAAAATAATTTTTAACC**CTTGGGTCGTAGACA**

tL5N10, iL1N8: TTTGAGTACCGCACCGCTTCTGGCACTCCAG**CTTGGGTCGTAGACA**

gL5N4, dL5N2, tL5N11, CL5N3, oL5N2:

**TCGACGACTACTGAC**CTGAACCTAGAGGATCCCCGGGTACCTGCAGGCTTGGGTCGTAGACA

iL1N9: TCGACTCTCAAATATCCCCGGGTACCTGCAGG**CTTGGGTCGTAGACA**

gL6N1, PL6N1, CL6N1, RL6N1: CCGATAGTCTCCCTCAGAGCCGCCACCACC**CTTGGGTCGTAGACA**

gL6N2, PL6N2, tL6N1, CL6N2, RL6N2, iL2N1:

**TCGACGACTACTGAC**CGAAGGCAGCCAGCAAAATCACCA CCATTTGG

tL6N2: **TCGACGACTACTGAC**ATGAACGGGTAGAAAATACATACA CAGTATGT

tL6N3: **TCGACGACTACTGAC**CTCATTATGCGCTAATATCAGAGA GTCAGAGG

tL6N4, iL2N2: **TCGACGACTACTGAC**CTTTTGAATCCTGAATCTTACCA ACCCAGCT

tL6N5, NL6N1, iL2N3: **TCGACGACTACTGAC**GACTTCAACAAGAACGGGTATTAATCTTTTCT

gL6N3, PL6N3, dL6N1, tL6N6, oL6N1, RL6N3, hL6N1, NL6N2:

**TCGACGACTACTGAC**TTCCCAATATTTAGGCAGAGGCATACAACGCC**CTTGGGTCGTAGACA**

iL2N4: **TCGACGACTACTGAC**TTCCCAATATTTAGGCAGAGGCATACAACGCC

tL6N7, iL2N5: **TCGACGACTACTGAC**CAAAAACACAAATATATTTTAGTT CGCGAGAA

RL6N4: **TCGACGACTACTGAC**CAAAAACACAAATATATTTTAGTTTCGCGAGAA**CTTGGGTCGTAGACA**

NL6N3: CAAAACACAAATATATTTTAGTTTCGCGAGAA**CTTGGGTCGTAGACA**

tL6N8, iL2N6: **TCGACGACTACTGAC**AGATCTACCCTTGCTTCTGTAAATATATGTGA

tL6N9, iL2N7: **TCGACGACTACTGAC**ATAGGAACAACAGTACCTTTTACACAGATGAA  
tL6N10, iL2N8: **TCGACGACTACTGAC**CCAGCTTTACATTATCATTTTGC GTTTAAAAG  
gL6N4, dL6N2, tL6N11, CL6N3, oL6N2:  
**TCGACGACTACTGACT**CGACTCTCAAATATCAAACCCTCTCACCTTG**CTTGGGTCGTAGACA**  
iL2N9: **TCGACGACTACTGACT**CGACTCTCAAATATCAAACCCTC TCACCTTG  
gL7N1, PL7N1, CL7N1, RL7N1:  
**TCGACGACTACTGAC**ATTACCAT ATCACCGGAACCAGAGACCCTCAGAACCGCCACGTTCCAG  
gL7N2, PL7N2, CL7N2, RL7N2:  
TTATTACGTAAAGGTGGCAACATACCGTCACCGACTTGAGGTAGCACC**CTTGGGTCGTAGACA**  
AL7N1: **TCGACGACTACTGAC**ACAAGAATAAGACTCCTTATTACGTAAAGGTGGCAACATACCGTCACC  
AL7N2: **TCGACGACTACTGAC**GAGCGTCTGAACACCCTGAACAAAAGATAACCC**CTTGGGTCGTAGACA**  
AL7N3: CCGCACTCTTAGTTGCTATTTTGCACGCTAAC**CTTGGGTCGTAGACA**  
AL7N4: **TCGACGACTACTGAC**CCAGTAATA AATCAATAATCGGCTGACCAAGTA  
gL7N3, PL7N3, dL7N1, tL7N1, oL7N1, RL7N3, hL7N1  
**TCGACGACTACTGAC**CAGTAATAAATCAATAATCGGCTGACCAAGTACCGCACTCTTAGTTGC  
RL7N4: CTTCTGACAGAATCGCCATATTTATTTTCGAGC**CTTGGGTCGTAGACA**  
AL7N5, gL7N4, PL7N4, dL7N2, tL7N2, oL7N2, hL7N2:  
ACAAAGAAAATTTTCATCTTCTGACAGAATCGCCATATTTATTTTCGAGC**CTTGGGTCGTAGACA**  
NL7N1: **TCGACGACTACTGACT**TAAATTAATCGCAAGACAAAGAAAATTTTCATCTTCTGACAGAATCGC  
RL7N6, NL7N2: **TCGACGACTACTGAC**ACAATAACAGTACATAAATCAATCGTCGCTA**CTTGGGTCGTAGACA**  
RL7N7, NL7N3: TTATTAATGAACAAAAGAAACCACCTTTTCAGGTTTAAACGTTCCGGGAGAC**CTTGGGTCGTAGACA**  
gL7N5, dL7N3, tL7N3, CL7N3, oL7N3:  
**TCGACGACTACTGACT**CTGGTCACCCGAACGTTATTAATGAACAAAAGAAACCACCTTTTCAGG  
gL7N6, dL7N4, tL7N4, CL7N4, oL7N4:  
GCCAACAGATACGTGGCACAGACATGAAAAATCTAAAGCAAATCAATA**CTTGGGTCGTAGACA**  
gL8N1, PL8N1, CL8N1, RL8N1:  
TGCCTTGACAGTCTCTGAATTTACCCCTCAGAGCCACCACTTTTTCA**CTTGGGTCGTAGACA**  
AL8N1: GCCACCACTCTTTTCATAATCAAATAGCAAGGCCGAAACTAAAGGTG**CTTGGGTCGTAGACA**  
gL8N2, PL8N2, CL8N2, RL8N2:  
**TCGACGACTACTGACT**AATCAAATAGCAAGGCCGAAACTAAAGGTGAATTATCATAAAAAGAA  
AL8N2: **TCGACGACTACTGAC**AATTATCATAAAAAGAAACGCAAAGAAGAACTG**CTTGGGTCGTAGACA**  
AL8N3: **TCGACGACTACTGAC**GCATGATTTGAGTTAAGCCCAATAGACGGGAGAATTAACCTTCCAGAG  
AL8N4: CCTAATTTAAGCCTTAAATCAAGAATCGAGAACAAGCAAGCGAGCATG**CTTGGGTCGTAGACA**  
AL8N5: **TCGACGACTACTGACT**TAGAAACCAGAGAATATAAAGTACCAGTAGGG**CTTGGGTCGTAGACA**  
gL8N3, PL8N3, dL8N1, tL8N1, oL8N1, RL8N3, hL8N1:  
CAAGCAAGCGAGCATGTAGAAACCAGAGAATATAAAGTACCAGTAGGG**CTTGGGTCGTAGACA**

AL8N6, gL8N4, PL8N4, dL8N2, tL8N2, oL8N2, RL8N4, hL8N2:

**TCGACGACTACTGAC**CTTAATTGCTAAATTTAATGGTTTTGCTGATGCAAATCCATTTTCCCT

RL8N5, NL8N1: TAGAATCCCCTTTTTAATGGAAACGGATTTCGCCTGATTGAAAGAAAT**CTTGGGTCGTAGACA**

RL8N6, NL8N2: **TCGACGACTACTGAC**TGCGTAGAAGAAGGAGCGGAATTACGTATTA**CTTGGGTCGTAGACA**

gL8N5, dL8N3, tL8N3, CL8N3, oL8N3:

CGGAATTACGTATTAATCCTTTGGTTGGCAAATCAACAG GAGAGCCA**CTTGGGTCGTAGACA**

RL8N7, NL8N3: **TCGACGACTACTGAC**ATCCTTTGGTTGGCAAATCAACAGGAGAGCCAGCAGCAAATATTTTT

gL8N6, dL8N4, tL8N4, CL8N4, oL8N4:

**TCGACGACTACTGAC**GCAGCAAATATTTTTGAATGGCTACCAGTAATAAAAGGGCAAACCTAT

AL9N1, gL9N1, PL9N1, dL9N1, CL9N1, RL9N1, NL9N1:

**TCGACGACTACTGAC**TGAAACCATTATTAGCGTTTGCCACCTCAGAGCCGCCACCGCCAGAAT

AL9N2, gL9N2, PL9N2, dL9N2, RL9N1, NL9N2:

**TCGACGACTACTGAC**GAATAAGTGACGGAAATTATTCATGTCACCAA**CTTGGGTCGTAGACA**

CL9N2: ATACCCAAACACCACGGAATAAGTGACGGAAATTATTCATGTCACCAA**CTTGGGTCGTAGACA**

AL9N3, gL9N3, PL9N3, dL9N3, RL9N3, NL9N3:

**TCGACGACTACTGAC**AAGAAACAATAACGGAATACCCAAACACCACG**CTTGGGTCGTAGACA**

AL9N4, gL9N4, PL9N4, dL9N4, RL9N4, NL9N4:

**TCGACGACTACTGAC**CAAAATAAACAGGGAAGCGCATTATAAGAGC**CTTGGGTCGTAGACA**

AL9N5, gL9N5, PL9N5, dL9N5, RL9N5, NL9N5:

**TCGACGACTACTGAC**ATTTTCATCTTGCGGGAGGTTTTGGCCAGTT**CTTGGGTCGTAGACA**

AL9N6, gL9N6, PL9N6, dL9N6, RL9N6, NL9N6:

**TCGACGACTACTGAC**GGTAAAGTATCCCATCCTAATTTACCGTTTT**CTTGGGTCGTAGACA**

tL9N1: **TCGACGACTACTGAC**GGTAAAGTATCCCATCCTAATTTACCGTTTTATTTTCATCTTGCGGG

AL9N7, gL9N7, dL9N7, NL9N7:

**TCGACGACTACTGAC**GACCGTGTAAAGCCAACGCTCAACGACAAAA**CTTGGGTCGTAGACA**

PL9N7, tL9N2: TATGTAAA GAAATACCGACCGTGTAAAGCCAACGCTCAACGACAAAA**CTTGGGTCGTAGACA**

oL9N1, hL9N1: **TCGACGACTACTGAC**GACCGTGTAAAGCCAACGCTCAACGACAAAAAGGTAAAGTATCCCATC

AL9N8, gL9N8, dL9N8, oL9N2, hL9N2, NL9N8:

**TCGACGACTACTGAC**ATAGCGATTATACTATATGTAAAGAAATACC**CTTGGGTCGTAGACA**

AL9N9, gL9N9, dL9N9, oL9N3, hL9N3, NL9N9:

**TCGACGACTACTGAC**ACCAAGTTAATTTTCATTTGAATTATTGAAAAC**CTTGGGTCGTAGACA**

AL9N10, gL9N10, dL9N10, oL9N4, hL9N4, NL9N10:

**TCGACGACTACTGAC**TTCTGATCACGTAAAACCAAGTTAATTTTCAT**CTTGGGTCGTAGACA**

tL9N3, CL9N3, RL9N8:

**TCGACGACTACTGAC**AATTGAGGAAACAATTCGACAACCTTCATCATATTCCTGATCACGTAAA

AL9N11, L9N11, dL9N11, oL9N5, hL9N5, NL9N11:

TCGACGACTACTGACAATTGAGGAAACAATTCGACAACCTTCATCATACTTGGGTCGTAGACA

AL9N12, gL9N12, dL9N12, tL9N4, CL9N4, oL9N6, RL9N9, hL9N6, NL9N12:

GTCACACGATTAGTCTTTAATGCGGCAACAGTGCCACGCTTTGAAAGGCTTGGGTCGTAGACA

Other sequences can be found in the sequences list for the tall rectangle origami<sup>2</sup>.

**For single and double lines pcDNA of tall rectangular DNA origami:**

L1N1: TCGACGACTACTGACTGAGGACTAGGGAGTTAAAGGCCGCTCCAAAAGGAGCCTTAGCGGAGT

L1N2: TCGACGACTACTGACCCGGAACGTACCAAGCGGAAACAAGAGGCTTCTTGGGTCGTAGACA

L1N3: TCGACGACTACTGACGCTTGAGATTCATTACCCAAATCATTACTTAGCTTGGGTCGTAGACA

L1N4: TCGACGACTACTGACGTAAGAGCACAGGTAGAAAAGATTCTAAATTGGCTTGGGTCGTAGACA

L1N5: TCGACGACTACTGACACCCTGACAATCGTCATAAATATTGAGGCATACTTGGGTCGTAGACA

L1N6: TCGACGACTACTGACCAACATGTTTAGAGAGTACCTTTAAGGTCTTTCTTGGGTCGTAGACA

L1N7: TCGACGACTACTGACCAAGGCAAAGCTATATTTTCATTTCTGTAGCTTGGGTCGTAGACA

L1N8: TCGACGACTACTGACATCAATATAACCCTCATATATTTTCATACAGGCTTGGGTCGTAGACA

L1N9: TCGACGACTACTGACTAAACGTTAAACTAGCATGTCAAAAATCACCTTGGGTCGTAGACA

L1N10: TCGACGACTACTGACAACCGTGCGAGTAACAACCCGTCGTTAAATTGCTTGGGTCGTAGACA

L1N11: TCGACGACTACTGACCCAGGGTTTTGGGAAGGGCGATCGCGCATCGTCTTGGGTCGTAGACA

L1N12: AGCTGATTACTCACATTAATTGCGTGTATCCGCTCACAAGGGTAACGCTTGGGTCGTAGACA

L9N1: TCGACGACTACTGACTGAAACCATTATTAGCGTTTTGCCACCTCAGAGCCGCCACCGCAGAAT

L9N2: TCGACGACTACTGACGAATAAGTGACGGAAATTATTCATGTCACCAACTTGGGTCGTAGACA

L9N3: TCGACGACTACTGACAAGAAACAATAACGGAATACCCAAACACCACGCTTGGGTCGTAGACA

L9N4: TCGACGACTACTGACCAAAATAAACAGGGAAGCGCATTAAATAAGAGCCTTGGGTCGTAGACA

L9N5: TCGACGACTACTGACATTTTCATCTTGCGGGAGGTTTTGGCCAGTTACTTGGGTCGTAGACA

L9N6: TCGACGACTACTGACGGTAAAGTATCCCATCCTAATTTACCGTTTTCTTGGGTCGTAGACA

L9N7: TCGACGACTACTGACGACCGTGTTAAAGCCAACGCTCAACGACAAAACTTGGGTCGTAGACA

L9N8: TCGACGACTACTGACATAGCGATTATAACTATATGTAAGAAATACCCTTGGGTCGTAGACA

L9N9: TCGACGACTACTGACACCAAGTTAATTTTCATTTGAATTATTGAAAACCTTGGGTCGTAGACA

L9N10: TCGACGACTACTGACTTCCTGATCACGTAAAACCAAGTTAATTTTCATCTTGGGTCGTAGACA

L9N11: TCGACGACTACTGACAATTGAGGAAACAATTCGACAACCTTCATCATACTTGGGTCGTAGACA

L9N12: GTCACACGATTAGTCTTTAATGCGGCAACAGTGCCACGCTTTGAAAGGCTTGGGTCGTAGACA

L10N1: AATGCCCCATAAATCCTCATTAATAAAGAACCACCACCAGAGTTCGGTCACTTGGGTCGTAGACA

L10N2: TCGACGACTACTGACTAGCCCCCTCGATAGCAGCACCGTAGGGAAGGCTTGGGTCGTAGACA

L10N3: TCGACGACTACTGACTAAATATTTTATTTGTACAATCCCGAGGAACTTGGGTCGTAGACA

L10N4: TCGACGACTACTGACACGCAATAATGAAATAGCAATAGCAGAGAATACTTGGGTCGTAGACA

L10N5: TCGACGACTACTGACACATAAAAAACAGCCATATTATTTATTAGCGAACTTGGGTCGTAGACA

L10N6: TCGACGACTACTGACCCTCCCGACGTAGGAATCATTACCGAACAAGACTTGGGTCGTAGACA



L10N7: TCGACGACTACTGACAAAATAATAATTCTGTCCAGACGACAAAATTCTTTGGGTCGTAGACA  
L10N8: TCGACGACTACTGACTACCAGTAGATAAATAAGGCGTTAGGCTTAGGCTTTGGGTCGTAGACA  
L10N9: TCGACGACTACTGACTTGGGTAAAGCTTAGATTAAGACGATTAATTACTTTGGGTCGTAGACA  
L10N10: TCGACGACTACTGACCATTAAACACAAAATCGCGCAGAGATATCAAACTTTGGGTCGTAGACA  
L10N11: TCGACGACTACTGACATTATTTGTATCAGATGATGGCAAAAAGTATTACTTTGGGTCGTAGACA  
L10N12: TCGACGACTACTGACGACTTTACAAGGTTATCTAAAATAAGTATTAACTTTGGGTCGTAGACA  
L10N13: TCGACGACTACTGACCACCGCCTCGAACTGATAGCCCTATTATTACATTGGCAGCAATATTA

Other sequences can be found in the sequences list for the tall rectangle origami<sup>2</sup>.

### Supplementary references

1. S. Pal, et al. DNA Directed Self-Assembly of Anisotropic Plasmonic Nanostructures. *J. Am. Chem. Soc.* **133**, 17606-17609 (2011).
2. P. W. K. Rothmund. Folding DNA to create nanoscale shapes and patterns. *Nature* **440**, 297-302 (2006).
